# Supplementary material
Source: PubMed Central journal article supplement (PMC3087817)

## Supporting Information

### [3,3]-Sigmatropic Rearrangement/5-Exo-Dig Cyclization Reactions of Benzyl Alkynyl Ethers: Synthesis of Substituted 2-Indanones and Indenes

Armen Tudjarian and Thomas Minehan \*

*Department of Chemistry and Biochemistry, California State University–  
Northridge,  
Northridge, CA 91330*

|                                                                                                                              |             |
|------------------------------------------------------------------------------------------------------------------------------|-------------|
| Experimental Procedures                                                                                                      | pp. S1-S3   |
| Spectroscopic data for compounds:<br><b>3a-j, 13a-j, 14a-e, 15a-d, 18b, and 19b</b>                                          | pp. S4-S18  |
| <sup>1</sup> HNMR and <sup>13</sup> CNMR spectra for compounds:<br><b>3a-j, 13a-j, 14a-e, 15a-d, 18b, and 19b; NOESY 15d</b> | pp. S19-S80 |
| <sup>1</sup> HNMR kinetic studies at 330K                                                                                    | pp. S81-S93 |

**General Methods.** Distilled water was used in all of the experiments. Organic extracts were dried over Na<sub>2</sub>SO<sub>4</sub>, filtered, and concentrated using a rotary evaporator at aspirator pressure (20-30mmHg). Chromatography refers to flash chromatography and was carried out on SiO<sub>2</sub> (silica gel 60, 230-400 mesh). <sup>1</sup>H and <sup>13</sup>C NMR spectra were measured in CDCl<sub>3</sub> at 400 MHz and 100 MHz, respectively, using Me<sub>4</sub>Si as internal standard. Chemical shifts are reported in ppm downfield (δ) from Me<sub>4</sub>Si.

*Representative procedure for the synthesis of 3a, 3b, 3e, 14a-e*

A mixture of diazoacetophenone (136 mg, 1mmol) and benzyl alcohol (162 mg, 1.5 mmol) were dissolved in dry toluene (4 mL) under argon and stirred at room temperature for 2 minutes. Indium (III) trifluoromethanesulfonate (56.2 mg, 0.1 mmol, 10 mol%) was added and a rapid evolution of nitrogen gas was observed. The reaction was monitored by TLC, and when complete consumption of the starting material was observed, saturated NaHCO<sub>3</sub> (10 mL) was added and the reaction mixture was diluted with ether (20 mL). The phases were separated and the aqueous phase was back-extracted with ether (1 x 20mL). The combined organic extracts were then dried over Na<sub>2</sub>SO<sub>4</sub>, filtered, and concentrated *in vacuo*. Purification of the residue by flash chromatography (SiO<sub>2</sub>) afforded α-alkoxyketones **3**.

*Representative procedure for the synthesis of 3c, 3d, 3f-j.*

To a cooled (0 °C) suspension of NaH (60% in mineral oil, 1.0 g, 69 mmol) in 47 ml THF was added a solution of bromoacetic acid (1.36 g, 9.8 mmol) in 6.75 ml THF. The suspension was warmed to room temperature and stirred until the evolution of hydrogen stopped. Benzyl alcohol (1.04 ml, 10.0 mmol) was then added dropwise at 0 °C and the resulting grey/milky suspension was stirred at room temperature until the evolution of hydrogen stopped again. After addition of tetrabutylammonium iodide (217 mg, 0.59 mmol) the resulting white/milky reaction mixture was heated at reflux temperature for 3 1/2 h and then cooled to 0 °C. EtOH (3 ml) was added and the mixture was concentrated to give a light-yellow oil, which was diluted with 20 ml sat. aq. NaHCO<sub>3</sub> and 20 ml Et<sub>2</sub>O. The phases were separated and the organic layer was extracted with sat. aq. NaHCO<sub>3</sub> (2 x 20 ml). The combined aqueous extracts were then acidified to pH 2 with conc. HCl and extracted with Et<sub>2</sub>O (3 x 20 ml). The combined organic extracts were once washed with 20 ml sat. aq. NaCl, dried over MgSO<sub>4</sub> and concentrated under reduced pressure, which gave the crude benzyloxyacetic acid as a yellow oil (12.8 g, directly used for the next step without further purification).

To a solution of benzyloxy acetic acid (1 g, 6 mmol) in 11 mL dichloromethane at 0°C was added 1,1'-carbonyl diimidazole (1.26 g, 7.82 mmol) at 0°C. The solution bubbled and upon completion it was warmed to room temperature for 30 minutes. The solution was cooled to 0°C and triethylamine (1.1 mL, 8.4 mmol) was added, followed by the Weinreb amine hydrochloride salt (0.82 g, 8.4 mmol). The solution was allowed to warm to room temperature and was stirred overnight. The mixture was diluted with 1M HCl (10 mL) and EtOAc (20 mL). The phases were separated and the aqueous phase was back-

extracted with EtOAc (1 x 20 mL). The combined organic extracts were then dried over Na<sub>2</sub>SO<sub>4</sub>, filtered, and concentrated *in vacuo*. Crude amide **10** was taken directly to the next step without further purification.

To a solution of Weinreb amide **10** (5 mmol) in THF (5 mL) at -78°C under argon was added a solution of aryllithium reagent (generated from the corresponding aryl bromide 1M in THF by the addition of 0.95 equiv. *n*-BuLi) dropwise. Upon completion of the addition, TLC indicated complete conversion to the aryl ketone. The mixture was allowed to warm to -20°C and was quenched with saturated NH<sub>4</sub>Cl solution (10 mL). The mixture was diluted with ether (3m L) and was allowed to stir at room temperature for one hour. The phases were separated and the aqueous phase was back-extracted with EtOAc (1 x 20 mL). The combined organic extracts were then dried over Na<sub>2</sub>SO<sub>4</sub>, filtered, and concentrated *in vacuo*. Purification of the residue by flash chromatography (SiO<sub>2</sub>) afforded  $\alpha$ -alkoxyketones **3**.

*Representative procedure for enol triflate (11a-i) formation*

Hexamethyldisilazane (0.29 mL, 2.5 mmol) dissolved in dry THF (1mL) under argon was cooled to 0°C in an ice bath and *n*-BuLi (0.75 mL), 2M in cyclohexane, 1.5 mmol) was added dropwise. After 10 minutes, the mixture was cooled to -78°C and a solution of  $\alpha$ -alkoxyketone (1 mmol) in THF (1 mL) was added dropwise. The reaction mixture was stirred for one hour at -78°C and then a solution of *N*-phenyl triflimide (1.5 mmol) in 1:1 THF:DMPU (1mL) was added rapidly (1s). The mixture was allowed to warm to room temperature and then was stirred for one hour, at which time TLC indicated >90% consumption of starting material. The phases were separated and the aqueous phase was back-extracted with ether (1 x 20 mL). The combined organic extracts were then dried over Na<sub>2</sub>SO<sub>4</sub>, filtered, and concentrated *in vacuo*. Purification of the crude enol triflate was accomplished by rapid chromatography over silica gel employing 1% Et<sub>3</sub>N in the eluant (95:5 hexanes:ether).

*Representative procedure for alkynyl ether (12a-i) formation and sigmatropic rearrangement/cyclization to indanones 13a-i and 15a-d.*

Enol triflate obtained from the above procedure (~1 mmol) was dissolved in THF (1 mL) under argon and cooled to -78°C. A solution of potassium *tert*-butoxide (1M in THF, 3.0 mL, 3.0 mmol) was added dropwise, and the reaction mixture darkened in color. After 20 minutes, a solution of saturated NaHCO<sub>3</sub> (10 mL) was added and the mixture was allowed to warm to room temperature with stirring. Ether (10 mL) was added, and the phases were separated. The aqueous later was back-extracted with ether (1 x 20 mL), and the combined organic extracts were then dried over Na<sub>2</sub>SO<sub>4</sub>, filtered, and concentrated *in vacuo*. The crude alkynyl ether was then dissolved in toluene (2 mL) and heated on an oil bath under argon for one hour, at which time TLC indicated complete conversion to the indanone product. Concentration *in vacuo* and purification of the residue by flash chromatography (SiO<sub>2</sub>) afforded indanones **13a-i** and **15a-d**.

*Procedure for the synthesis of indene 18b.*

To a solution of diethyl(cyanomethyl)phosphonate (531 mg, 3.0 mmol) in THF (1 mL) was added NaH (100 mg, 2.5 mmol) at 0°C and the solution was allowed to stir for 30 minutes. Then a solution of 2-indanone **13b** (100 mg, 0.45 mmol) in THF (1 mL) was added and the mixture was allowed to stir 4 hours at room temperature. The mixture was diluted with saturated NaHCO<sub>3</sub> (10 mL). Ether (20 mL) was added, and the phases were separated. The aqueous layer was back-extracted with ether (1 x 20 mL), and the combined organic extracts were then dried over Na<sub>2</sub>SO<sub>4</sub>, filtered, and concentrated *in vacuo*. Purification of the residue by flash chromatography (SiO<sub>2</sub>) afforded indene **18b**.

*Procedure for the synthesis of indene 19b*

To a solution of nitrile **18b** (35.0 mg, 0.142 mmol) in methanol (1.2 mL) at 0°C were added Boc<sub>2</sub>O (69.0 mg, 0.32 mmol) and NiCl<sub>2</sub>•6H<sub>2</sub>O (3.8 mg, 0.016 mmol). Then NaBH<sub>4</sub> (42.4 mg, 1.12 mmol) was added in small portions over 30 minutes. After warming to room temperature and stirring for 2 hours, the mixture was diluted with saturated NaHCO<sub>3</sub> (10 mL) and concentrated *in vacuo* to remove methanol. Ethyl acetate (10 mL) was added and the phases were separated. The aqueous layer was back-extracted with ethyl acetate (1 x 10mL), and the combined organic extracts were then dried over Na<sub>2</sub>SO<sub>4</sub>, filtered, and concentrated *in vacuo*. Purification of the residue by flash chromatography (SiO<sub>2</sub>) afforded indene **19b**.

Ref. 15: For the transformation leading to **15d**, we believe that steric interactions between the *tert*-butyl group and the phenyl-substituted ketene in the corresponding *syn* form (**16<sup>s</sup>**, see below) hinder alignment of the ketene carbonyl carbon with the benzylic carbon atom (which is necessary for 5-*exo*-dig cyclization to occur) by favoring rotamers in which the ketene is directed away from the benzylic carbon atom. Thus, despite the allylic strain present in **16<sup>a</sup>**, it is likely that the reaction proceeds preferentially through **16<sup>a</sup>** to **15d**.

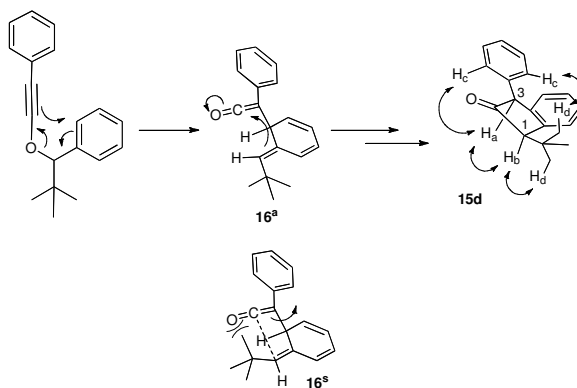

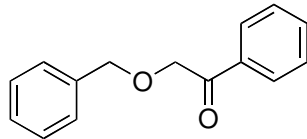

**3a**

Purification: SiO<sub>2</sub>(10% EtOAc in hexanes) afforded **3a** (87%).

*See spectra on pages S19 and S20 (see also reference 3, main text)*

<sup>1</sup>H NMR: (400 MHz, CDCl<sub>3</sub>)

7.93 (d, *J*=7.6 Hz, 2H); 7.57 (t, *J*=7.6 Hz, 1H); 7.46 (t, *J*=8.0 Hz, 2H);

7.40- 7.27 (m, 5H); 4.82 (s, 2H); 4.70 (s, 2H).

<sup>13</sup>C NMR: (100 MHz, CDCl<sub>3</sub>)

197.2; 136.97; 134.6; 133.9; 129.4; 128.8; 128.6; 128.2; 127.9; 127.1;

123.6; 73.4; 72.4

HRMS (ESI): calculated for C<sub>15</sub>H<sub>14</sub>NaO<sub>2</sub> 249.0892 found 249.0854 (M+Na)<sup>+</sup>

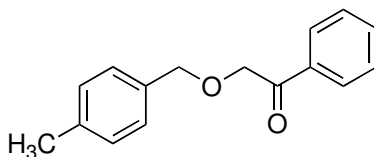

**3b**

Purification: SiO<sub>2</sub>(10% EtOAc in hexanes) afforded **3b** (82%).

*See spectra on pages S21 and S22*

<sup>1</sup>H NMR: (400 MHz, CDCl<sub>3</sub>)

7.90 (d, *J*=7.6 Hz, 2H); 7.51 (t, *J*=7.6 Hz, 1H); 7.46-7.27 (m, 6H); 4.72 (s,

2H); 4.65 (s, 2H); 2.34 (s, 3H)

<sup>13</sup>C NMR: (100 MHz, CDCl<sub>3</sub>)

196.3; 137.6; 135.0; 134.4; 133.5; 129.2; 128.7; 128.2; 128.0; 73.2; 72.5;

21.2

HRMS (ESI): calculated for C<sub>16</sub>H<sub>16</sub>NaO<sub>2</sub> 263.1048 found 263.1107 (M+Na)<sup>+</sup>

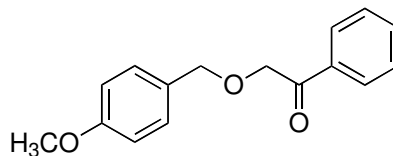

**3c**

Purification: SiO<sub>2</sub>(10% EtOAc in hexanes) afforded **3c** (71%).

*See spectra on pages S23 and S24*

<sup>1</sup>H NMR: (400 MHz, CDCl<sub>3</sub>)

7.83 (dd, *J*=8.4, 1.2 Hz, 2H); 7.45-7.25 (m, 5H); 6.83 (d, *J*=8.8 Hz, 2H);  
4.62 (s, 2H); 4.54 (s, 2H); 3.67 (s, 3H)

<sup>13</sup>C NMR: (100 MHz, CDCl<sub>3</sub>)

196.3, 159.4; 134.9; 133.4; 129.7; 129.4; 128.6; 128.3; 127.8; 113.8; 72.9;  
72.2; 55.1.

HRMS (ESI): calculated for C<sub>16</sub>H<sub>16</sub>NaO<sub>3</sub> 279.0997, found 279.1098 (M+Na)<sup>+</sup>

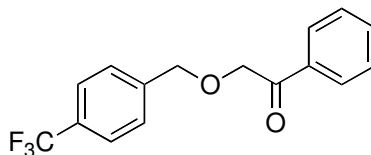

**3d**

Purification: SiO<sub>2</sub>(5% EtOAc in hexanes) afforded **3d** (68%).

*See spectra on pages S25 and S26*

<sup>1</sup>H NMR: (400 MHz, CDCl<sub>3</sub>)

7.91 (dd, *J*=9.6 Hz, 2H); 7.61-7.42 (m, 7H); 4.81 (s, 2H); 4.72 (s, 2H).

<sup>13</sup>C NMR: (100 MHz, CDCl<sub>3</sub>)

196.0; 141.6; 134.7; 133.7; 129.5; 128.8; 127.9; 127.8; 125.4; 125.3;  
115.4; 72.8; 72.5

HRMS (ESI): calculated for C<sub>16</sub>H<sub>13</sub>F<sub>3</sub>NaO<sub>2</sub> 317.0765, found 317.0852 (M+Na)<sup>+</sup>

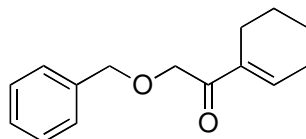

**3e**

Purification: SiO<sub>2</sub> (5% EtOAc in hexanes) afforded **3e** (61%).

*See spectra on pages S27 and S28*

<sup>1</sup>H NMR: (400 MHz, CDCl<sub>3</sub>)

7.34-7.25 (m, 5H); 6.80 (t, *J*=4.0 Hz, 1H); 4.57 (s, 2H); 4.04 (s, 2H); 2.18 (m, 4H); 1.57 (m, 4H).

<sup>13</sup>C NMR: (100 MHz, CDCl<sub>3</sub>)

196.8; 140.7; 138.2; 128.5; 128.2; 128.1; 74.1; 72.3; 25.4; 22.1; 21.0; 20.8.

HRMS (ESI): calculated for C<sub>15</sub>H<sub>18</sub>NaO<sub>2</sub> 253.1205 found 253.1275 (M+Na)<sup>+</sup>

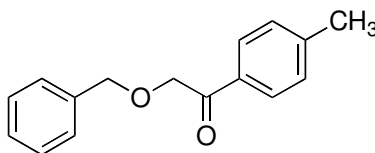

**3f**

Purification: SiO<sub>2</sub> (10% EtOAc in hexanes) afforded **3f** (69%).

*See spectra on pages S29 and S30*

<sup>1</sup>H NMR: (400 MHz, CDCl<sub>3</sub>)

7.83-7.80 (d, *J*=8.4 Hz, 2H); 7.41-7.23 (m, 7H); 4.73 (s, 2H); 4.68 (s, 2H); 2.39 (s, 3H).

<sup>13</sup>C NMR: (100 MHz, CDCl<sub>3</sub>)

195.9; 144.4; 137.4; 132.4; 129.3; 128.5; 128.1; 128.0; 73.3; 72.5; 21.7

HRMS (ESI): calculated for C<sub>16</sub>H<sub>16</sub>NaO<sub>2</sub> 263.1048, found 263.1055 (M+Na)<sup>+</sup>

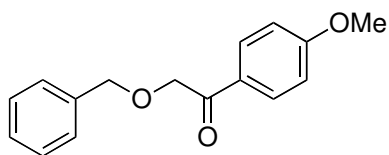

**3g**

Purification: SiO<sub>2</sub>(10% EtOAc in hexanes) afforded **3g** (82%).

*See spectra on pages S31 and S32*

<sup>1</sup>H NMR: (400 MHz, CDCl<sub>3</sub>)

7.89 (d, *J*=8.8 Hz, 2H); 7.40-7.32 (m, 5H); 6.88 (d, *J*=8.8 Hz, 2H); 4.69 (s, 2H); 4.66 (s, 2H); 3.81 (s, 3H)

<sup>13</sup>C NMR: (100 MHz, CDCl<sub>3</sub>)

194.9; 163.8; 150.6; 137.5; 130.3; 128.5; 128.0; 127.9; 116.2; 114.7; 113.9; 73.3; 72.5; 55.4.

HRMS (ESI): calculated for C<sub>16</sub>H<sub>16</sub>NaO<sub>3</sub> 279.0997 found 279.0780 (M+Na)<sup>+</sup>

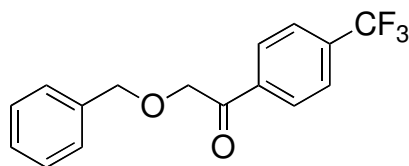

**3h**

Purification: SiO<sub>2</sub>(5% EtOAc in hexanes) afforded **3h** (73%).

*See spectra on pages S33 and S34*

<sup>1</sup>H NMR: (400 MHz, CDCl<sub>3</sub>)

8.05 (d, *J*=8.0 Hz, 2H); 7.74 (d, *J*=8.4 Hz, 2H); 7.39-7.33 (m, 5H); 4.76 (s, 2H); 4.70 (s, 2H)

<sup>13</sup>C NMR: (100 MHz, CDCl<sub>3</sub>)

195.6; 137.5; 136.9; 134.8; 128.6; 128.4; 128.2; 128.1; 125.7; 73.5; 72.8.

HRMS (ESI): calculated for C<sub>16</sub>H<sub>13</sub>F<sub>3</sub>NaO<sub>2</sub> 317.0765, found 317.0923 (M+Na)<sup>+</sup>



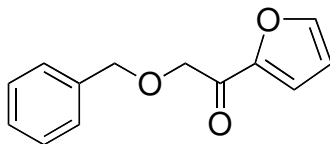

**3i**

Purification: SiO<sub>2</sub>(10% EtOAc in hexanes) afforded **3i** (85%).

*See spectra on pages S35 and S36*

<sup>1</sup>H NMR: (400 MHz, CDCl<sub>3</sub>)

7.53 (s, 1H); 7.52-7.24 (m, 6H); 6.47 (m, 1H); 4.63 (s, 2H); 4.54 (s, 2H)

<sup>13</sup>C NMR: (100 MHz, CDCl<sub>3</sub>)

185.5; 150.9; 146.7; 137.3; 128.5; 128.3; 128.0; 127.9; 118.2; 112.3; 73.4;  
72.2.

HRMS (ESI): calculated for C<sub>13</sub>H<sub>12</sub>NaO<sub>3</sub> 239.0684 found 239.0717 (M+Na)<sup>+</sup>

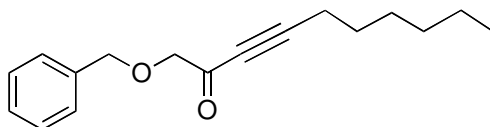

**3j**

Purification: SiO<sub>2</sub>(5% Et<sub>2</sub>O in hexanes) afforded **3j** (92%).

*See spectra on pages S37 and S38*

<sup>1</sup>H NMR: (400 MHz, CDCl<sub>3</sub>)

7.36-7.25 (m, 5H); 4.62 (s, 2H); 4.19 (s, 2H); 2.37 (t, *J*=6.8 Hz, 2H); 1.56  
(m, *J*=7.2 Hz, 2H); 1.38-1.26 (m, 5H); 0.89 (t, *J*=6.8 Hz, 3H).

<sup>13</sup>C NMR: (100 MHz, CDCl<sub>3</sub>)

185.0; 137.1; 128.4; 127.9; 97.5; 82.7; 75.8; 73.3; 31.2; 28.5; 27.5; 22.5;  
22.4; 19.0; 14.0

HRMS (ESI): calculated for C<sub>17</sub>H<sub>22</sub>NaO<sub>2</sub> 281.1517 found 281.1582 (M+Na)<sup>+</sup>

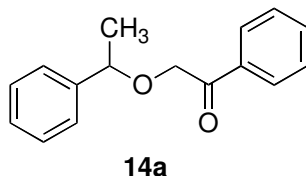

Purification: SiO<sub>2</sub>(5% EtOAc in hexanes) afforded **14a** (75%).

*See spectra on pages S39 and S40*

<sup>1</sup>H NMR: (400 MHz, CDCl<sub>3</sub>)

7.82 (d, *J*= 7.6 Hz, 2H); 7.46 (t, *J*= 7.6 Hz, 1H); 7.36-7.25 (m, 7H); 4.65 (d, *J*=16.8 Hz, 1H); 4.54 (q, *J*=6.4 Hz, 1H); 4.52 (d, *J*=16.8 Hz, 1H); 1.54 (d, *J*=6.4Hz, 3H)

<sup>13</sup>C NMR: (100 MHz, CDCl<sub>3</sub>)

195.9; 142.9; 135.0; 131.1; 128.6; 128.5; 128.2; 127.8; 127.7; 126.3; 78.3; 77.9; 71.2; 24.0; 23.9

HRMS (ESI): calculated for C<sub>16</sub>H<sub>16</sub>NaO<sub>2</sub> 263.1048 found 263.1632 (M+Na)+

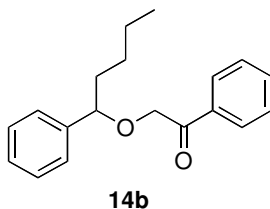

Purification: SiO<sub>2</sub>(3% Et<sub>2</sub>O in hexanes) afforded **14b** (78%).

*See spectra on pages S41 and S42*

<sup>1</sup>H NMR: (400 MHz, CDCl<sub>3</sub>)

7.84 (d, *J*= 8.4 Hz, 2H); 7.50 (t, *J*= 7.6 Hz, 1H); 7.40-7.25 (m, 7H); 4.63 (d, *J*=16.8 Hz, 1H); 4.49 (d, *J*=16.8 Hz, 1H); 4.40 (t, *J*=6.8 Hz, 1H); 1.97 (m, 1H); 1.72 (m, 1H); 1.43 (m, 1H); 1.30 (m, 1H); 0.86 (t, *J*=7.6 Hz, 3H)

<sup>13</sup>C NMR: (100 MHz, CDCl<sub>3</sub>)

196.4; 141.7; 135.1; 133.3; 128.6; 128.5; 128.3; 127.9; 127.0; 83.1; 71.3; 37.9; 28.0; 22.6; 14.0.

HRMS (ESI): calculated for C<sub>19</sub>H<sub>22</sub>NaO<sub>2</sub> 305.1517 found 305.1343 (M+Na)+

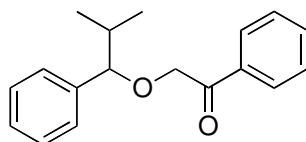

**14c**

Purification: SiO<sub>2</sub>(3% Et<sub>2</sub>O in hexanes) afforded **14c** (73%).

*See spectra on pages S43 and S44*

<sup>1</sup>H NMR: (400 MHz, CDCl<sub>3</sub>)

7.76 (d, *J*= 8.0 Hz, 2H); 7.43 (t, *J*= 7.8 Hz, 1H); 7.33-7.21 (m, 7H); 4.52 (d, *J*=16.0 Hz, 1H); 4.35 (d, *J*=16.0 Hz, 1H); 3.97 (d, *J*=8.0 Hz, 1H); 1.96 (m, *J*=8.0 Hz, 1H); 0.98 (d, *J*=8.0 Hz, 3H); 0.65 (d, *J*=8.0 Hz, 3H);

<sup>13</sup>C NMR: (100 MHz, CDCl<sub>3</sub>)

196.6; 140.3; 135.2; 133.3; 128.6; 128.5; 128.2; 128.0; 127.8; 127.7; 88.6; 71.6; 34.8; 19.2; 19.0.

HRMS (ESI): calculated for C<sub>18</sub>H<sub>20</sub>NaO<sub>2</sub> 291.1361 found 291.1440 (M+Na)+

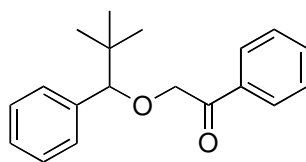

**14d**

Purification: SiO<sub>2</sub>(3% Et<sub>2</sub>O in hexanes) afforded **14d** (66%).

*See spectra on pages S45 and S46*

<sup>1</sup>H NMR: (400 MHz, CDCl<sub>3</sub>)

7.85 (d, *J*= 8.0 Hz, 2H); 7.49 (t, *J*= 7.8 Hz, 1H); 7.37 (t, *J*= 7.8 Hz, 2H); 7.32-7.25 (m, 5H); 4.62 (d, *J*=16.0 Hz, 1H); 4.41 (d, *J*=16.0 Hz, 1H); 4.15 (s, 1H); 0.96 (s, 9H)

<sup>13</sup>C NMR: (100 MHz, CDCl<sub>3</sub>)

196.5; 138.8; 135.3; 133.3; 128.6; 128.5; 128.0; 127.7; 127.6; 90.6; 71.9; 35.8; 26.4.

HRMS (ESI): calculated for C<sub>19</sub>H<sub>22</sub>NaO<sub>2</sub> 305.1517 found 305.1962 (M+Na)+

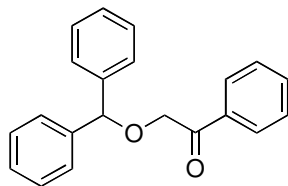

**14e**

Purification: SiO<sub>2</sub>(5% Et<sub>2</sub>O in hexanes) afforded **14e** (71%).

*See spectra on pages S47 and S48*

<sup>1</sup>H NMR: (400 MHz, CDCl<sub>3</sub>)

7.90 (d, *J*= 7.6 Hz, 2H); 7.55 (t, *J*= 7.4 Hz, 1H); 7.46-7.41 (m, 6H); 7.35 (t, *J*=7.6 Hz, 4H); 7.28 (t, *J*=7.8 Hz, 2H); 5.64 (s, 1H); 4.77 (s, 2H)

<sup>13</sup>C NMR: (100 MHz, CDCl<sub>3</sub>)

196.3; 141.3; 135.1; 133.5; 128.7; 128.5; 128.0; 127.8; 127.4; 83.8; 77.4; 77.1; 76.8; 71.4

HRMS (ESI): calculated for C<sub>21</sub>H<sub>18</sub>NaO<sub>2</sub> 325.1204 found 325.1541 (M+Na)<sup>+</sup>

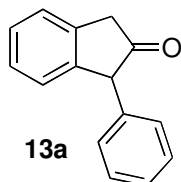

**13a**

Purification: SiO<sub>2</sub>(10% EtOAc in hexanes) afforded **11a** (98%).

*See spectra on pages S49 and S50 (see also reference 3, main text)*

<sup>1</sup>H NMR: (400 MHz, CDCl<sub>3</sub>)

7.43-7.22 (m, 7H); 7.17 (d, *J*=7.6 Hz, 2H); 4.71 (s, 1H); 3.68 (s, 2H).

<sup>13</sup>C NMR: (100 MHz, C<sub>6</sub>D<sub>6</sub>)

213.8; 141.4; 138.2; 137.3; 128.8; 128.5; 128.0; 127.9; 127.3; 126.0; 124.9; 59.8; 43.0

HRMS (ESI): calculated for C<sub>15</sub>H<sub>12</sub>NaO 231.0786, found 231.0777 (M+Na)<sup>+</sup>

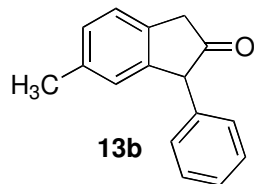

Purification: SiO<sub>2</sub>(10% EtOAc in hexanes) afforded **13b** (93%).

*See spectra on pages S51 and S52*

<sup>1</sup>H NMR: (400 MHz, CDCl<sub>3</sub>)

7.36-7.24 (m, 3H); 7.17-7.10 (m, 3H); 7.01 (s, 1H); 4.63 (s, 1H); 3.62 (s, 2H); 2.33 (m, 3H).

<sup>13</sup>C NMR: (100 MHz, C<sub>6</sub>D<sub>6</sub>)

216.8; 143.3; 140.0; 137.7; 128.8; 128.5; 128.0; 127.9; 126.7;  
124.3; 123.1; 60.2; 47.1; 23.5

HRMS (ESI): calculated for C<sub>16</sub>H<sub>14</sub>NaO 245.0942, found 245.1399 (M+Na)<sup>+</sup>

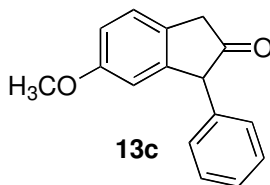

Purification: SiO<sub>2</sub>(10% EtOAc in hexanes) afforded **13c** (65%).

*See spectra on pages S53 and S54*

<sup>1</sup>H NMR: (400 MHz, CDCl<sub>3</sub>)

7.36-7.27 (m, 4H); 7.15 (d, *J*=7.6 Hz, 2H); 6.93 (m, 1H); 6.74 (m, 1H);  
4.66 (s, 1H); 3.78 (s, 3H); 3.62 (s, 2H).

<sup>13</sup>C NMR: (100 MHz, CDCl<sub>3</sub>)

214.2; 159.5; 142.4; 138.0; 129.1; 128.8; 128.4; 127.3; 125.7; 114.7;  
110.7; 60.2; 55.4; 42.3.

HRMS (ESI): calculated for C<sub>16</sub>H<sub>14</sub>NaO<sub>2</sub> 261.0891, found 261.0922 (M+Na)<sup>+</sup>

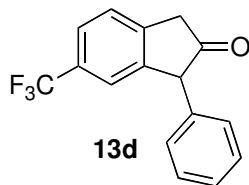

Purification: SiO<sub>2</sub>(5% EtOAc in hexanes) afforded **13d** (72%).

*See spectra on pages S55 and S56*

<sup>1</sup>H NMR: (400 MHz, CDCl<sub>3</sub>)

7.63-7.26 (m, 7H); 7.11 (dd, *J*=9.2 Hz, 1H); 4.75 (m, 1H); 3.72 (s, 2H)

<sup>13</sup>C NMR: (100 MHz, CDCl<sub>3</sub>)

212.3; 142.2; 137.2; 130.5; 130.2; 129.0; 128.4; 128.1; 127.2; 126.4;  
125.0; 123.0; 122.9; 122.7; 59.6; 42.8.

HRMS (ESI): calculated for C<sub>16</sub>H<sub>11</sub>F<sub>3</sub>NaO 299.0660, found 299.0598 (M+Na)<sup>+</sup>

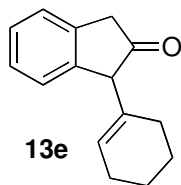

Purification: SiO<sub>2</sub>(5% EtOAc in hexanes) afforded **13e** (95%).

*See spectra on pages S57 and S58*

<sup>1</sup>H NMR: (400 MHz, CDCl<sub>3</sub>)

7.30-7.24 (m, 4H); 5.54 (s, 1H); 3.98 (s, 1H); 3.53 (s, 2H); 1.67-1.49 (m, 8H).

<sup>13</sup>C NMR: (100 MHz, C<sub>6</sub>D<sub>6</sub>)

215.8; 141.3; 137.3; 134.7; 127.6; 127.5; 127.0; 125.3; 124.7; 62.3; 43.4;  
26.1; 25.4; 22.7; 22.1.

HRMS (ESI): calculated for C<sub>15</sub>H<sub>16</sub>NaO 235.1099, found 235.1174 (M+Na)<sup>+</sup>

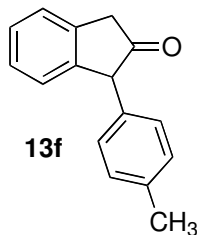

Purification: SiO<sub>2</sub>(5% EtOAc in hexanes) afforded **13f** (90%).

*See spectra on pages S59 and S60*

<sup>1</sup>H NMR: (400 MHz, CDCl<sub>3</sub>)

7.38-7.30 (m, 3H); 7.21 (d, *J*=7.2 Hz, 1H); 7.14 (d, *J*=7.6 Hz, 2H); 7.02 (d, *J*=8.0 Hz, 2H); 4.63 (s, 1H); 3.65 (s, 2H); 2.34 (s, 3H).

<sup>13</sup>C NMR: (100 MHz, CDCl<sub>3</sub>)

214.2; 141.5; 137.2; 137.0; 135.2; 129.5; 128.5; 128.3; 127.9; 127.8; 126.0; 124.8; 59.4; 42.9; 21.1.

HRMS (ESI): calculated for C<sub>16</sub>H<sub>14</sub>NaO 245.0942, found 245.0921 (M+Na)

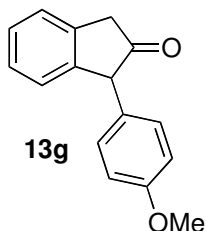

Purification: SiO<sub>2</sub>(10% EtOAc in hexanes) afforded **13g** (88%).

*See spectra on pages S61 and S62*

<sup>1</sup>H NMR: (400 MHz, CDCl<sub>3</sub>)

7.38-7.20 (m, 5H); 7.05 (d, *J*=6.4 Hz, 2H); 6.87 (d, *J*=6.4 Hz, 2H); 4.63 (s, 1H); 3.78 (s, 3H); 3.66 (s, 2H).

<sup>13</sup>C NMR: (100 MHz, CDCl<sub>3</sub>)

214.4; 158.9; 141.6; 137.2; 130.3; 129.5; 128.3; 127.9; 127.8; 126.0; 124.8; 114.2; 58.9; 55.2; 42.8.

HRMS (ESI): calculated for C<sub>16</sub>H<sub>14</sub>NaO<sub>2</sub> 261.0891, found 261.0664 (M+Na)<sup>+</sup>

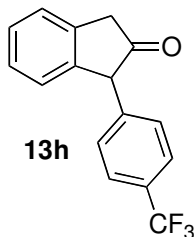

Purification: SiO<sub>2</sub>(5% EtOAc in hexanes) afforded **13h** (91%).

*See spectra on pages S63 and S64*

<sup>1</sup>H NMR: (400 MHz, CDCl<sub>3</sub>)

8.06 (d, *J*=8.0 Hz, 1H); 7.75 (d, *J*=8.4 Hz, 2H); 7.61 (d, *J*=8.0 Hz, 2H);  
7.45-7.18 (m, 5H); 4.71 (s, 1H); 3.73 (m, 2H).

<sup>13</sup>C NMR: (100 MHz, CDCl<sub>3</sub>)

212.9, 140.2; 136.7; 129.8; 129.4; 128.9; 128.5; 128.2; 126.9; 125.9;  
125.7; 125.6; 125.4; 59.4; 42.8.

HRMS (ESI): calculated for C<sub>16</sub>H<sub>11</sub>F<sub>3</sub>NaO 299.0659, found 299.0721 (M+Na)<sup>+</sup>

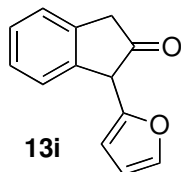

Purification: SiO<sub>2</sub>(10% EtOAc in hexanes) afforded **13i** (62%).

*See spectra on pages S65 and S66*

<sup>1</sup>H NMR: (400 MHz, CDCl<sub>3</sub>)

7.39-7.27 (m, 5H); 6.35 (m, 1H); 6.16 (m, 1H); 4.82 (s, 1H); 3.72 (d,  
*J*=8.0 Hz, 2H).

<sup>13</sup>C NMR: (100 MHz, CDCl<sub>3</sub>)

211.4; 150.5; 142.7; 136.9; 128.3; 127.8; 125.6; 124.9; 110.4; 107.8; 53.3;  
42.9.

HRMS (ESI): calculated for C<sub>13</sub>H<sub>10</sub>NaO<sub>2</sub> 221.0578, found 221.0842 (M+Na)<sup>+</sup>



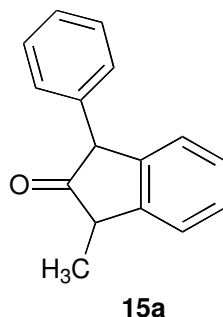

Purification: SiO<sub>2</sub> (10% Et<sub>2</sub>O in hexanes) afforded **15a** (61%) (dr = 1:1).

*See spectra on pages S67 and S68*

<sup>1</sup>H NMR: (400 MHz, CDCl<sub>3</sub>)

7.41-7.26 (m, 6H); 7.18-7.10 (m, 3H); 4.70 (s, 1H); 3.61 (q, *J*=4.2 Hz, 1H); 1.48 (d, *J*=5.6 Hz, 3H);

<sup>13</sup>C NMR: (100 MHz, CDCl<sub>3</sub>)

216.4; 143.2; 140.1; 138.3; 128.9; 128.6; 128.0; 127.6; 126.0; 124.2; 59.0; 46.7; 15.8.

HRMS (ESI): calculated for C<sub>16</sub>H<sub>14</sub>NaO 245.0942, found 245.4017 (M+Na)<sup>+</sup>.

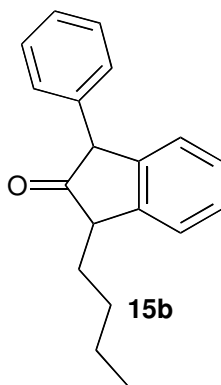

Purification: SiO<sub>2</sub> (10% Et<sub>2</sub>O in hexanes) afforded **15b** (53%) (dr= 4:1).

*See spectra on pages S69 and S70*

<sup>1</sup>H NMR: (400 MHz, CDCl<sub>3</sub>)

7.33-7.21 (m, 9H), 4.42 (s, 1H), 3.34 (t, *J*=5.4Hz, 1H), 1.86 (m, 2H), 1.41-1.19 (m, 4H), 0.80 (t, *J*=6.0, 3H);

<sup>13</sup>C NMR: (100 MHz, CDCl<sub>3</sub>)

214.2; 142.3; 141.0; 128.9; 128.5; 128.0; 127.7; 127.5; 58.9; 52.0; 31.2; 28.8; 22.7; 19.6.

HRMS (ESI): calculated for C<sub>19</sub>H<sub>20</sub>NaO 287.1412, found 287.1361 (M+Na)<sup>+</sup>.

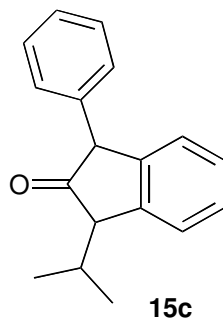

Purification: SiO<sub>2</sub> (10% Et<sub>2</sub>O in hexanes) afforded **15c** (48%) (dr= 2:1).

*See spectra on pages S71 and S72*

<sup>1</sup>H NMR: (400 MHz, CDCl<sub>3</sub>)

7.24-7.01 (m, 9H); 4.38 (s, 1H); 3.25 (d, *J*=3.6Hz, 1H); 2.29 (m, *J*=4.0Hz, 1H); 1.01 (d, *J*=6.4Hz, 3H); 0.89 (d, *J*=6.4Hz, 3H).

<sup>13</sup>C NMR: (100 MHz, CDCl<sub>3</sub>)

213.8; 141.3; 140.9; 138.0; 128.9; 128.4; 128.0; 127.7; 127.5; 126.9; 126.1; 124.7; 58.9; 58.0; 31.2; 19.9; 19.6.

HRMS (ESI): calculated for C<sub>18</sub>H<sub>18</sub>NaO 273.1255, found 273.1271 (M+Na)<sup>+</sup>.

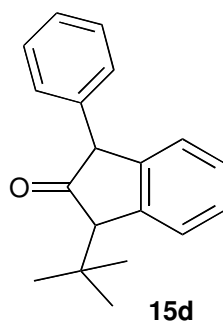

Purification: SiO<sub>2</sub> (10% Et<sub>2</sub>O in hexanes) afforded **15d** (69%) (cis:trans = >95:5).

*See spectra on pages S73 and S74 and NOESY S75 and S76*

<sup>1</sup>H NMR: (400 MHz, CDCl<sub>3</sub>)

7.42 (d, *J*=10.0 Hz, 2H); 7.31 (m, 1H); 7.20-7.09 (m, 6H); 4.40 (s, 1H), 3.09 (s, 1H), 0.99 (s, 9H).

<sup>13</sup>C NMR: (100 MHz, CDCl<sub>3</sub>)

213.3; 141.3; 140.7; 138.6; 128.5; 128.0; 127.9; 127.6; 127.3; 126.6; 62.3; 58.6; 35.0; 30.5; 28.6.

HRMS (ESI): calculated for C<sub>19</sub>H<sub>20</sub>NaO 287.1412, found 287.1438 (M+Na)<sup>+</sup>.

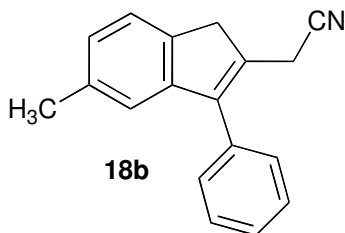

Purification: SiO<sub>2</sub> (5% EtOAc in hexanes) afforded **16b** (91%)

*See spectra on pages S77 and S78*

<sup>1</sup>H NMR: (400 MHz, CDCl<sub>3</sub>)

7.53-7.35 (m, 6H); 7.09-7.05 (m, 2H); 3.63 (s, 2H); 3.55 (s, 2H); 2.35 (s, 3H)

<sup>13</sup>C NMR: (100 MHz, CDCl<sub>3</sub>)

144.8; 139.1; 136.4; 133.6; 130.5; 128.9; 128.8; 128.1; 126.5; 123.6; 121.2; 40.2; 21.5; 17.9

HRMS (ESI): calculated for C<sub>18</sub>H<sub>15</sub>NNa 268.1102, found 268.1099 (M+Na)<sup>+</sup>.

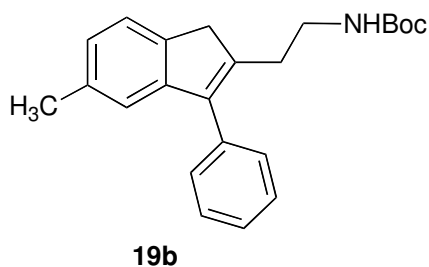

Purification: SiO<sub>2</sub> (10% EtOAc in hexanes) afforded **17b** (60%)

*See spectra on pages S79 and S80*

<sup>1</sup>H NMR: (400 MHz, CDCl<sub>3</sub>)

7.49-7.35 (m, 6H); 7.00 (m, 2H); 3.47 (s, 2H); 3.35 (m, 2H); 2.71 (t, *J*=6.8 Hz, 2H); 2.34 (s, 3H); 1.41 (s, 9H).

<sup>13</sup>C NMR: (100 MHz, CDCl<sub>3</sub>)

155.7; 146.3; 141.1; 138.0; 135.2; 129.1; 128.5; 128.3; 127.3; 125.3; 123.3; 120.4; 100.0; 79.2; 40.2; 40.0; 29.4; 28.3; 21.5

HRMS (ESI): calculated for C<sub>23</sub>H<sub>27</sub>NNaO<sub>2</sub> 372.1939, found 372.1763 (M+Na)<sup>+</sup>.

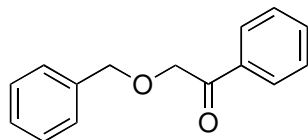

**3a**

$^1\text{H}$  NMR,  $\text{CDCl}_3$ , 400MHz

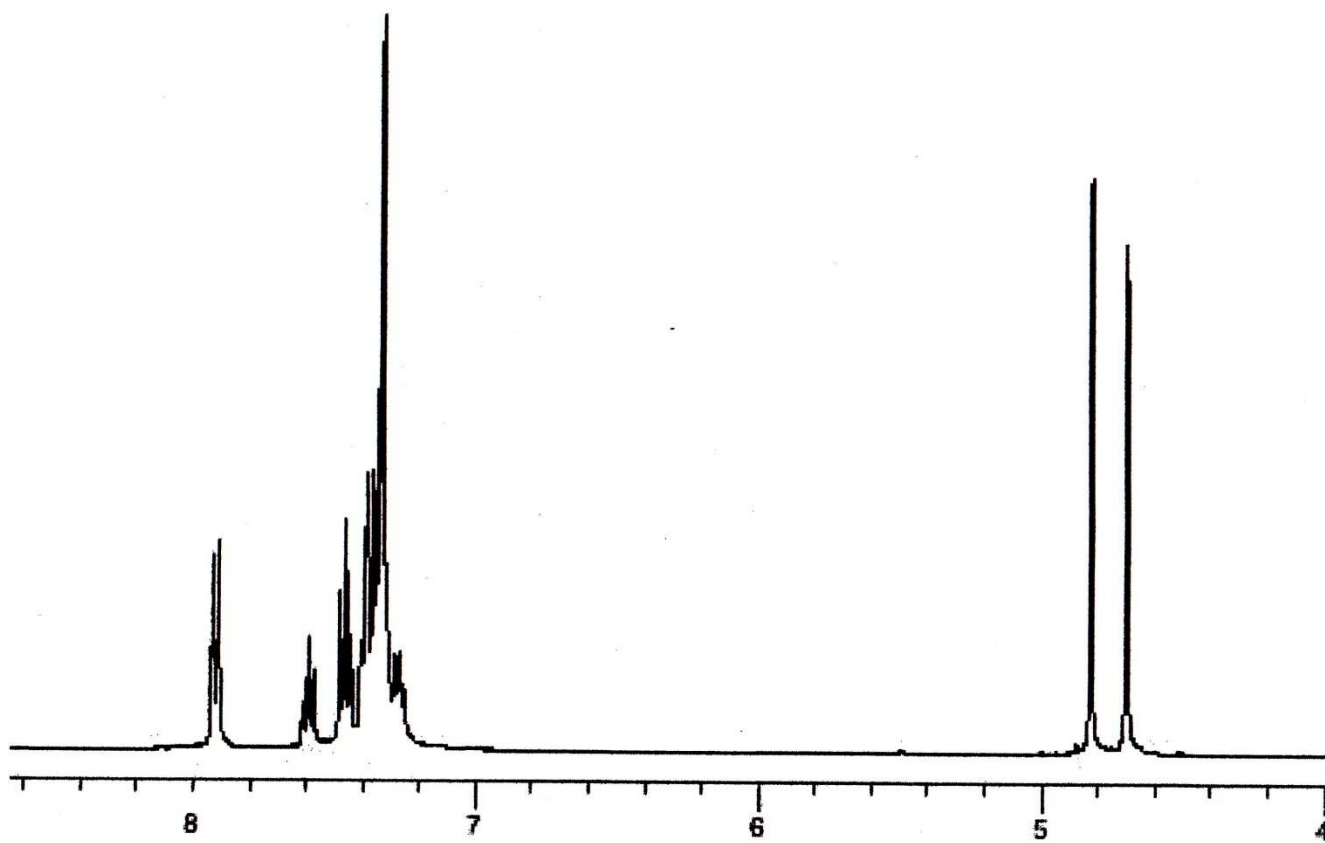

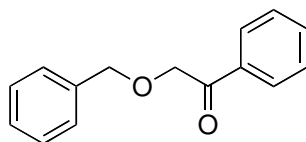

**3a**

$^{13}\text{C}$  NMR,  $\text{CDCl}_3$ , 100MHz

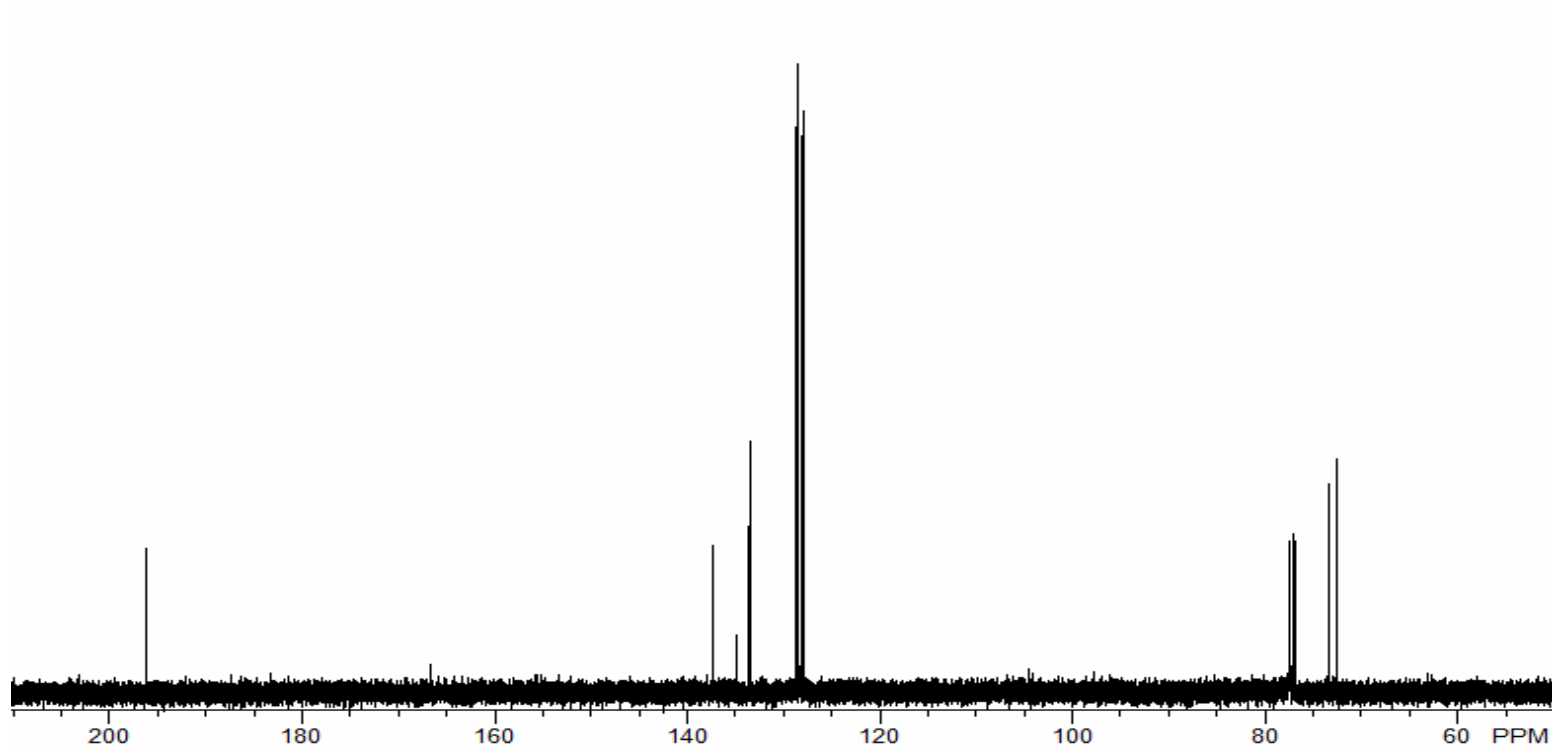

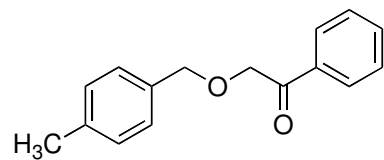

**3b**

$^1\text{H NMR}$ ,  $\text{CDCl}_3$ , 400MHz

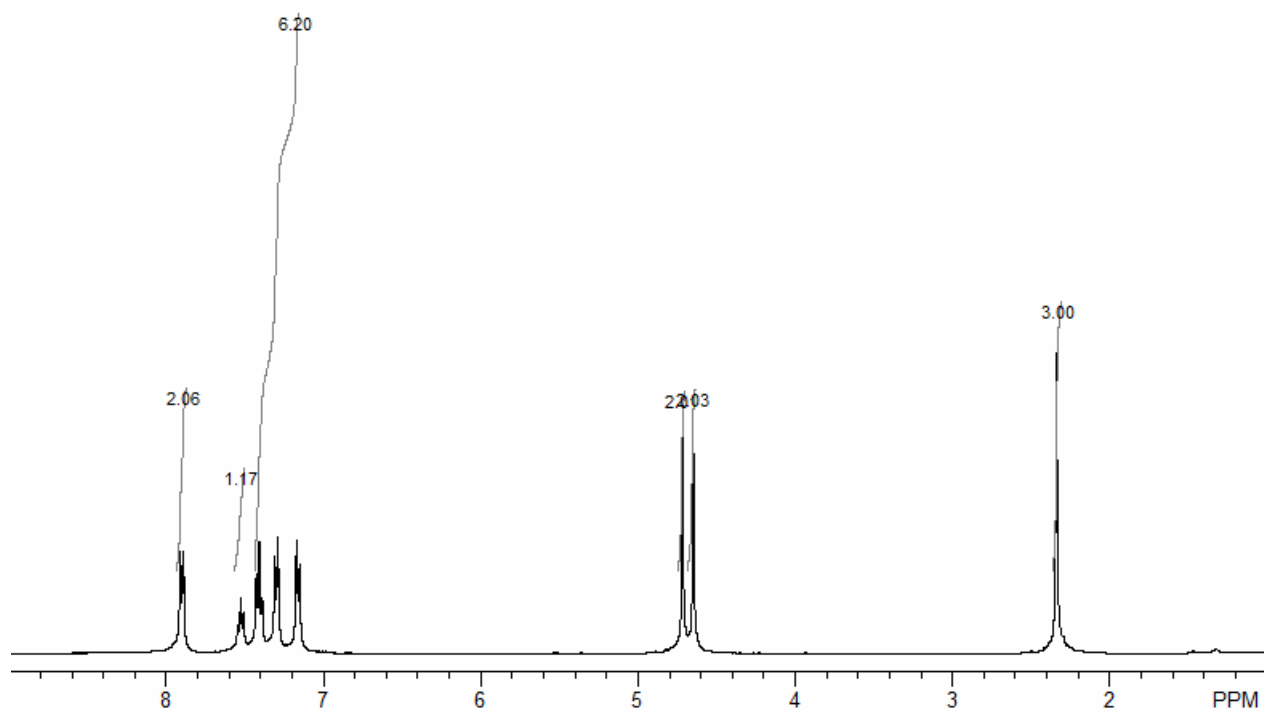

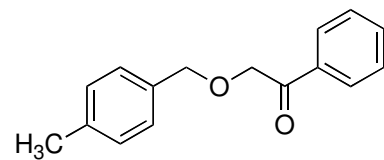

**3b**

$^{13}\text{C}$  NMR,  $\text{CDCl}_3$ , 100MHz

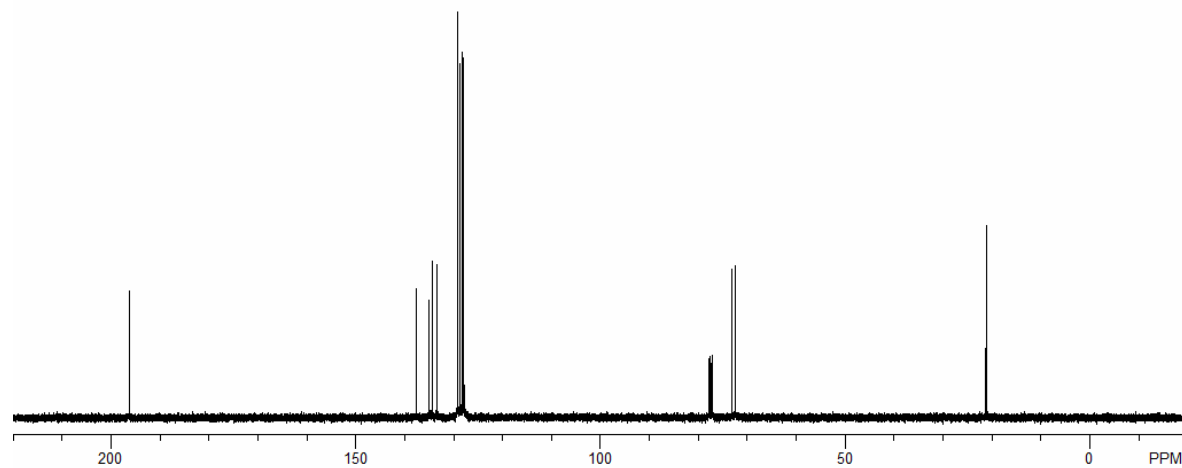

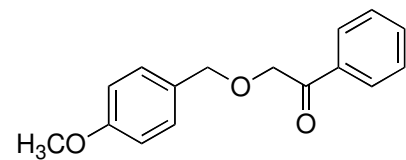

**3c**

<sup>1</sup>H NMR, CDCl<sub>3</sub>, 400MHz

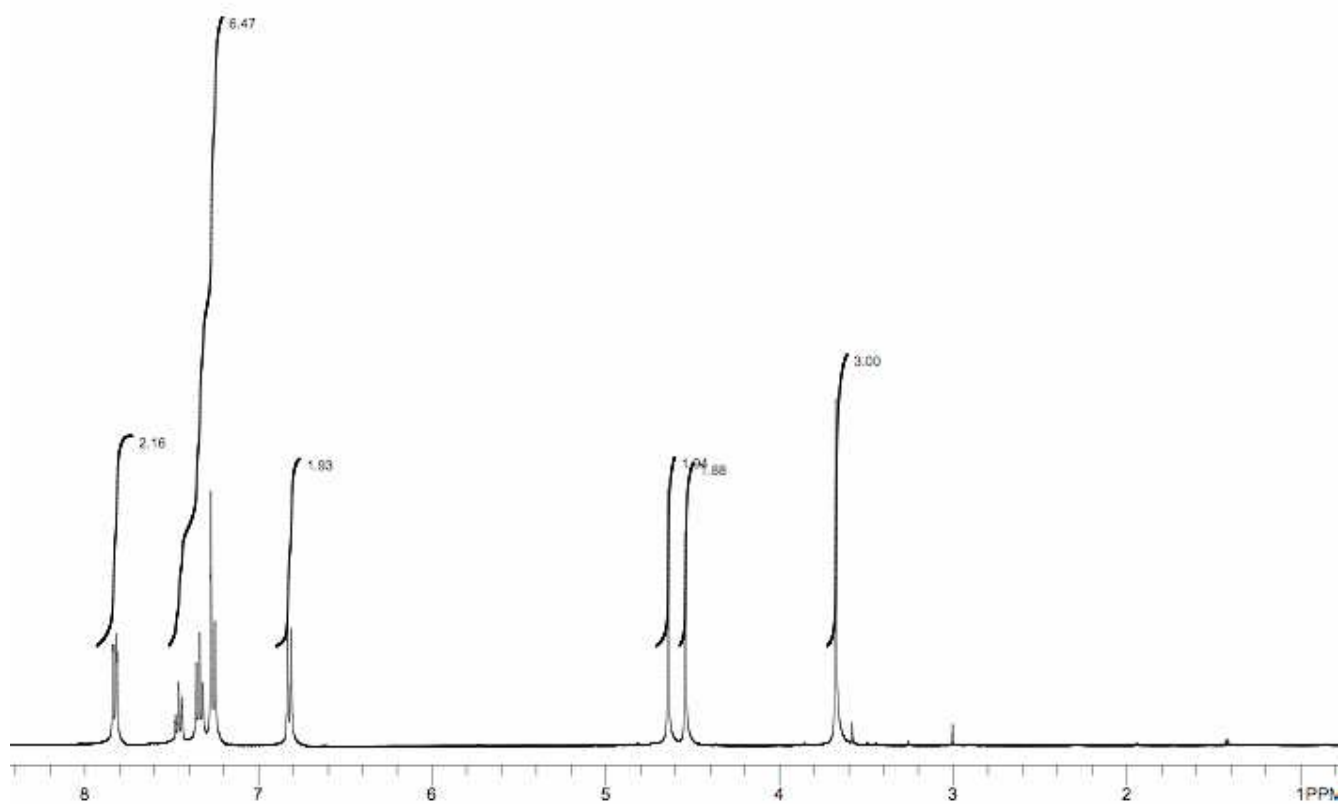



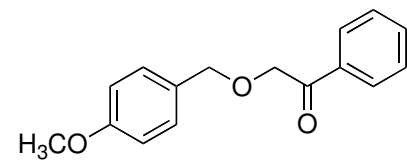

**3c**

$^{13}\text{C}$  NMR,  $\text{CDCl}_3$ , 100MHz

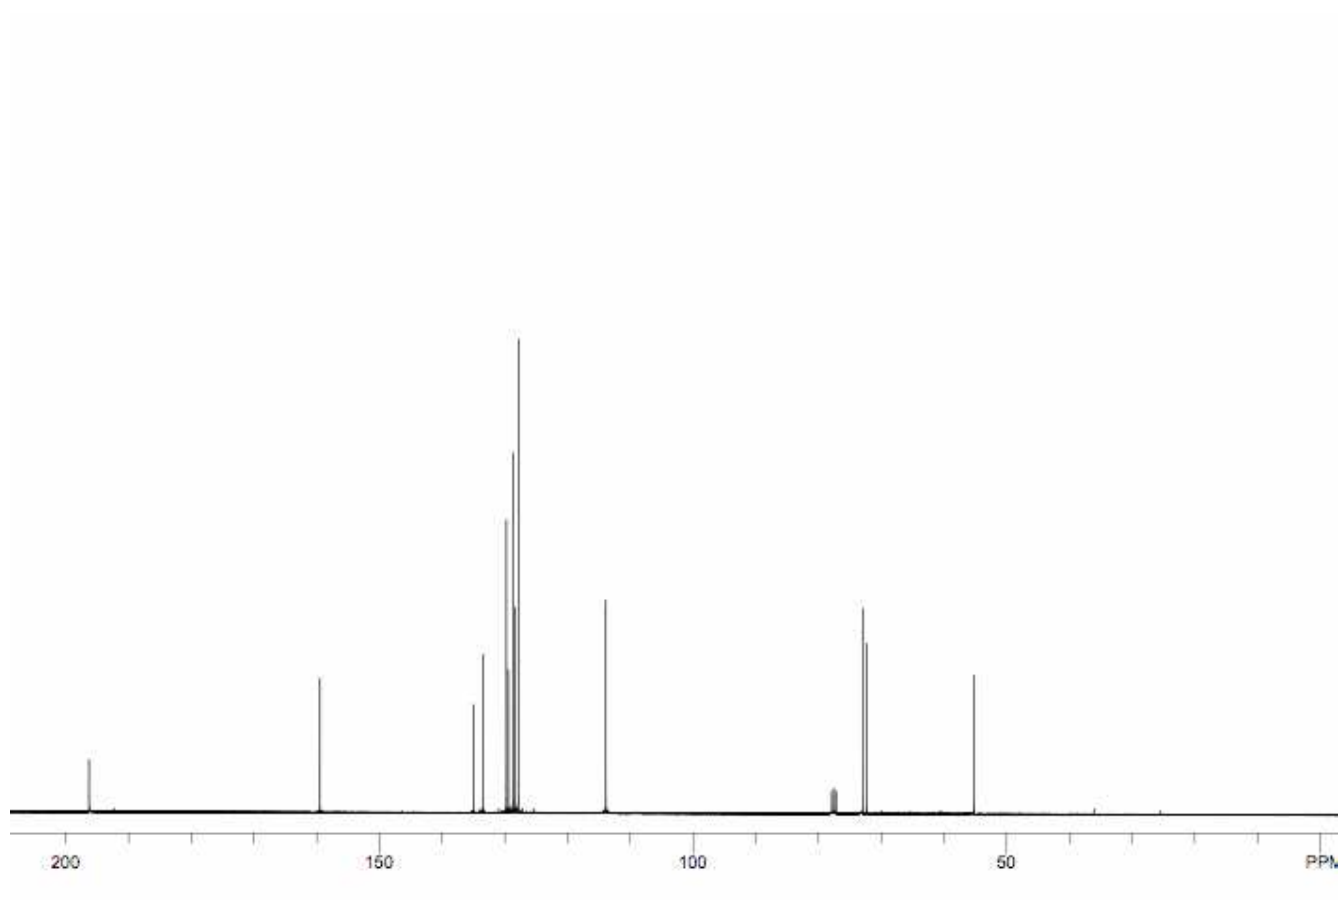

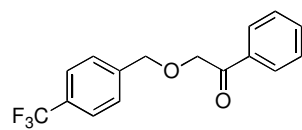

**3d**

$^1\text{H}$  NMR,  $\text{CDCl}_3$ , 400MHz

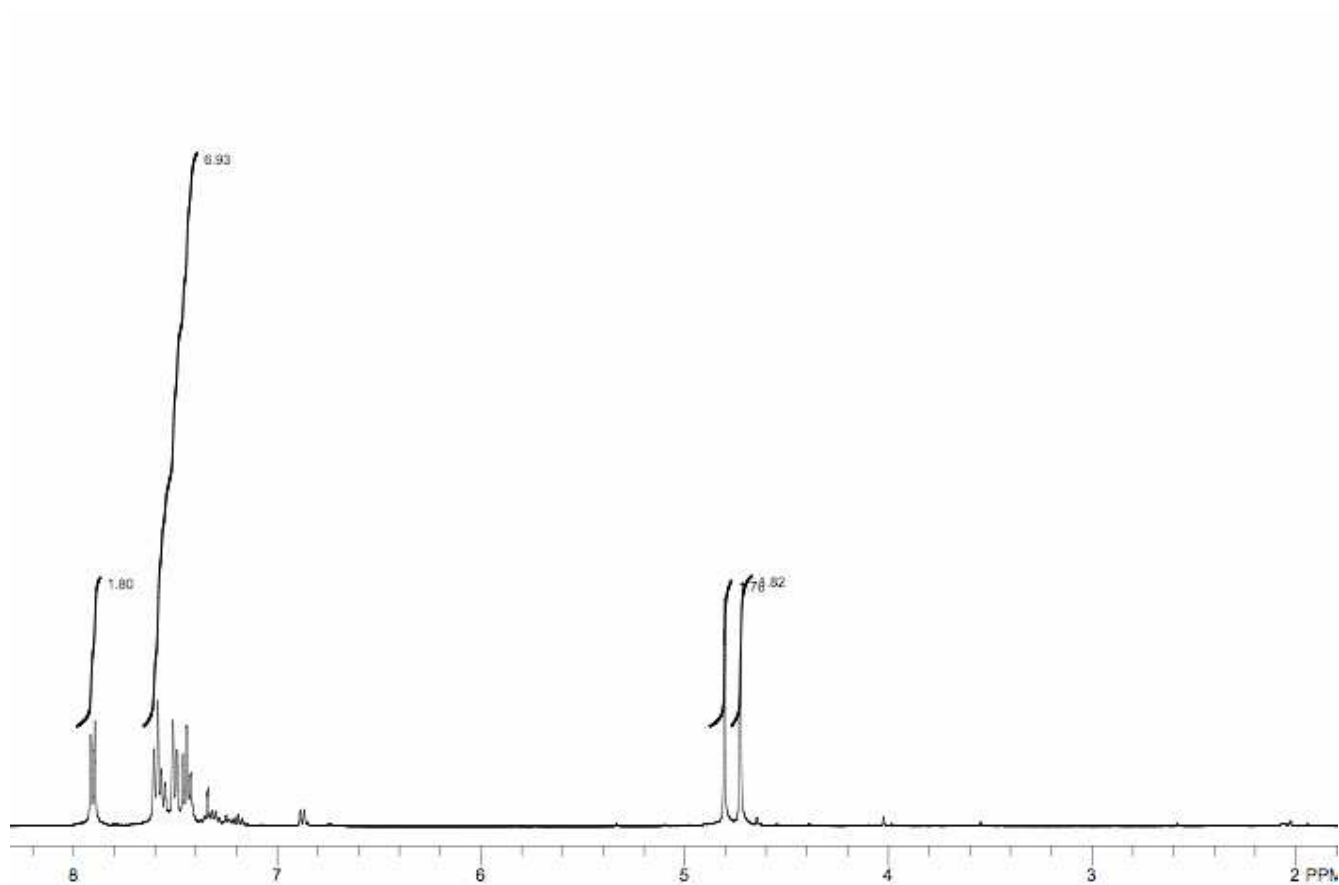

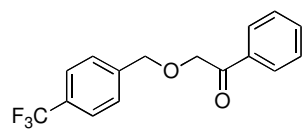

**3d**

$^{13}\text{C}$  NMR,  $\text{CDCl}_3$ , 100MHz

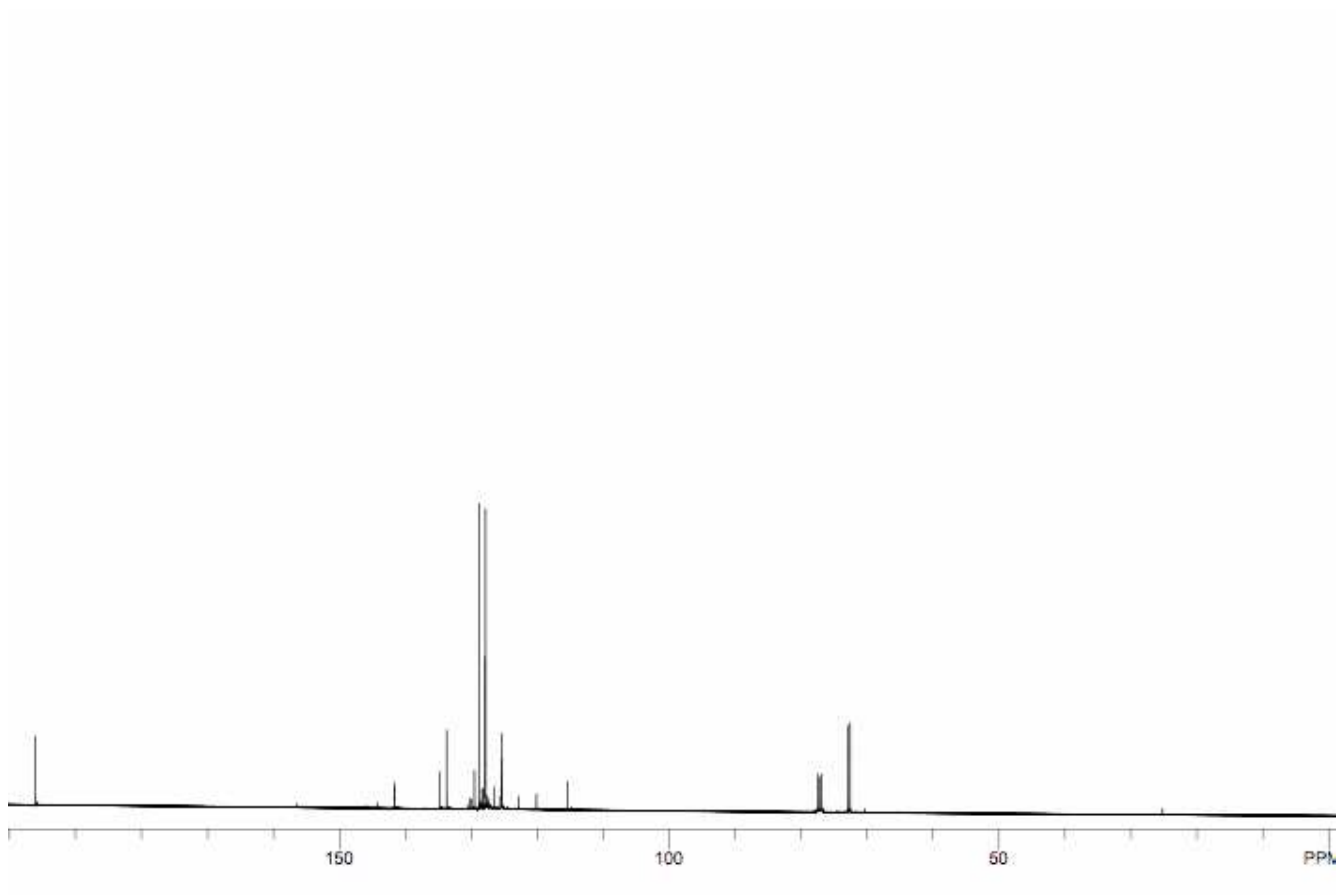

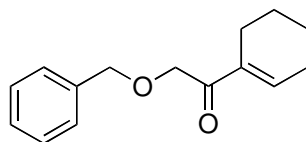

**3e**

$^1\text{H}$  NMR,  $\text{CDCl}_3$ , 400MHz

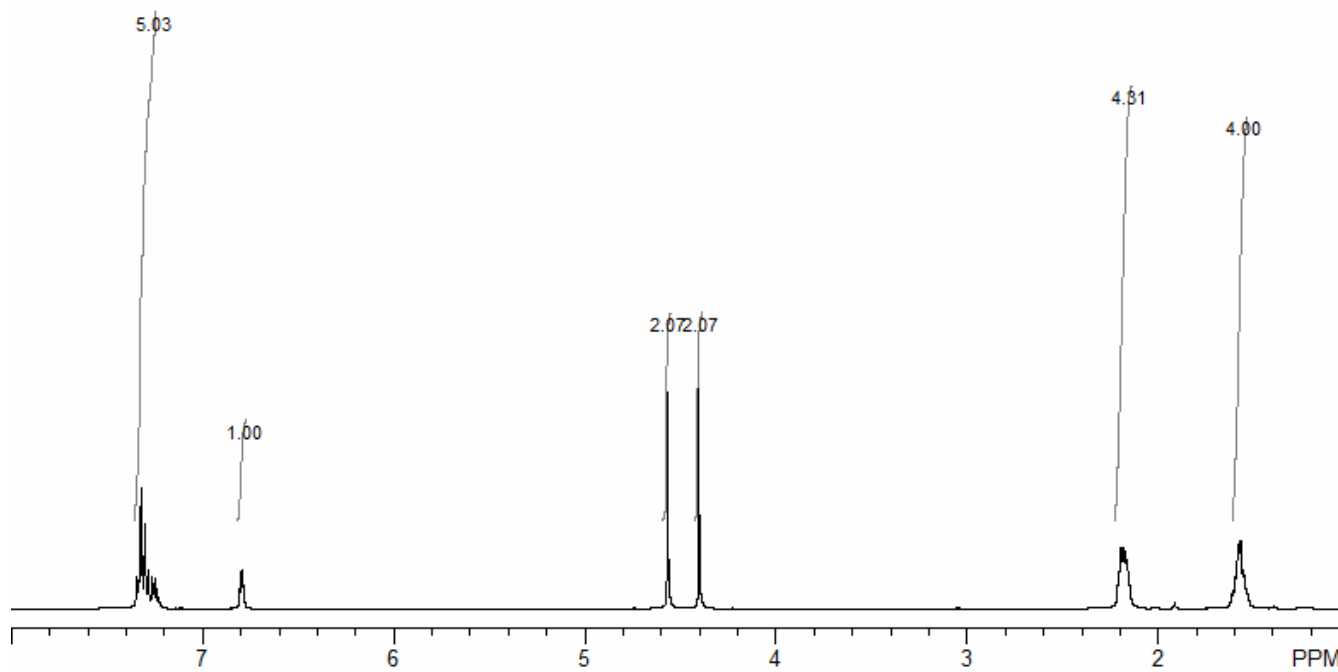

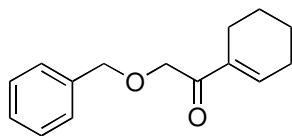

**3e**

$^{13}\text{C}$  NMR,  $\text{CDCl}_3$ , 100MHz

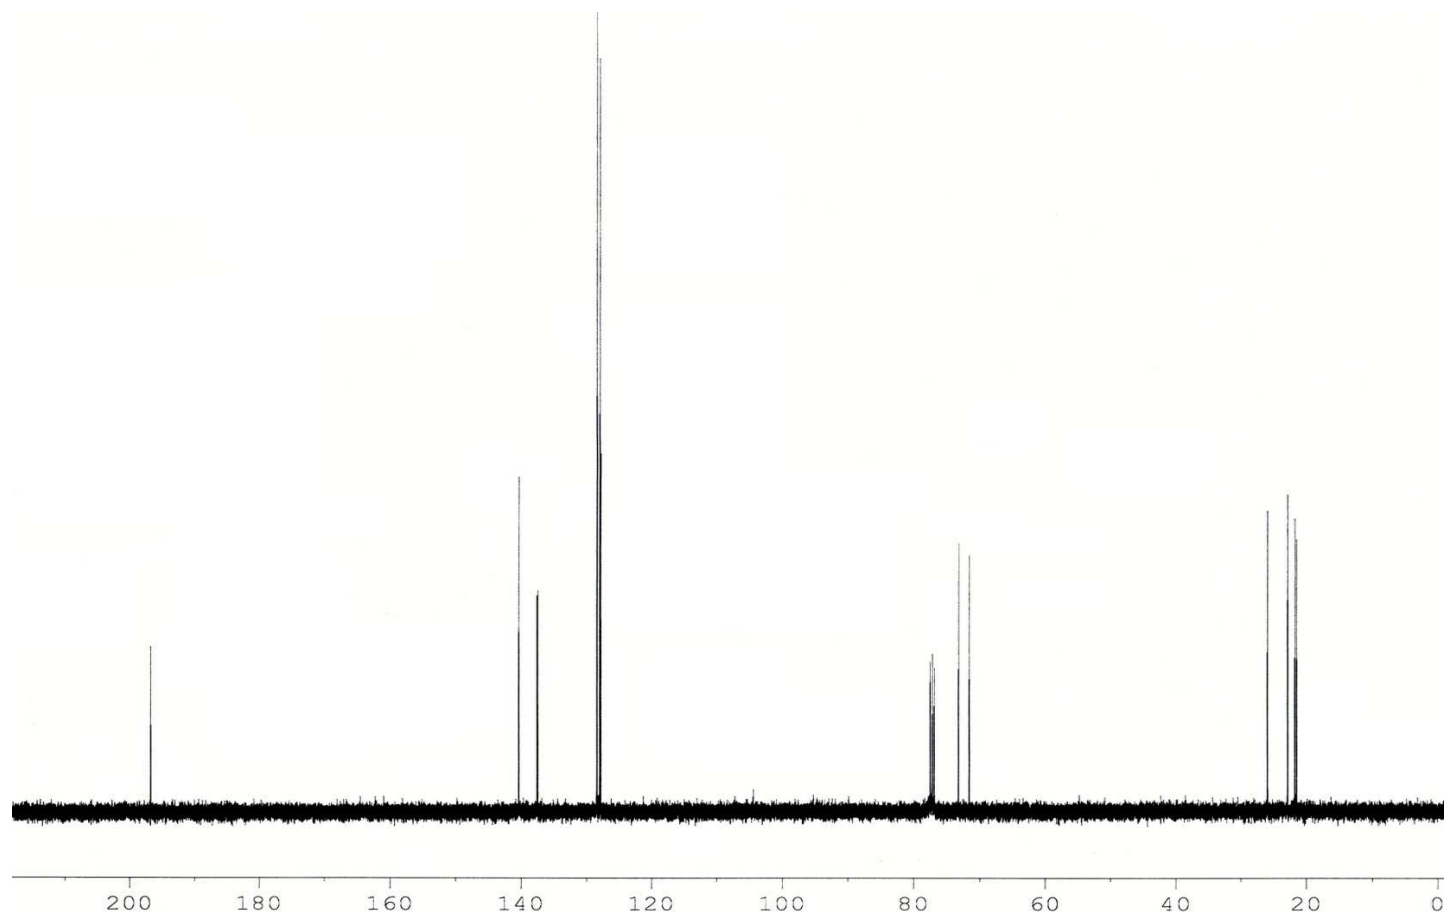

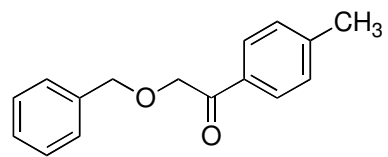

**3f**

$^1\text{H}$  NMR,  $\text{CDCl}_3$ , 400MHz

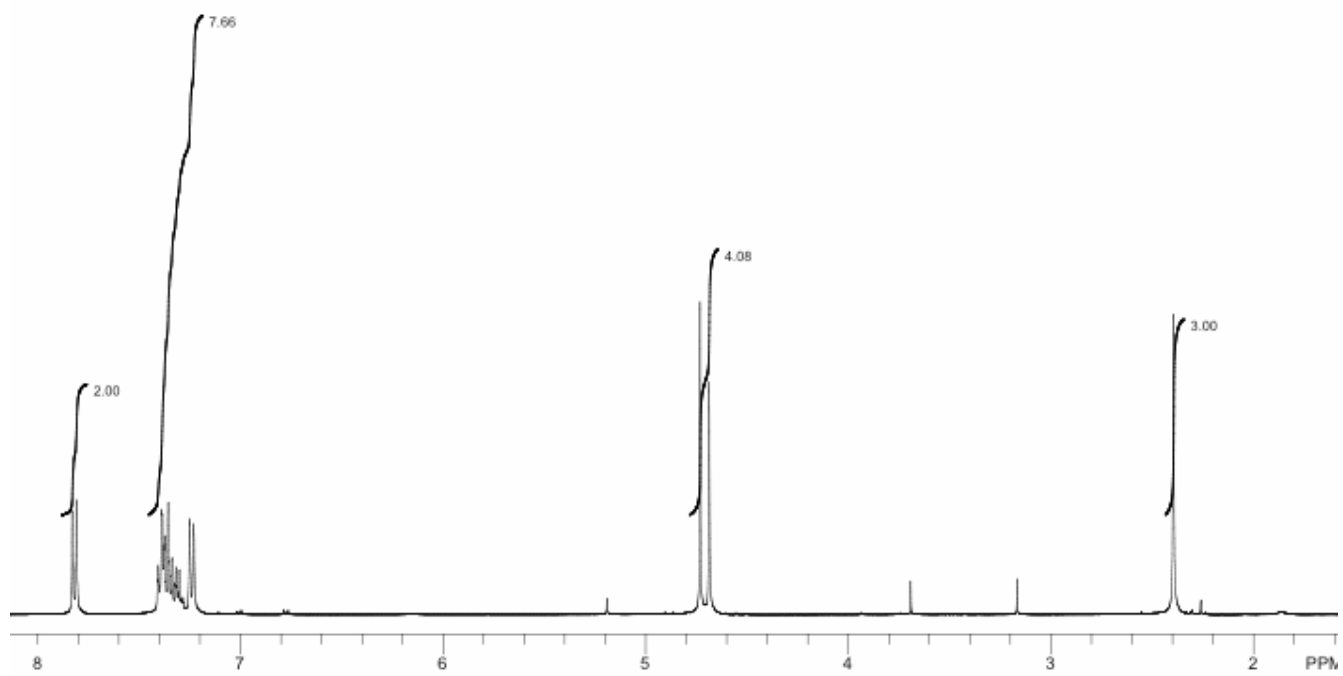

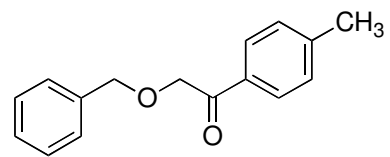

**3f**

$^{13}\text{C}$  NMR,  $\text{CDCl}_3$ , 100MHz

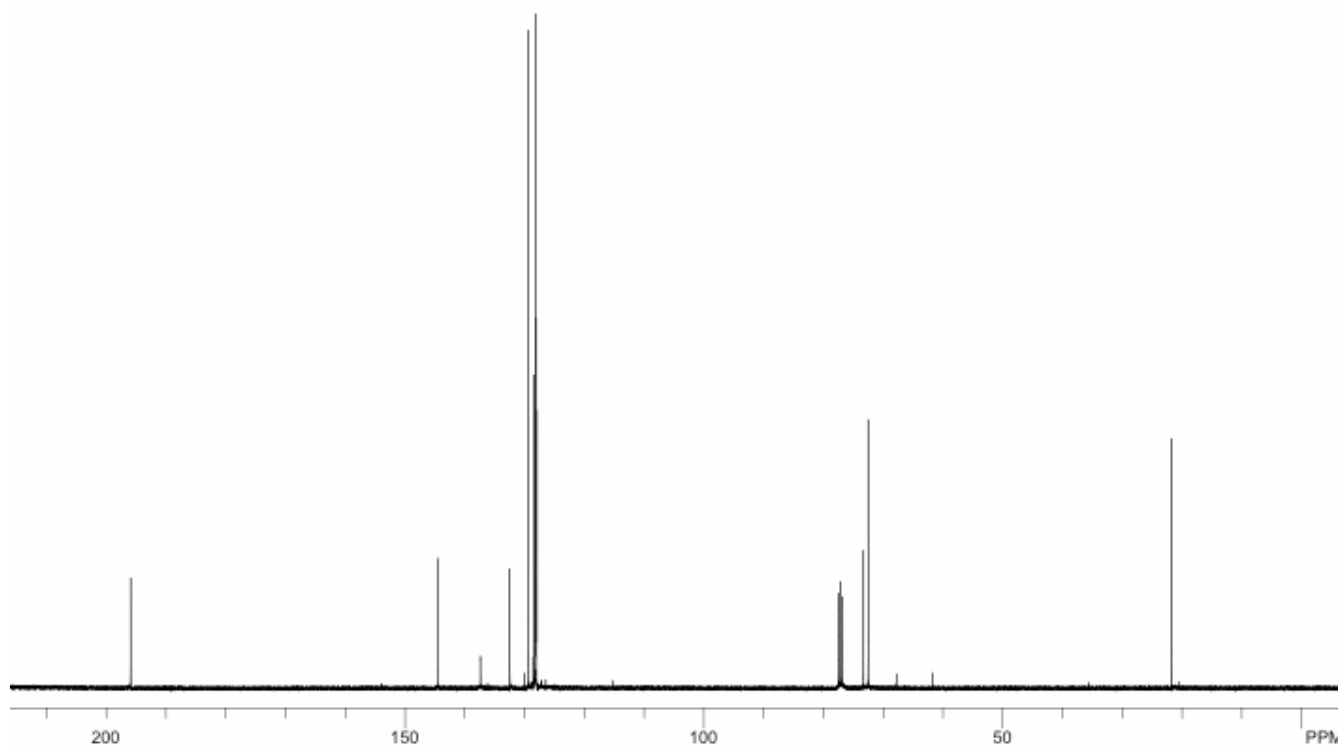

S30

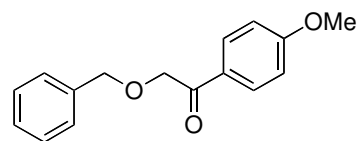

**3g**

$^1\text{H NMR}$ ,  $\text{CDCl}_3$ , 400MHz

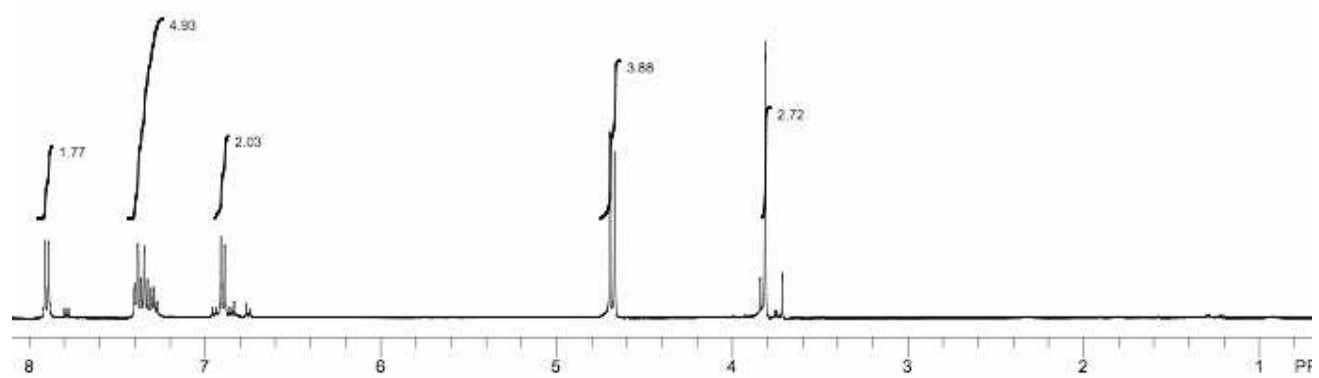



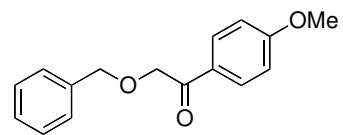

**3g**

$^{13}\text{C}$  NMR,  $\text{CDCl}_3$ , 100MHz

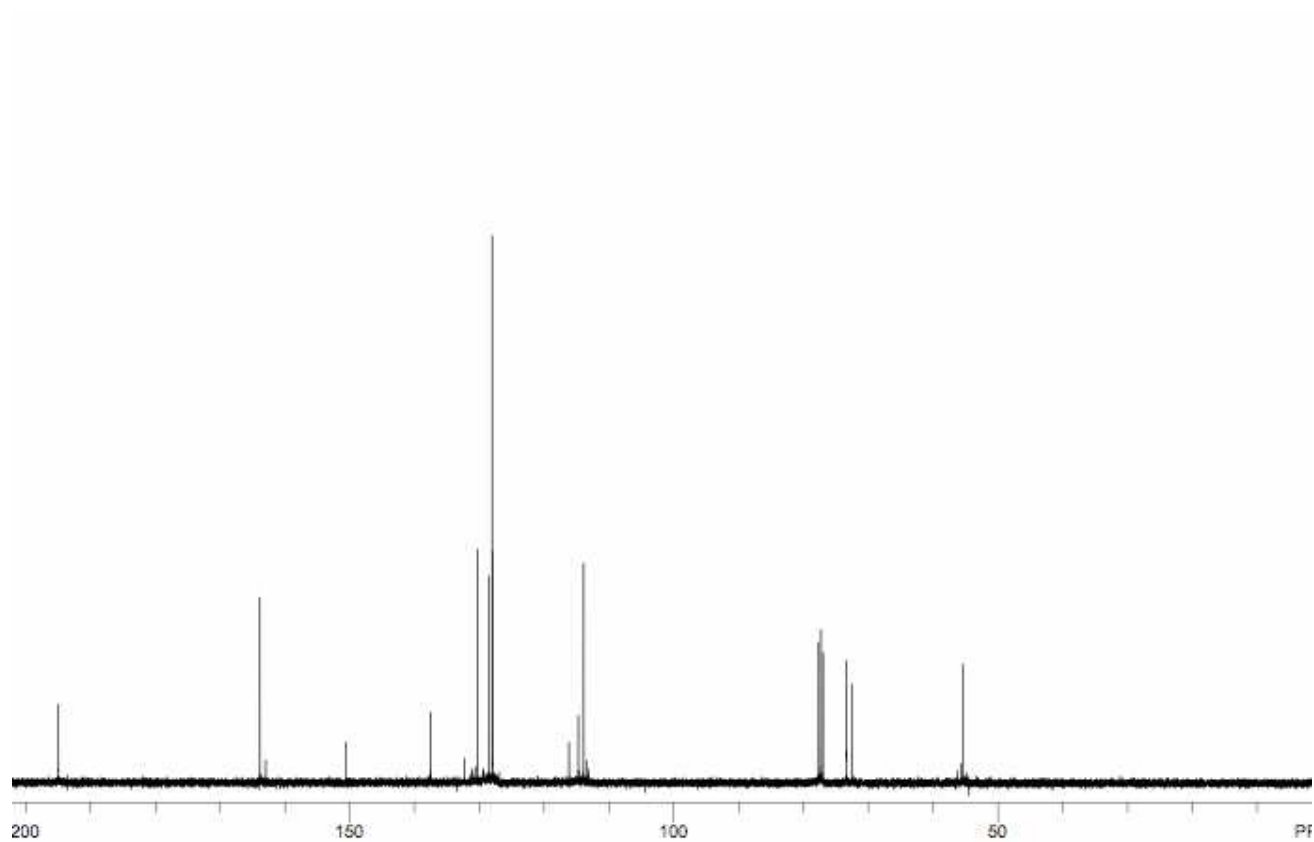

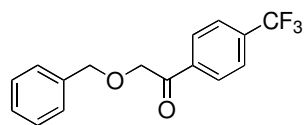

3h

$^1\text{H NMR}$ ,  $\text{CDCl}_3$ , 400MHz

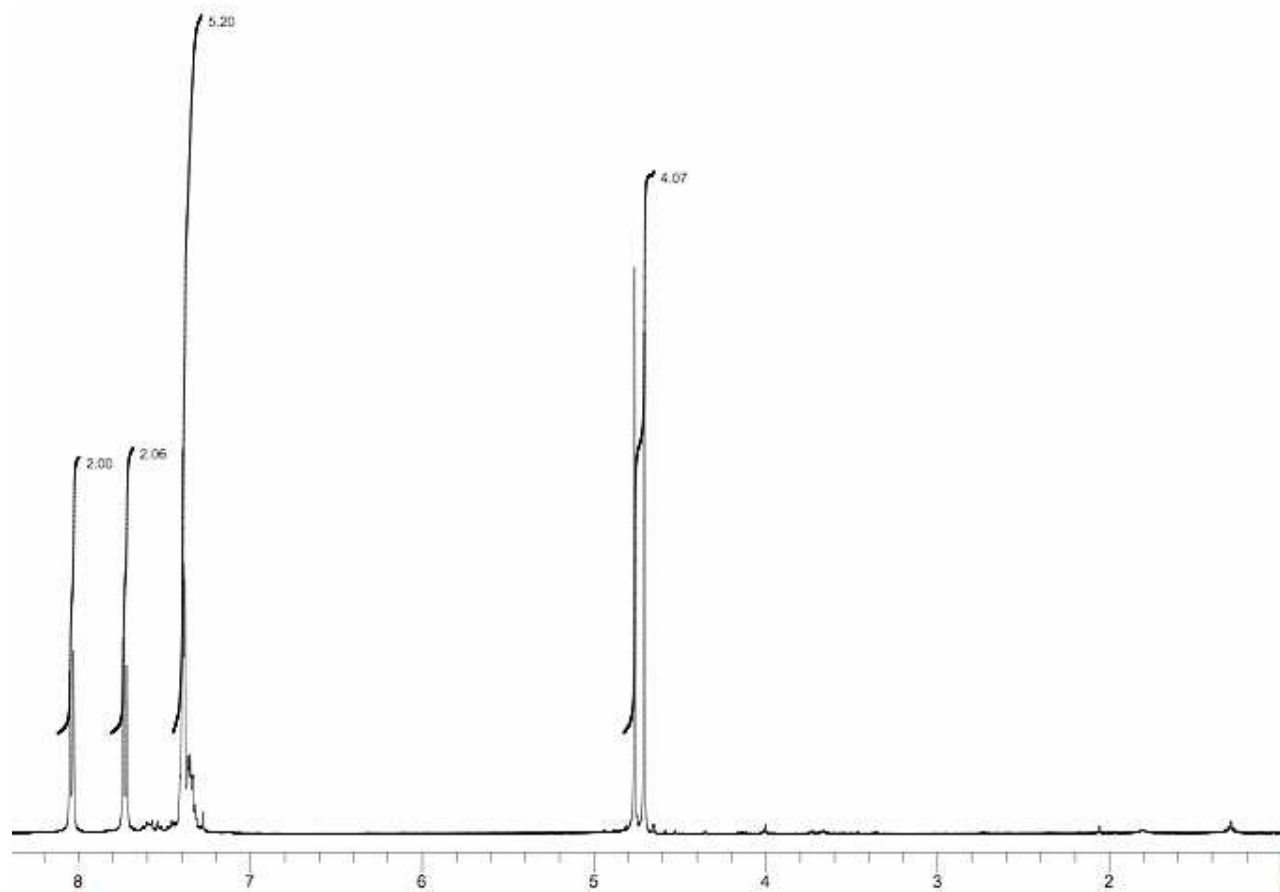

S33

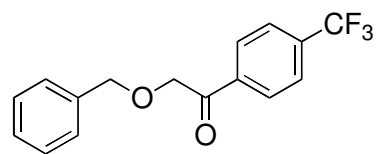

**3h**

$^{13}\text{C}$  NMR,  $\text{CDCl}_3$ , 100MHz

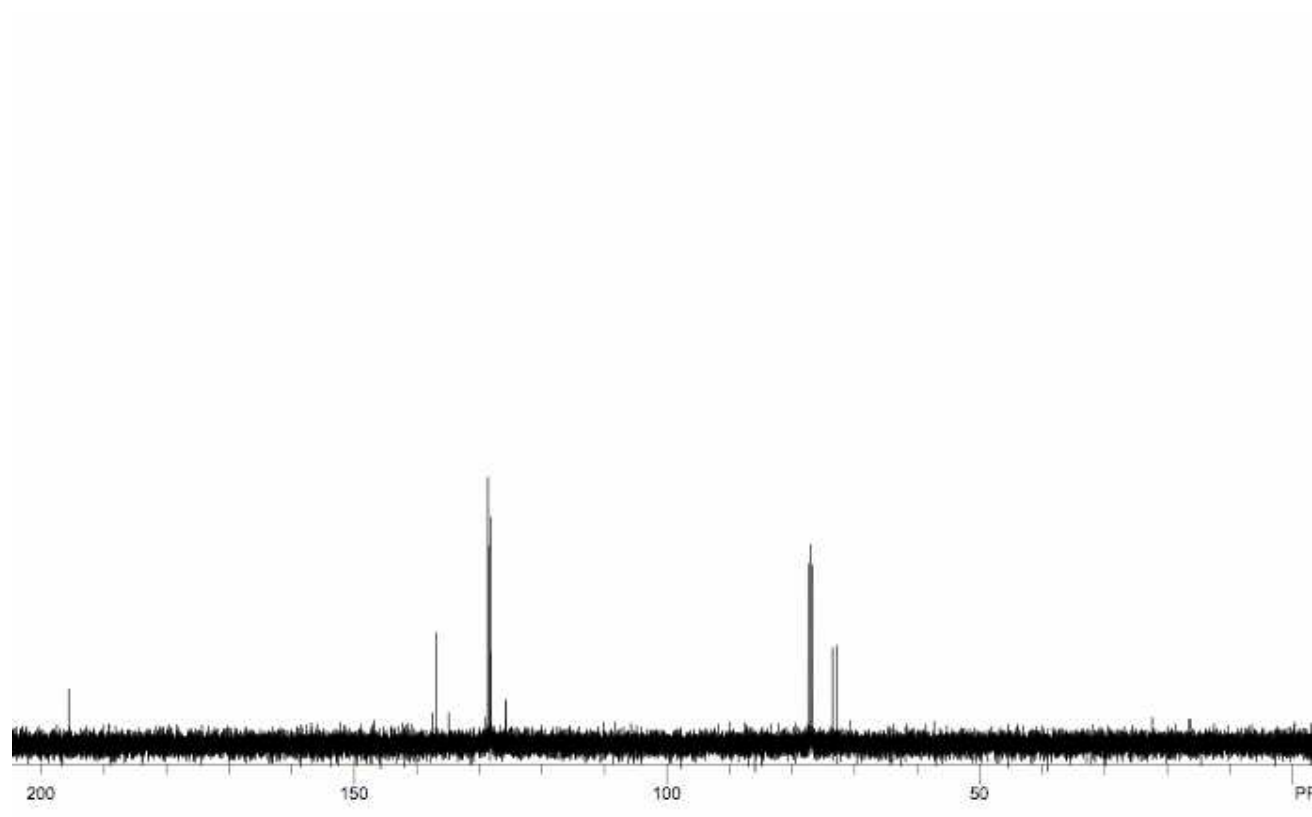

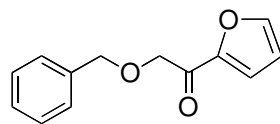

**3i**

$^1\text{H NMR}$ ,  $\text{CDCl}_3$ , 400MHz

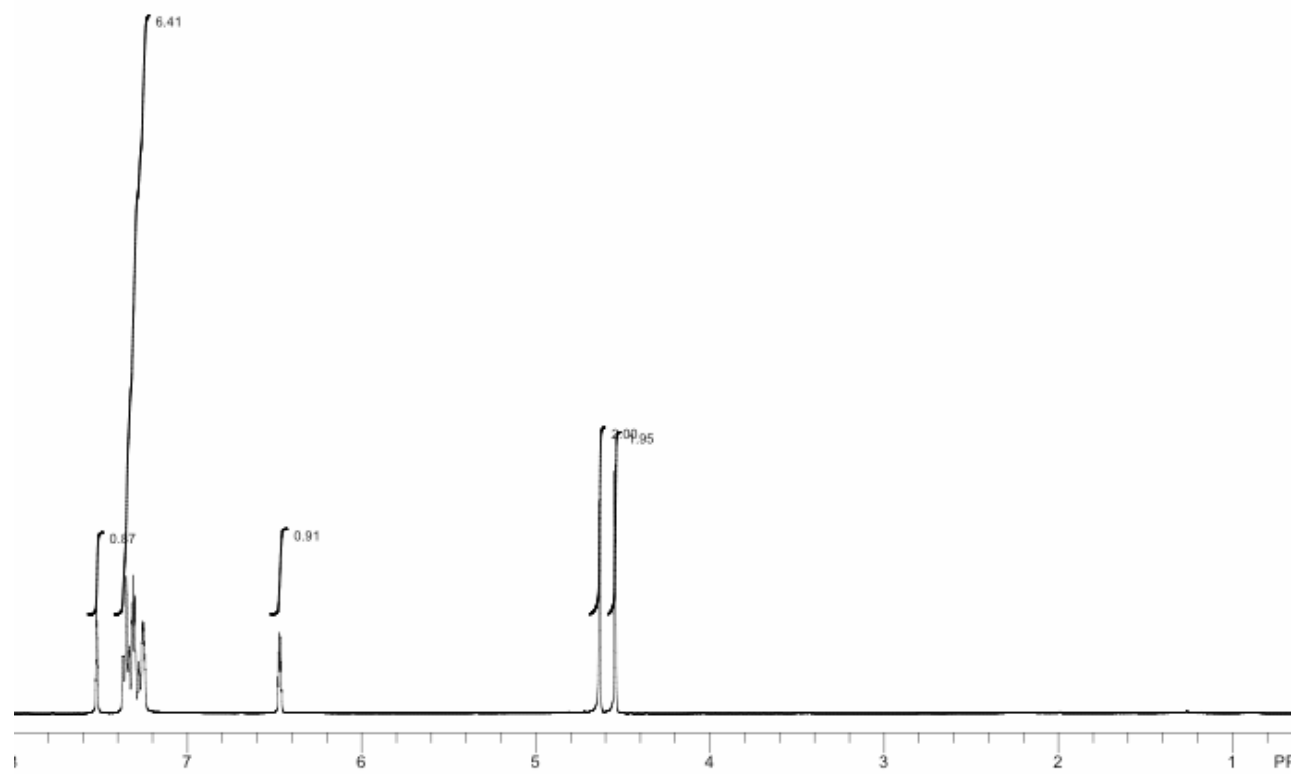

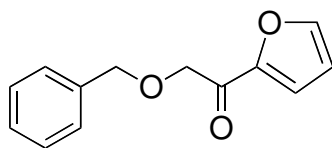

**3i**

$^{13}\text{C}$  NMR,  $\text{CDCl}_3$ , 100MHz

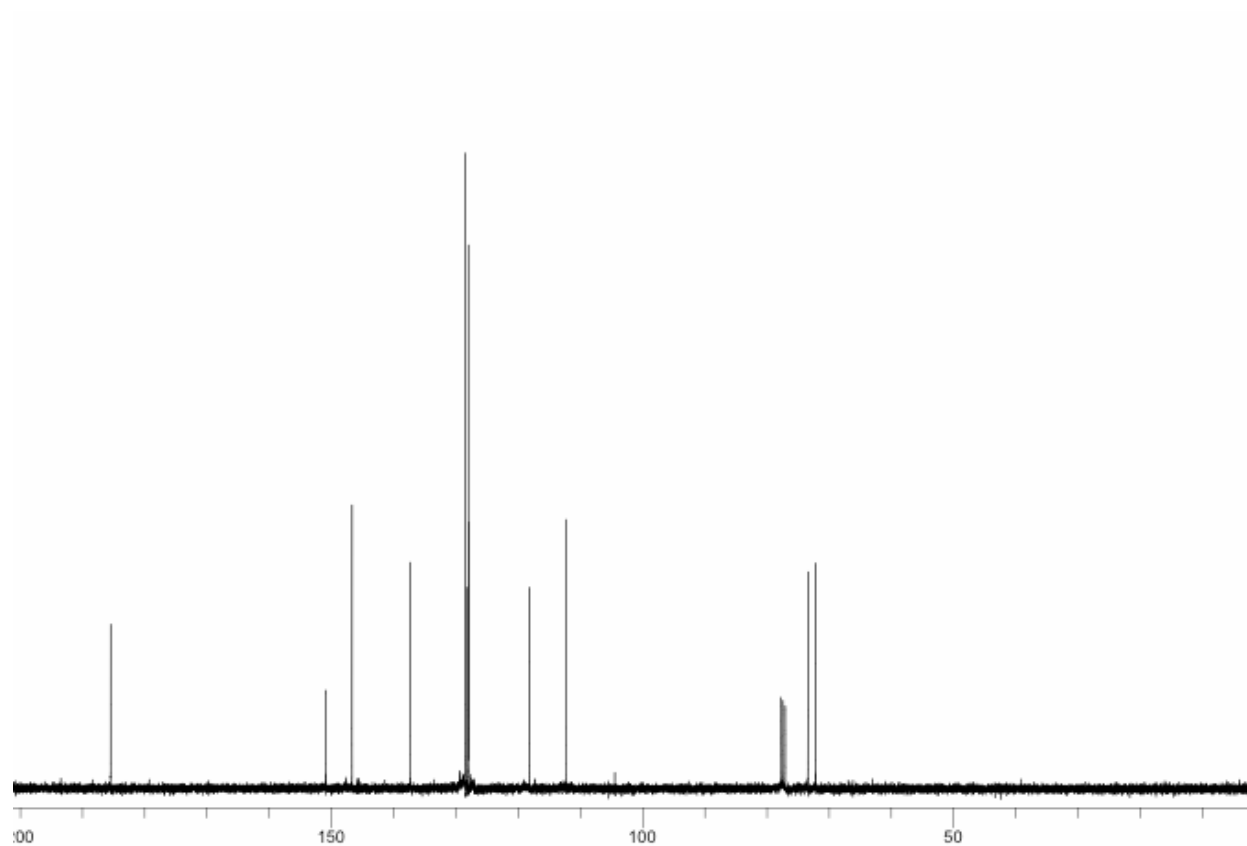

S36

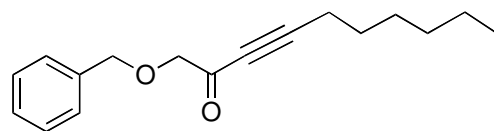

**3j**

$^1\text{H}$  NMR,  $\text{CDCl}_3$ , 400MHz

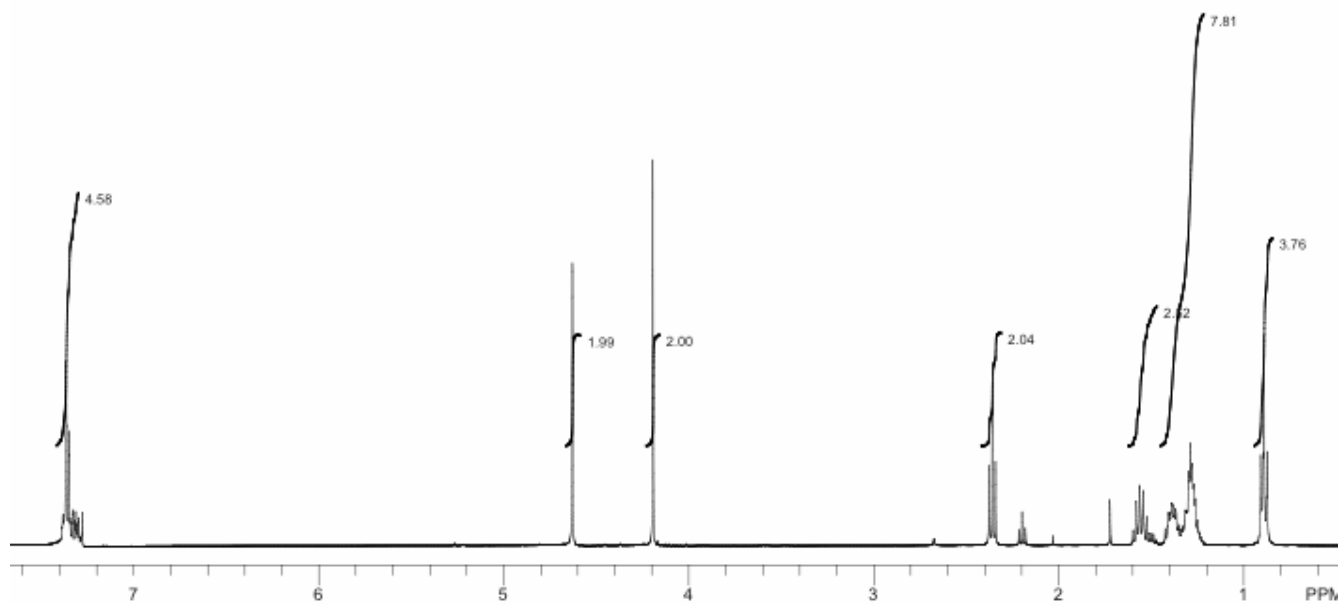

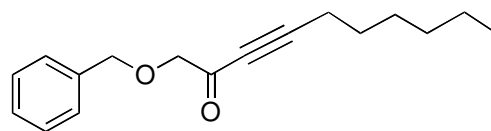

**3j**

$^{13}\text{C}$  NMR,  $\text{CDCl}_3$ , 100MHz

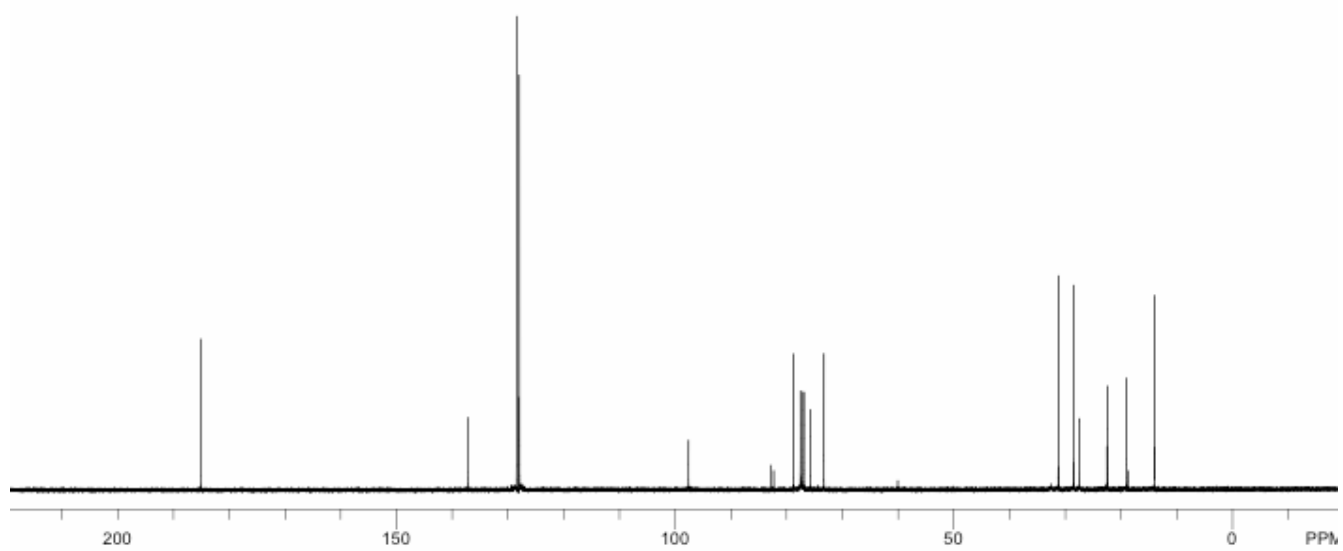

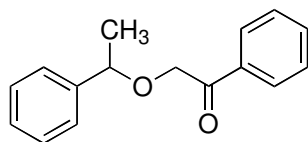

**14a**

$^1\text{H}$  NMR,  $\text{CDCl}_3$ , 400MHz

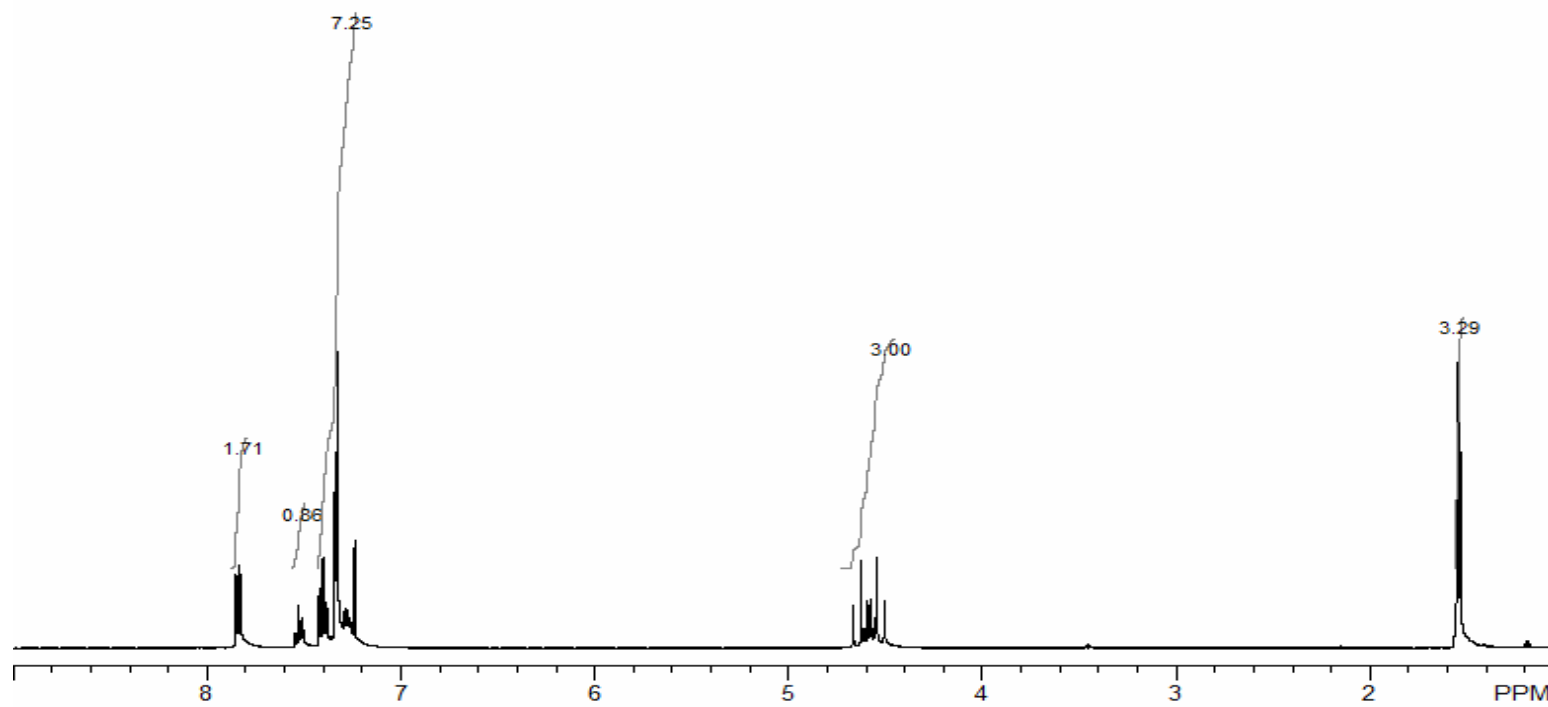



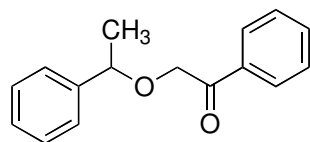

**14a**

$^{13}\text{C}$  NMR,  $\text{CDCl}_3$ , 100MHz

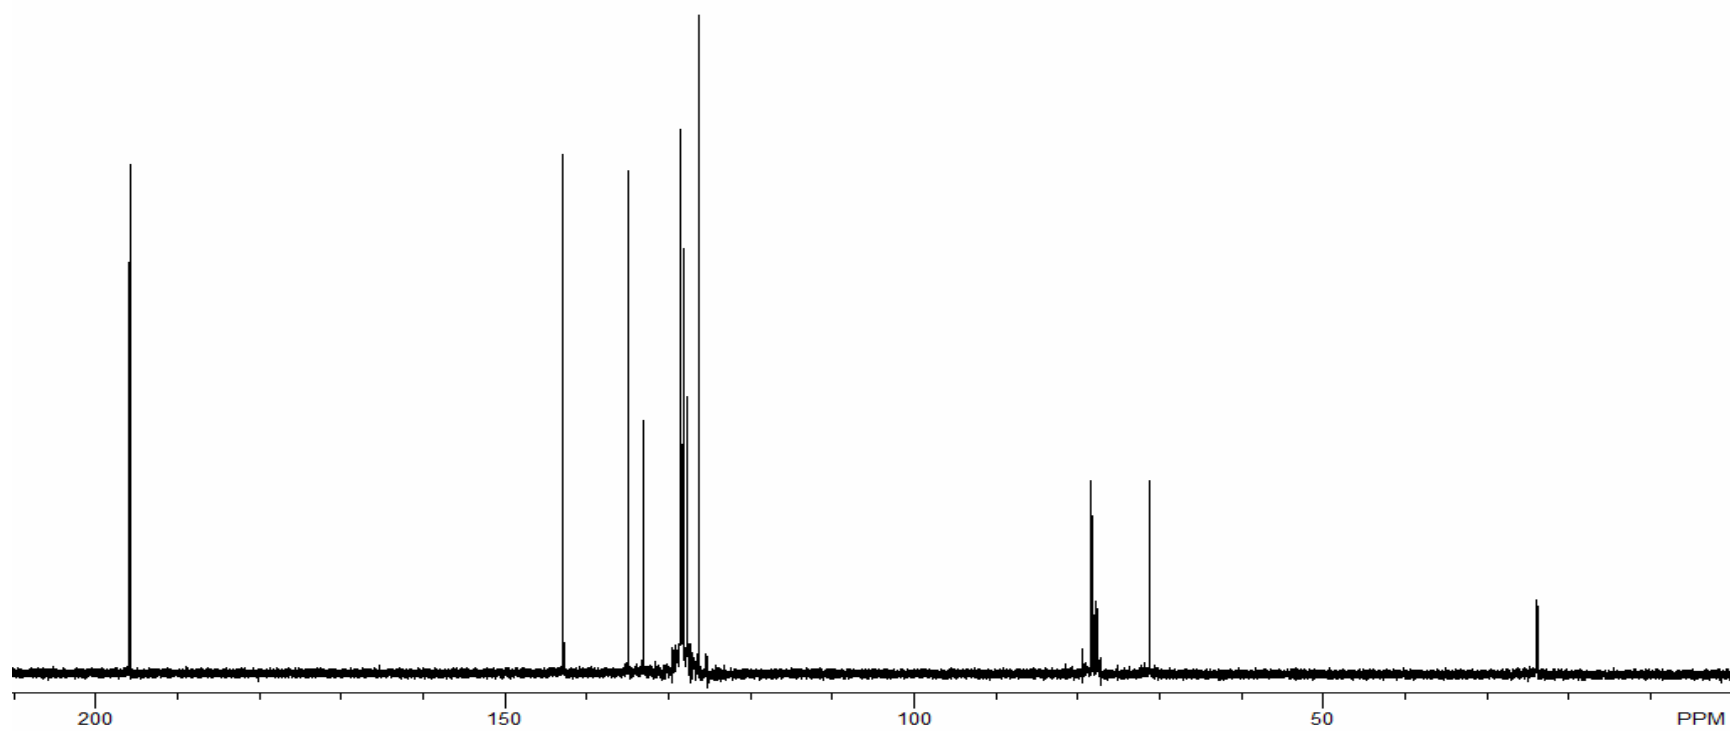

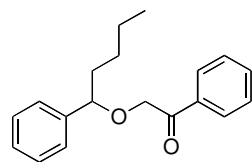

14b

$^1\text{H}$  NMR,  $\text{CDCl}_3$ , 400MHz

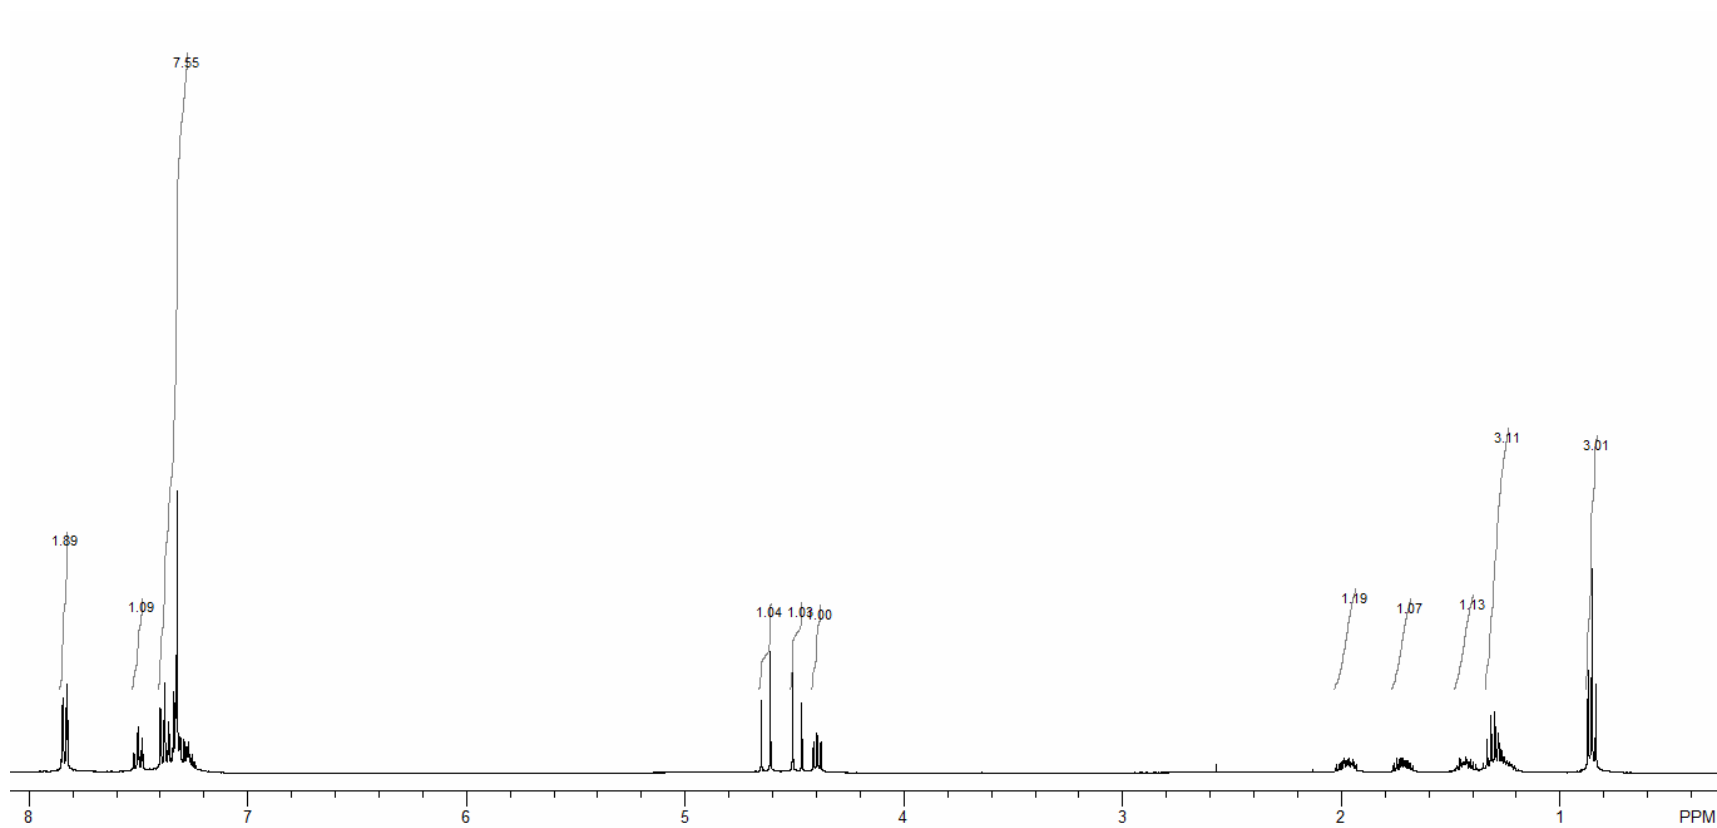

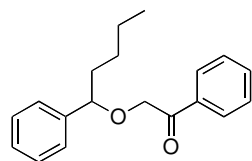

**14b**

$^{13}\text{C}$  NMR,  $\text{CDCl}_3$ , 100MHz

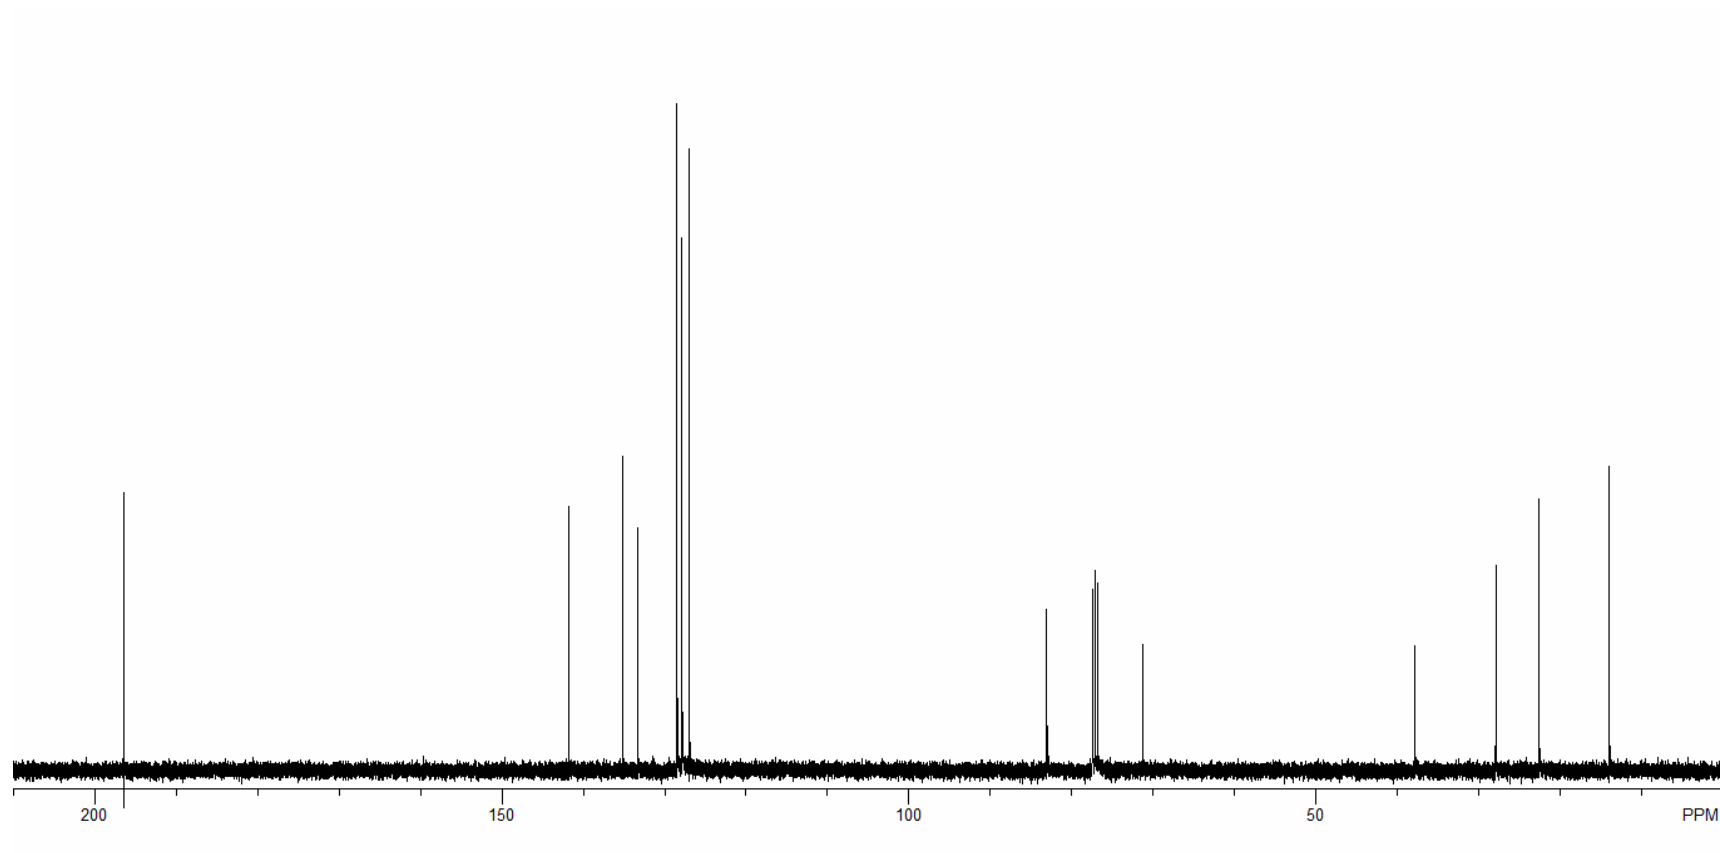

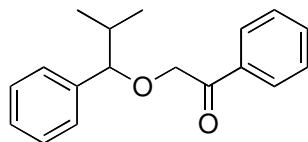

**14c**

$^1\text{H}$  NMR,  $\text{CDCl}_3$ , 400MHz

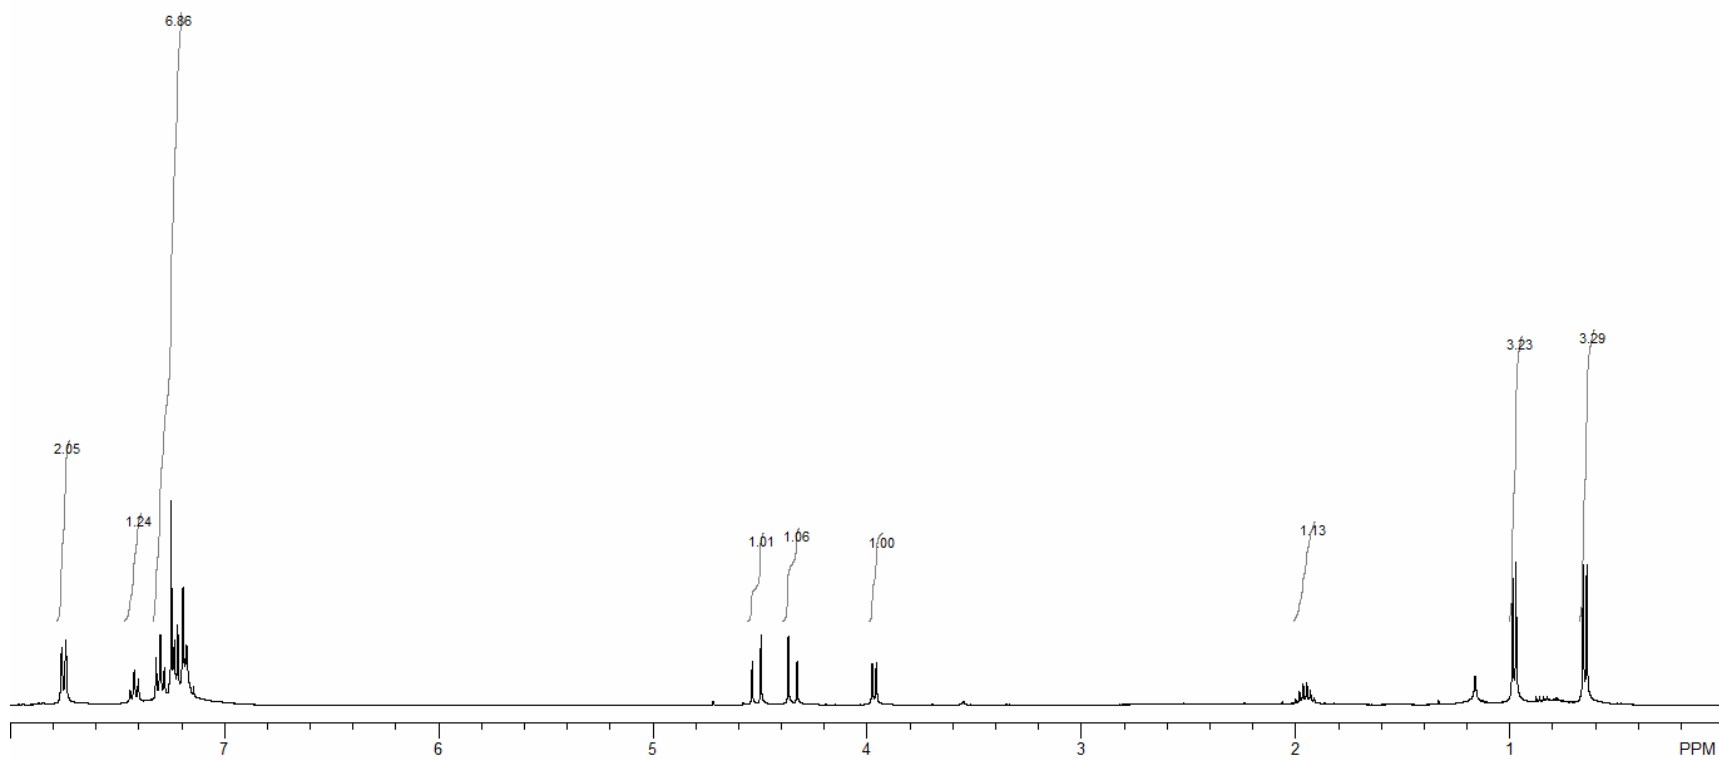

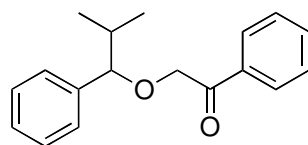

**14c**

$^{13}\text{C}$  NMR,  $\text{CDCl}_3$ , 100MHz

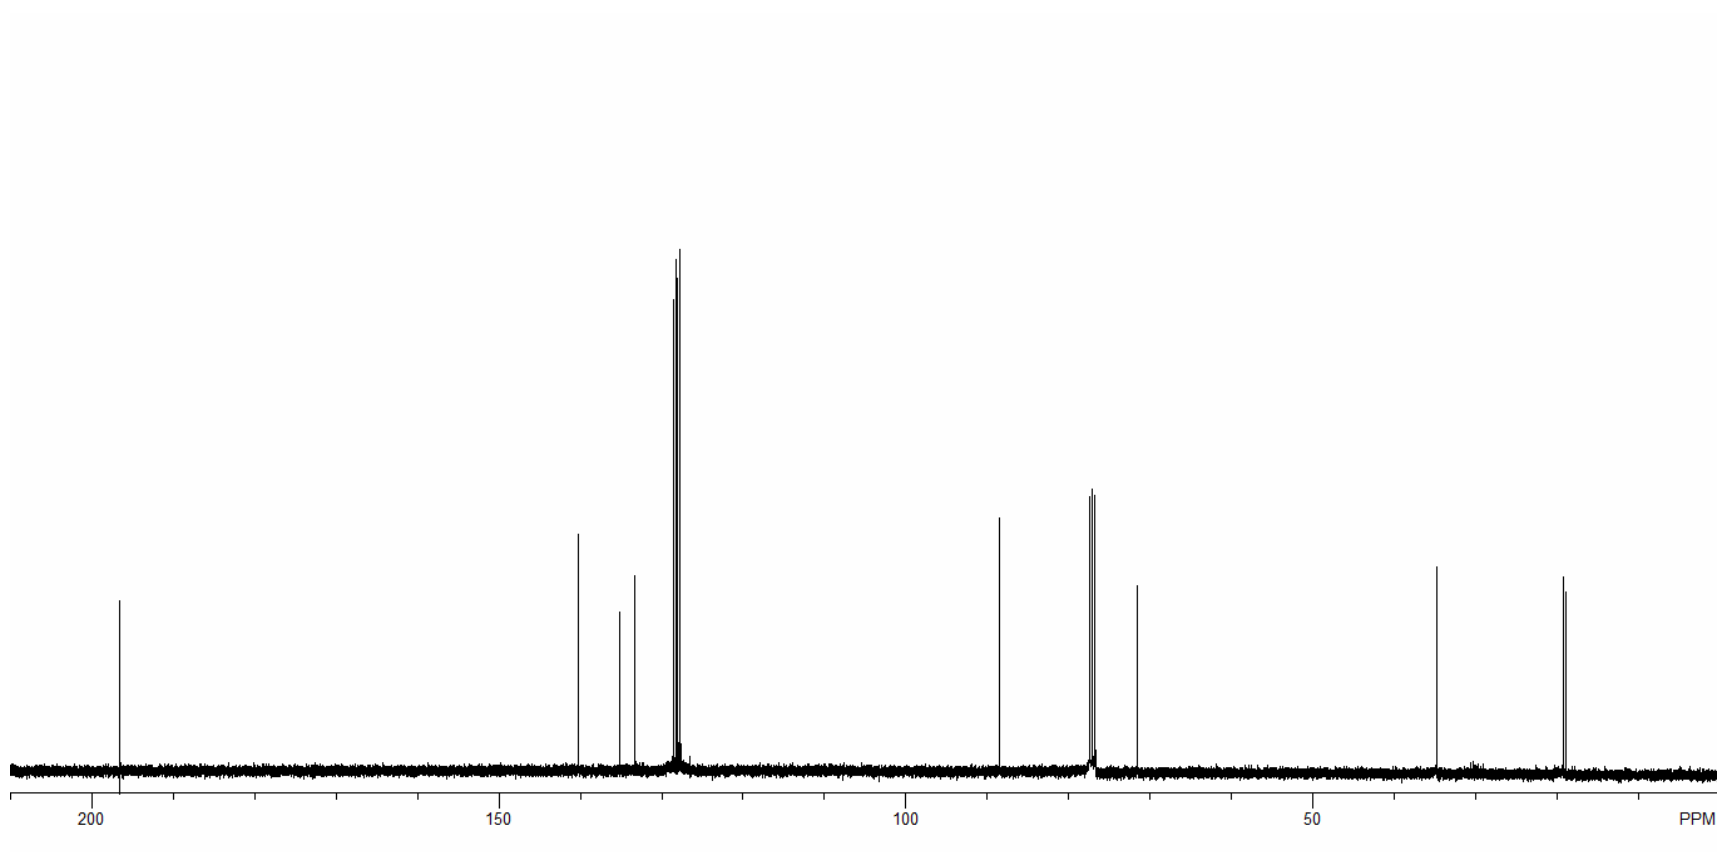

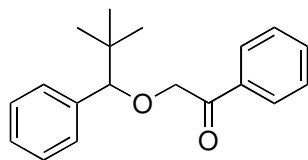

**14d**

$^1\text{H}$  NMR,  $\text{CDCl}_3$ , 400MHz

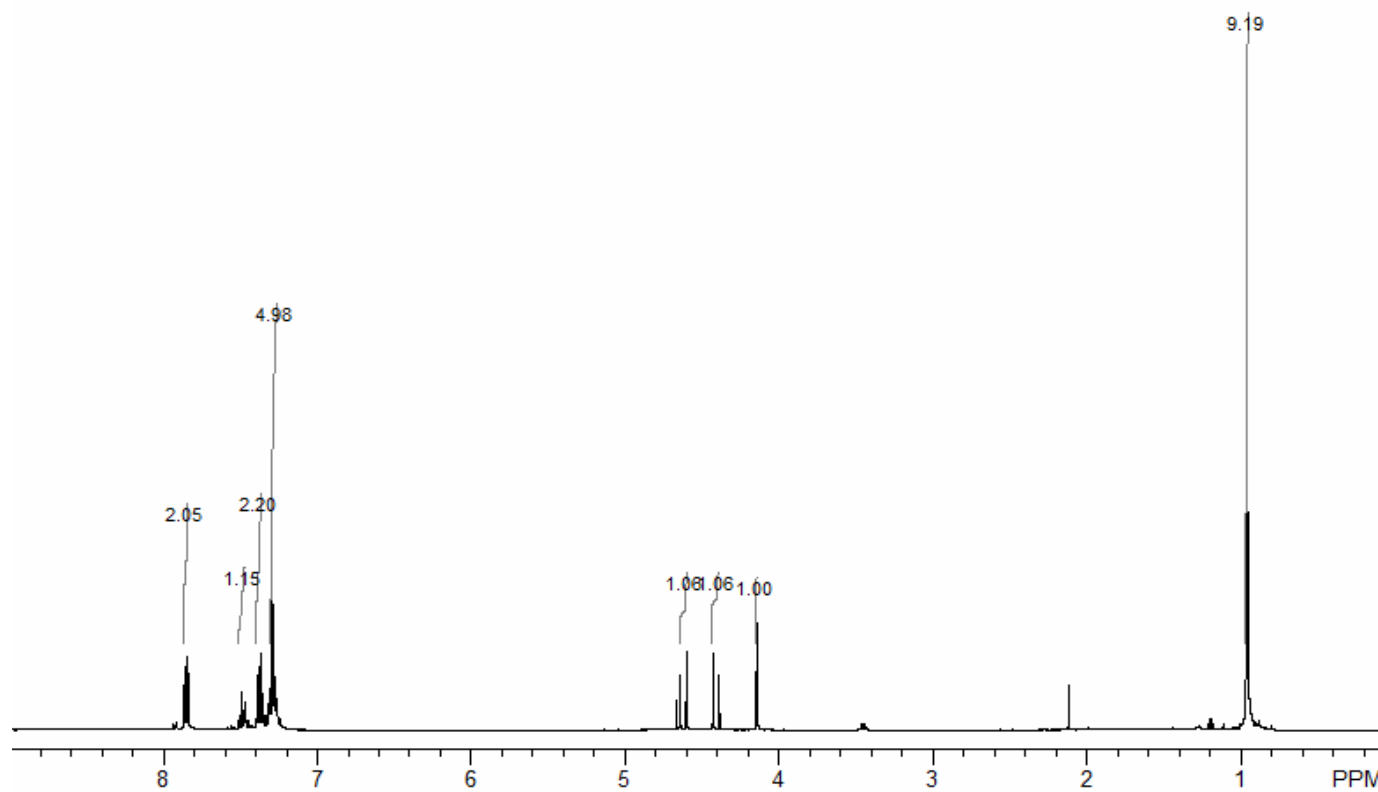

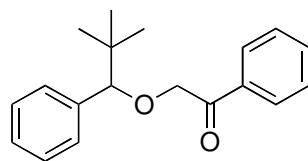

**14d**

$^{13}\text{C}$  NMR,  $\text{CDCl}_3$ , 100MHz

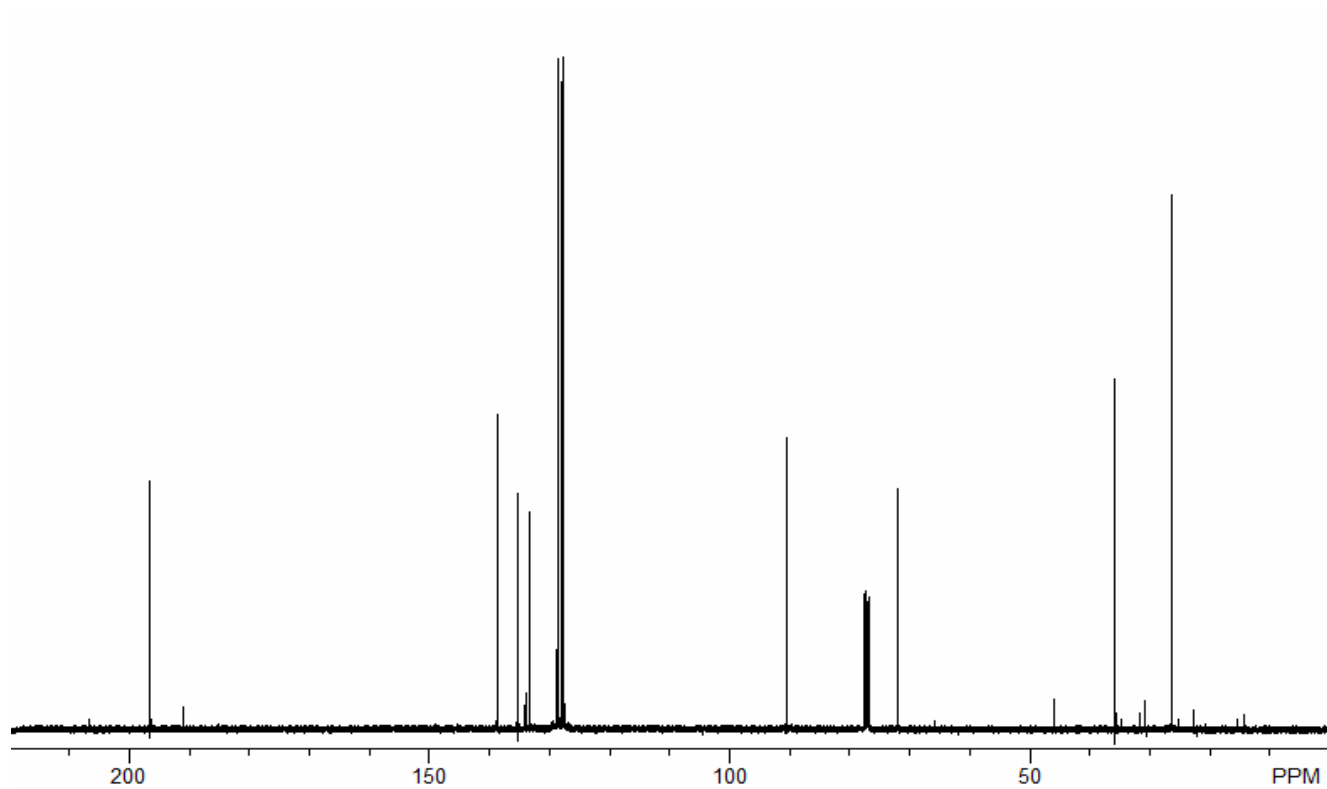

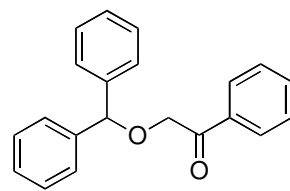

**14e**

$^1\text{H}$  NMR,  $\text{CDCl}_3$ , 400MHz

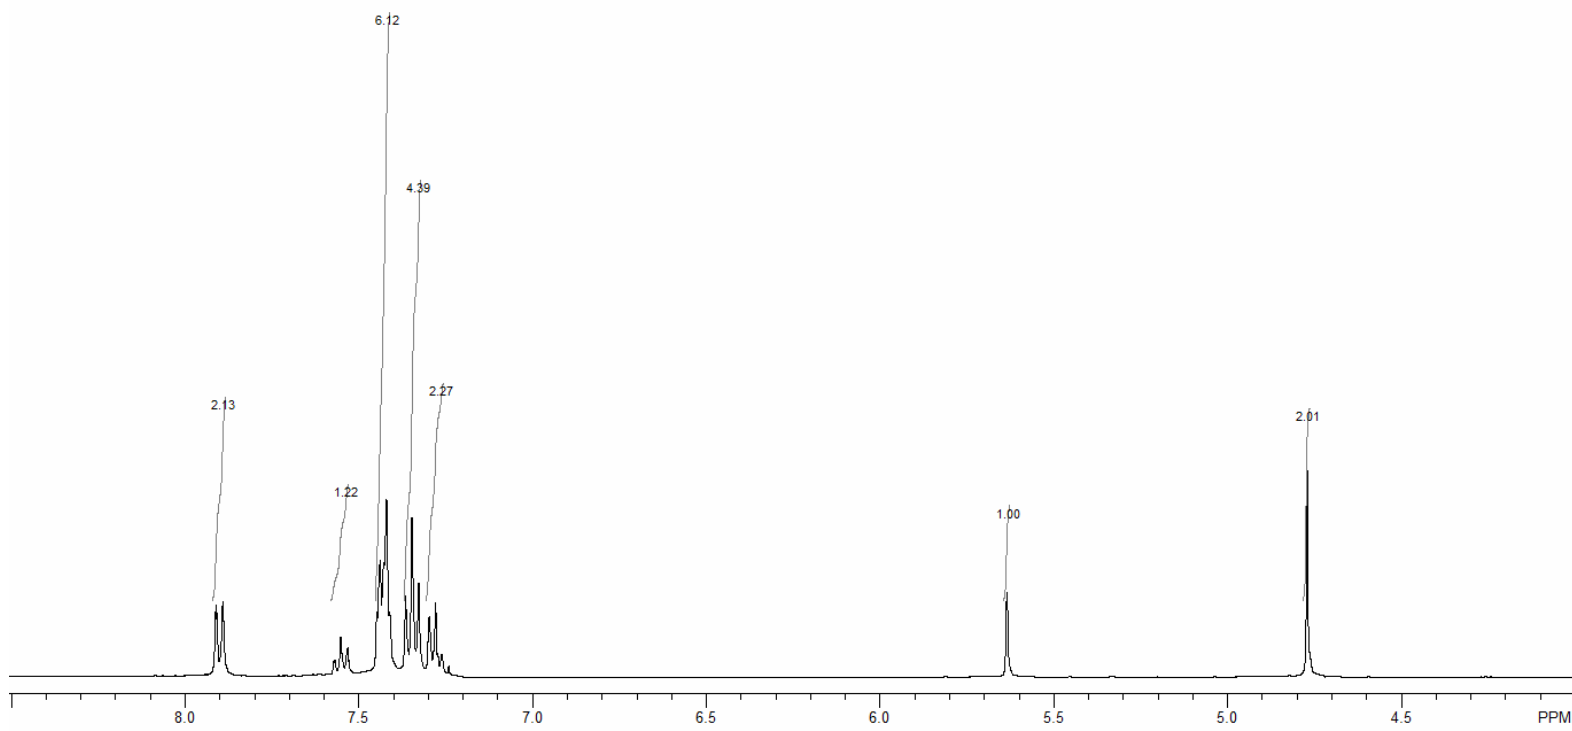



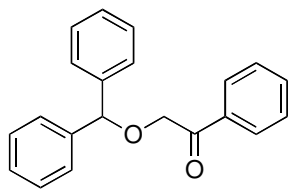

**14e**

$^{13}\text{C}$  NMR,  $\text{CDCl}_3$ , 100MHz

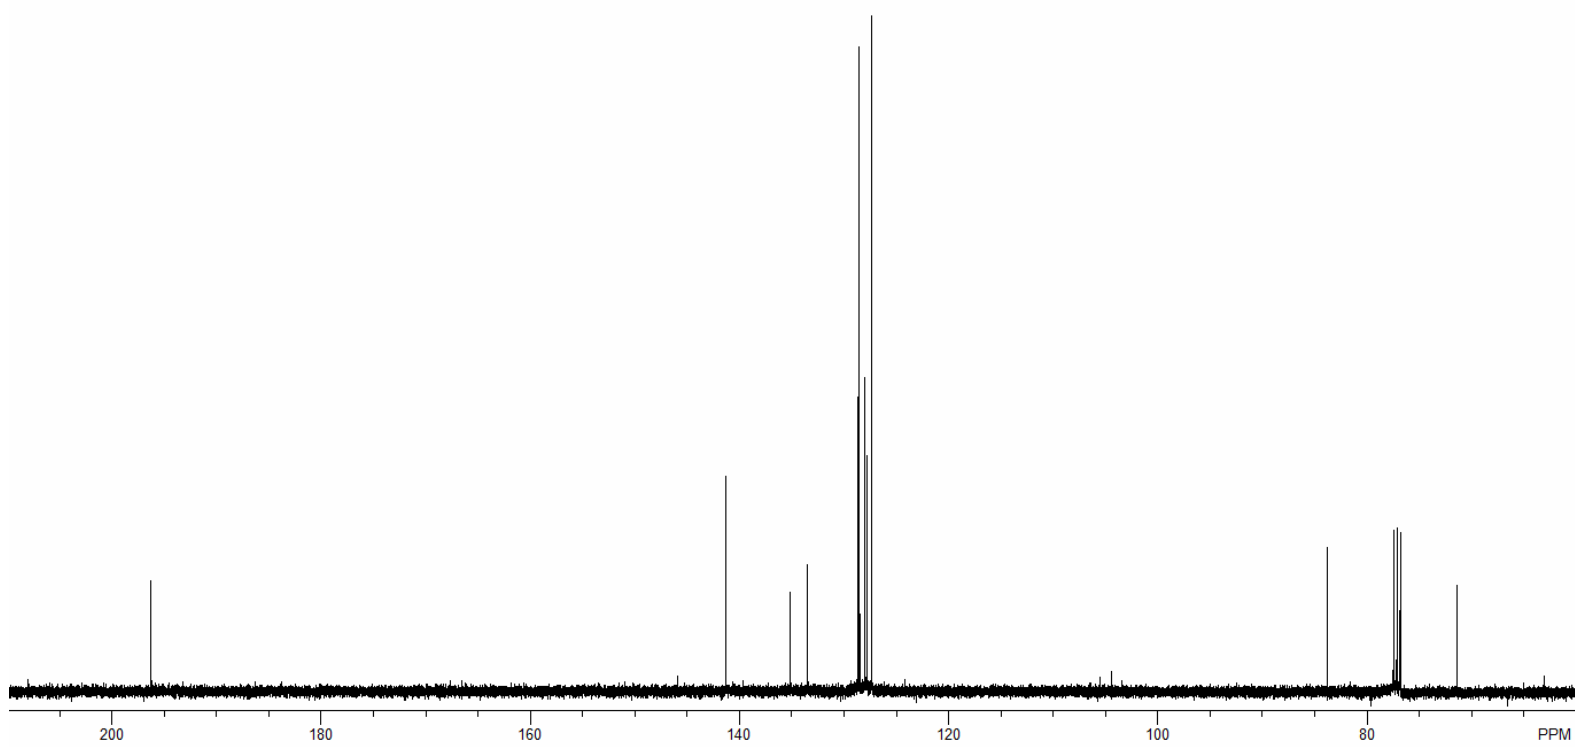

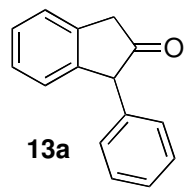

$^1\text{H}$  NMR,  $\text{CDCl}_3$ , 400MHz

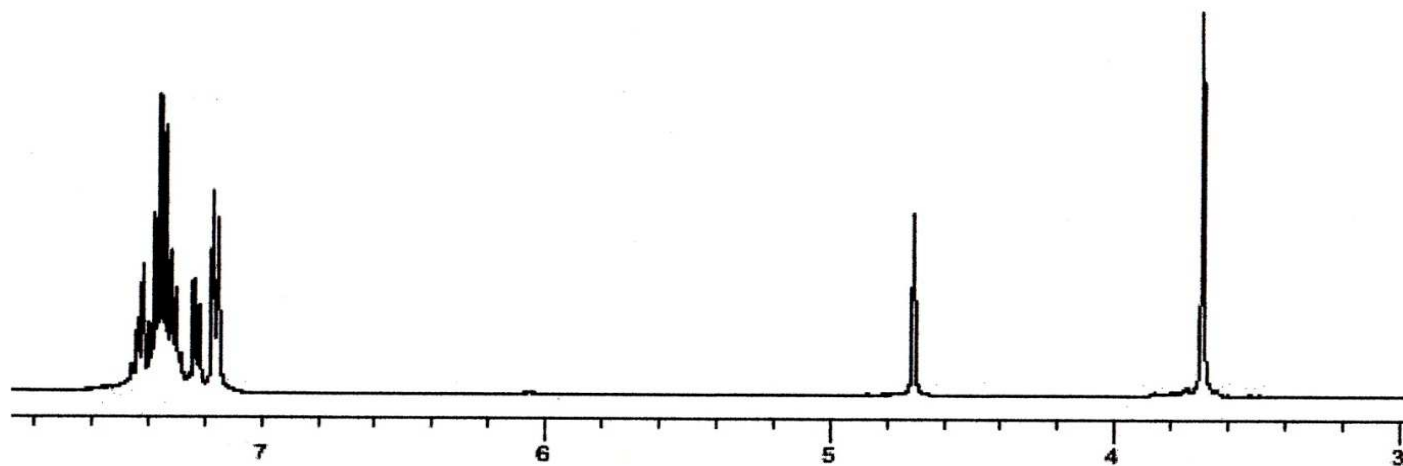

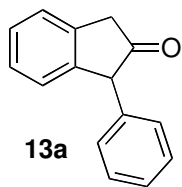

$^{13}\text{C}$  NMR,  $\text{CDCl}_3$ , 100MHz

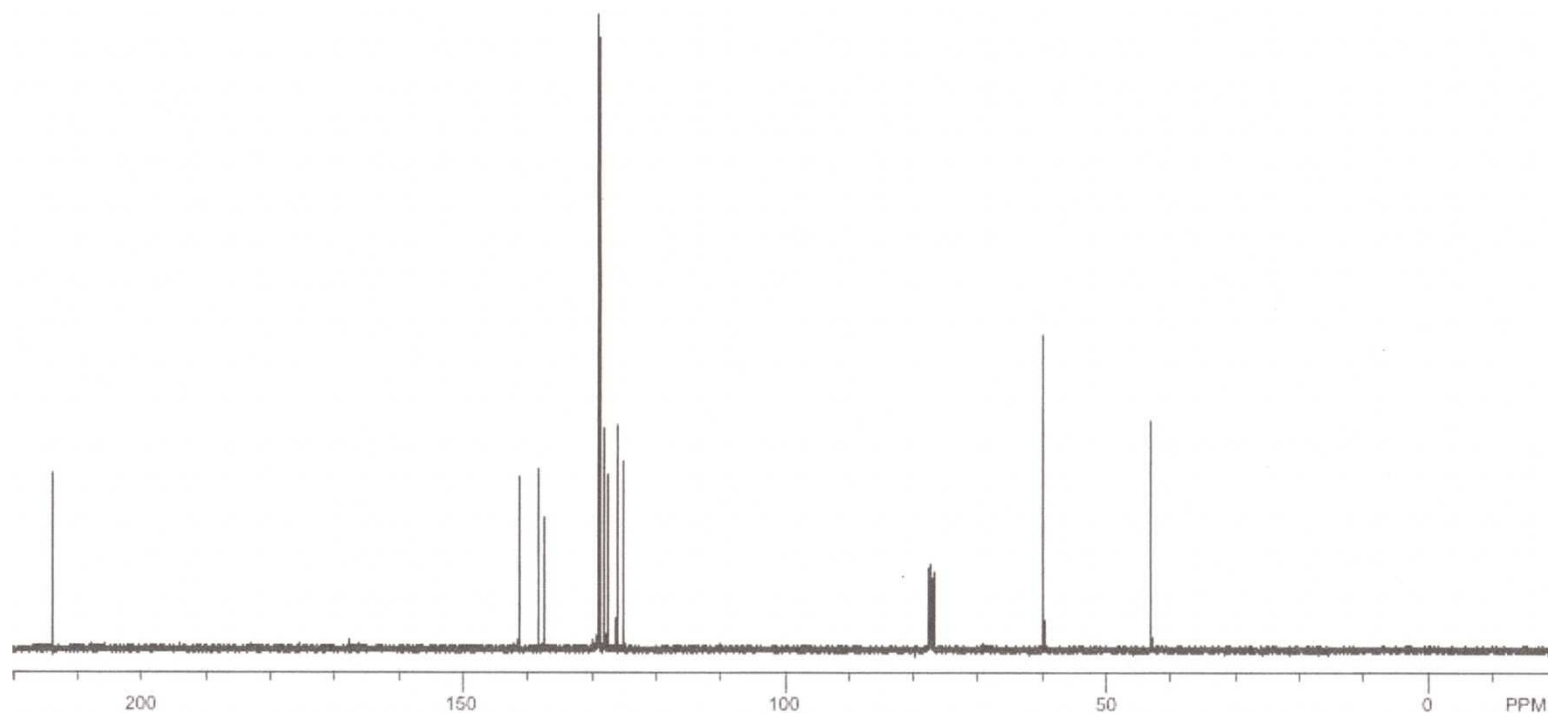

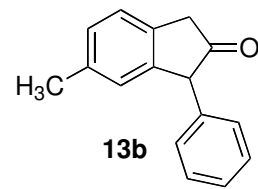

$^1\text{H NMR}$ ,  $\text{CDCl}_3$ , 400MHz

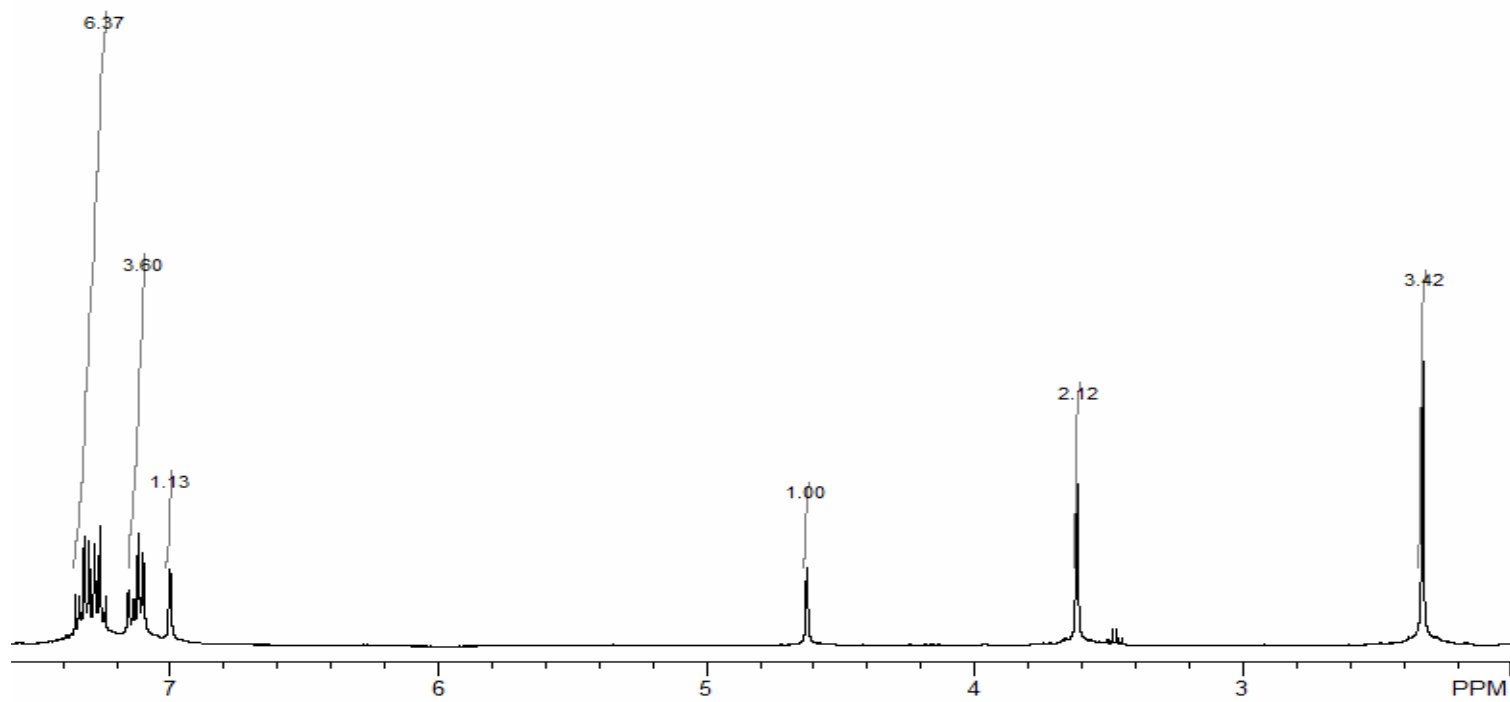

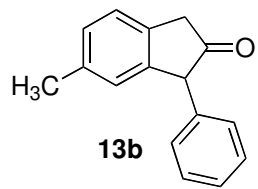

$^{13}\text{C}$  NMR,  $\text{CDCl}_3$ , 100MHz

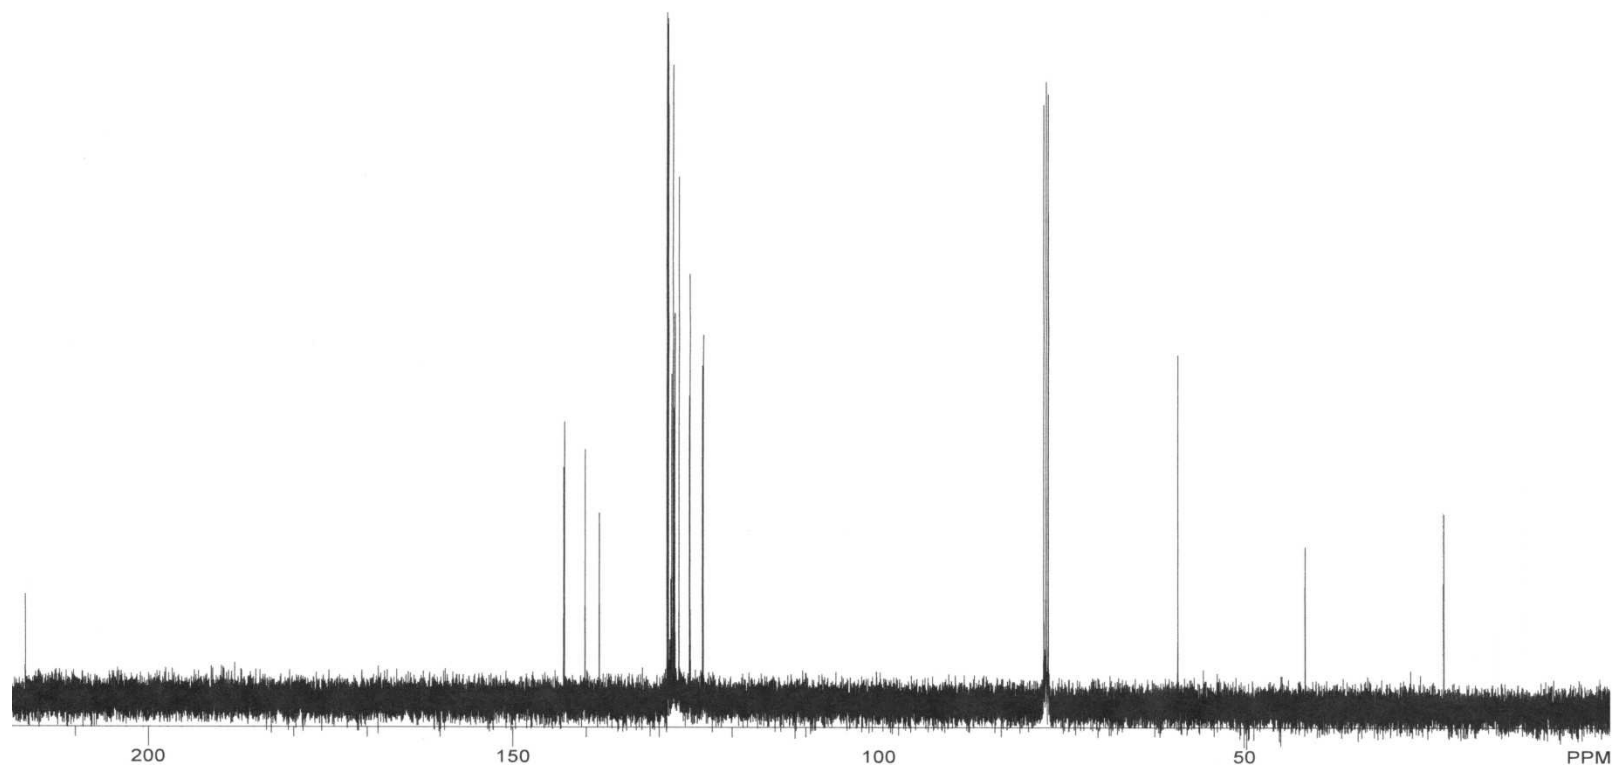

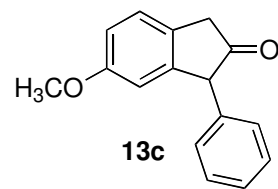

$^1\text{H}$  NMR,  $\text{CDCl}_3$ , 400MHz

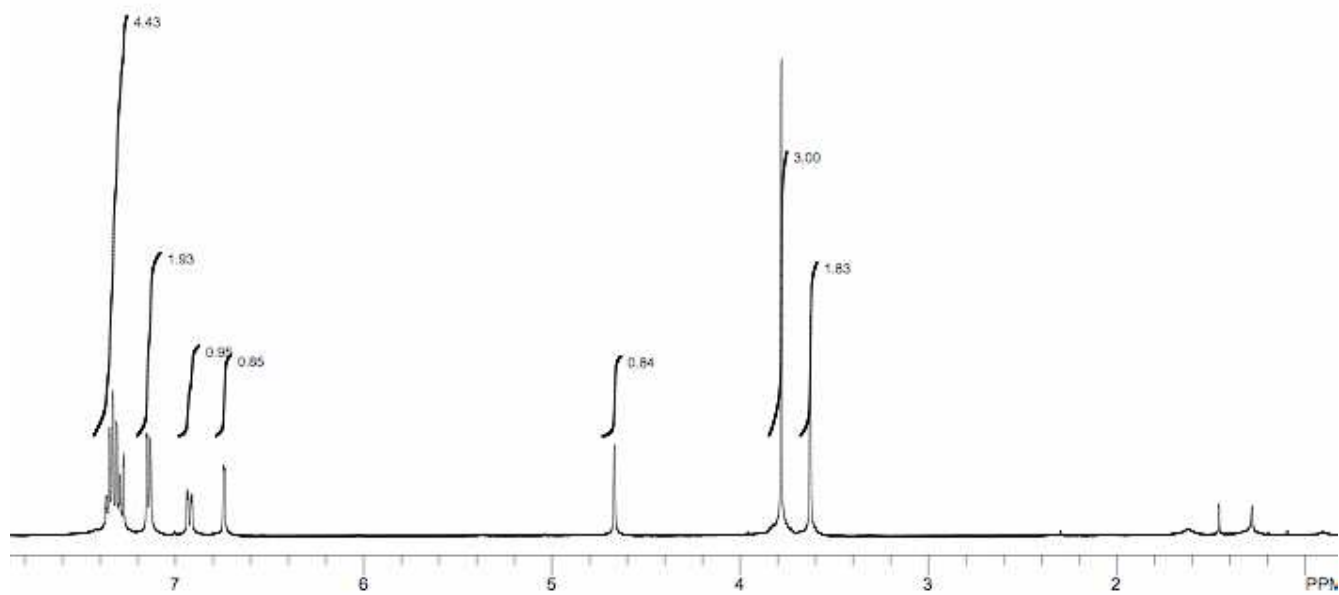

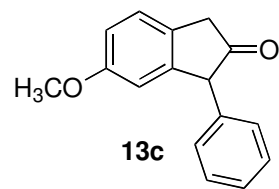

$^{13}\text{C}$  NMR,  $\text{CDCl}_3$ , 100MHz

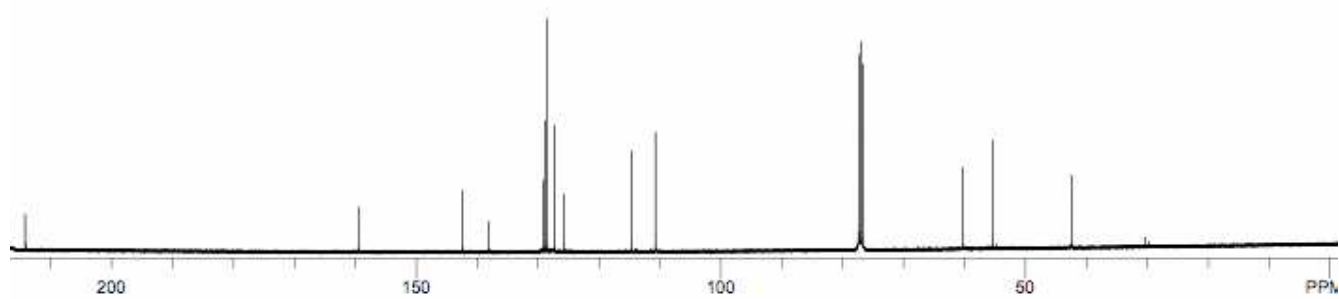

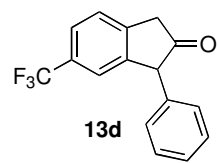

$^1\text{H}$  NMR,  $\text{CDCl}_3$ , 400MHz

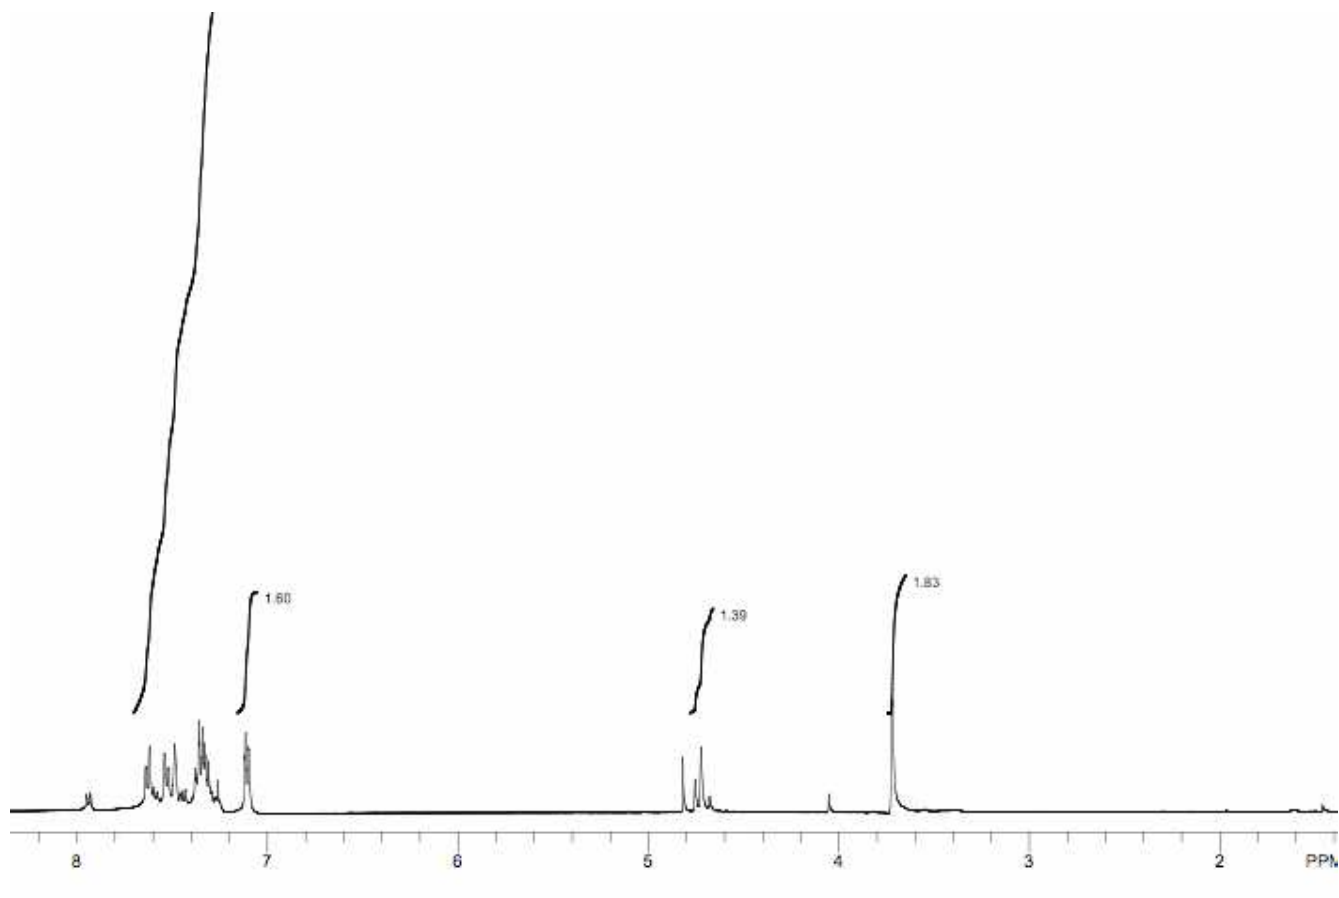



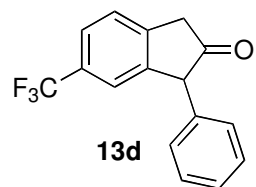

$^{13}\text{C}$  NMR,  $\text{CDCl}_3$ , 100MHz

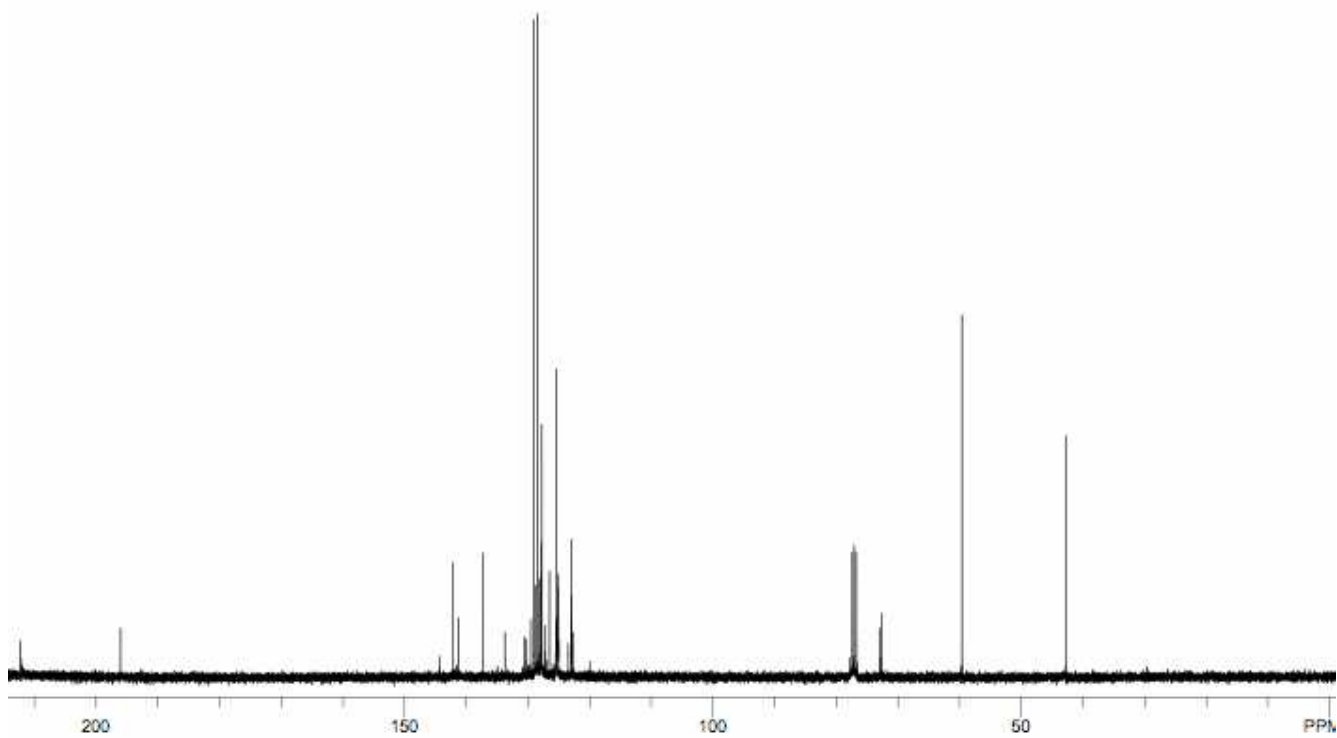

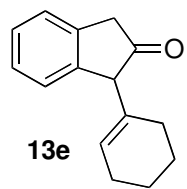

$^1\text{H}$  NMR,  $\text{CDCl}_3$ , 400MHz

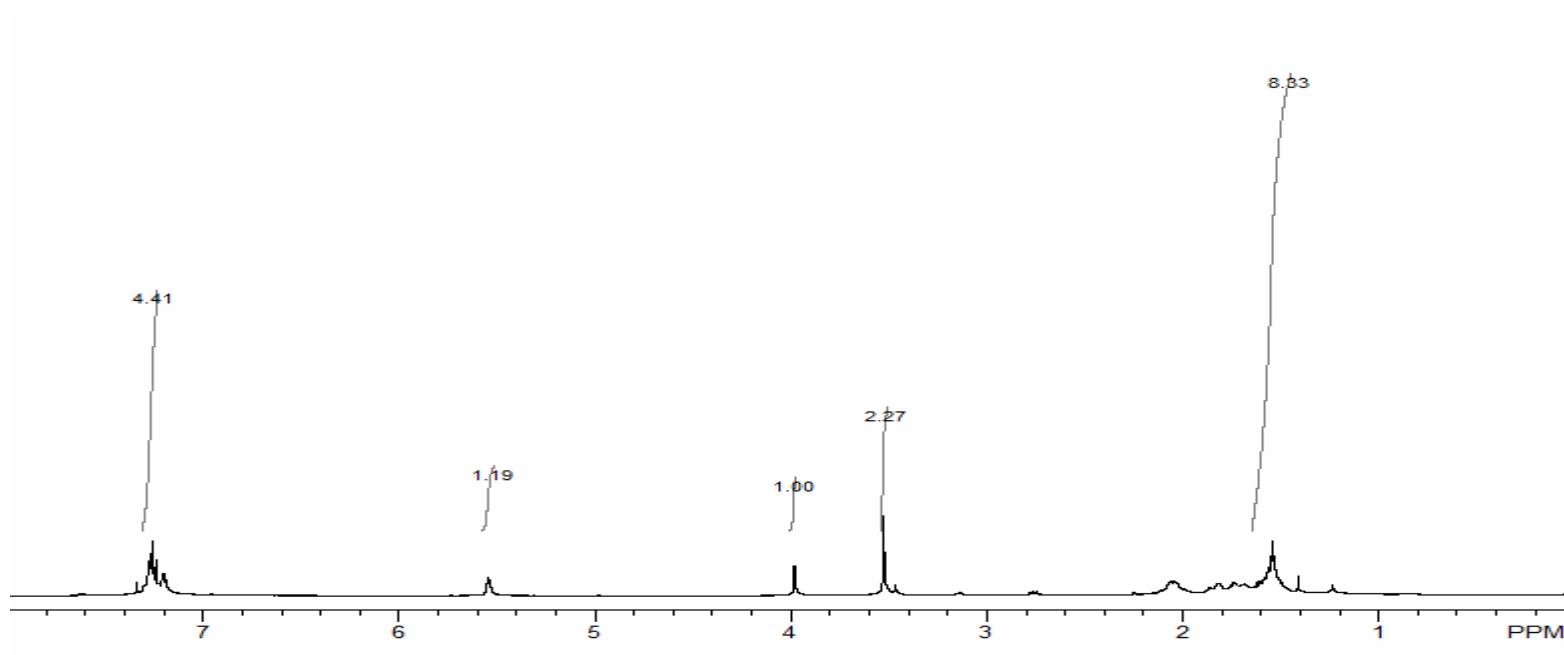

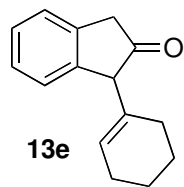

$^{13}\text{C}$  NMR,  $\text{CDCl}_3$ , 100MHz

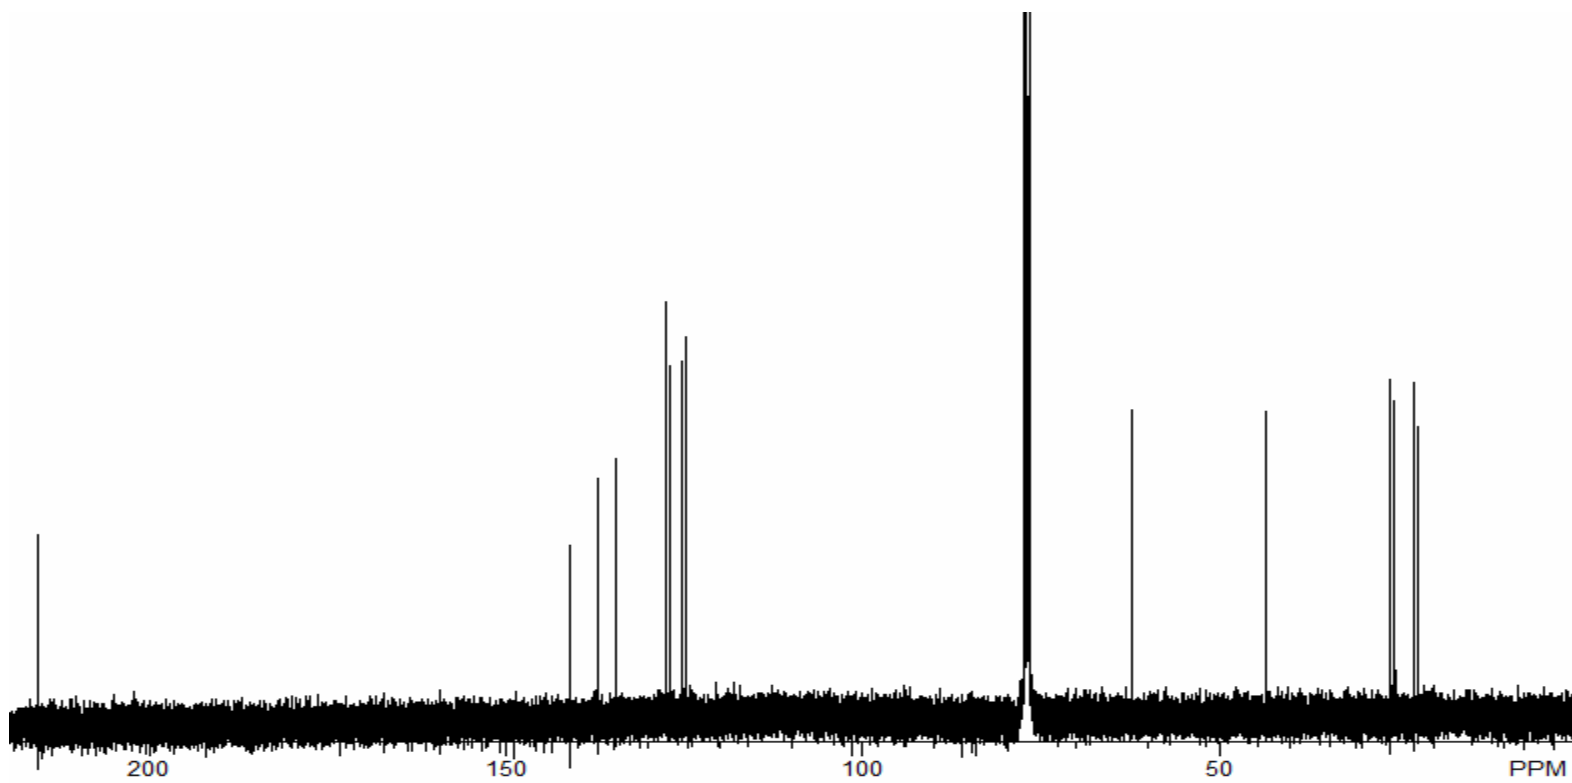

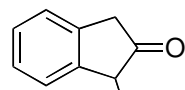

**13f**

CH<sub>3</sub> <sup>1</sup>H NMR, CDCl<sub>3</sub>, 400MHz

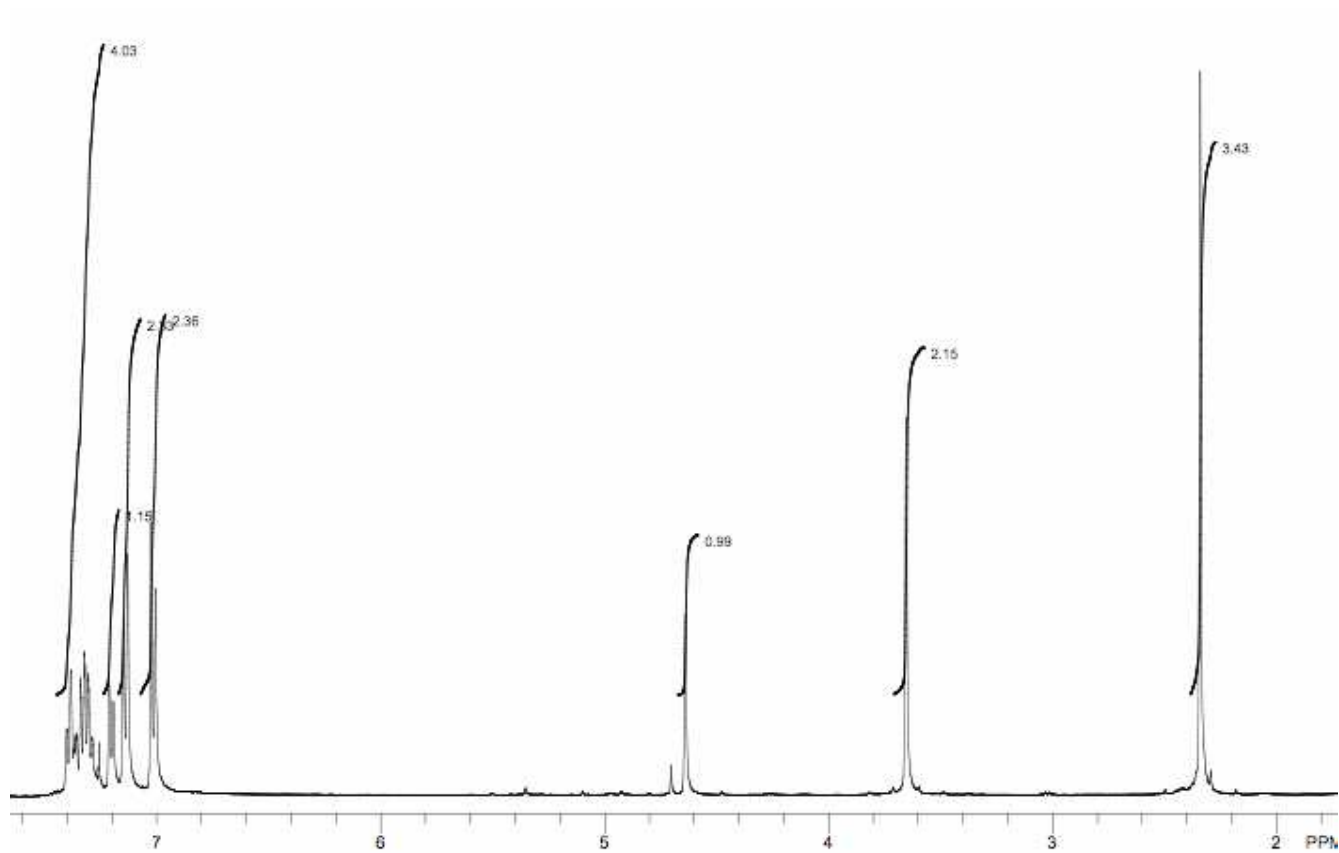

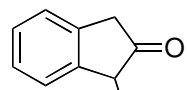

**13f**

CH<sub>3</sub> <sup>13</sup>C NMR, CDCl<sub>3</sub>, 100MHz

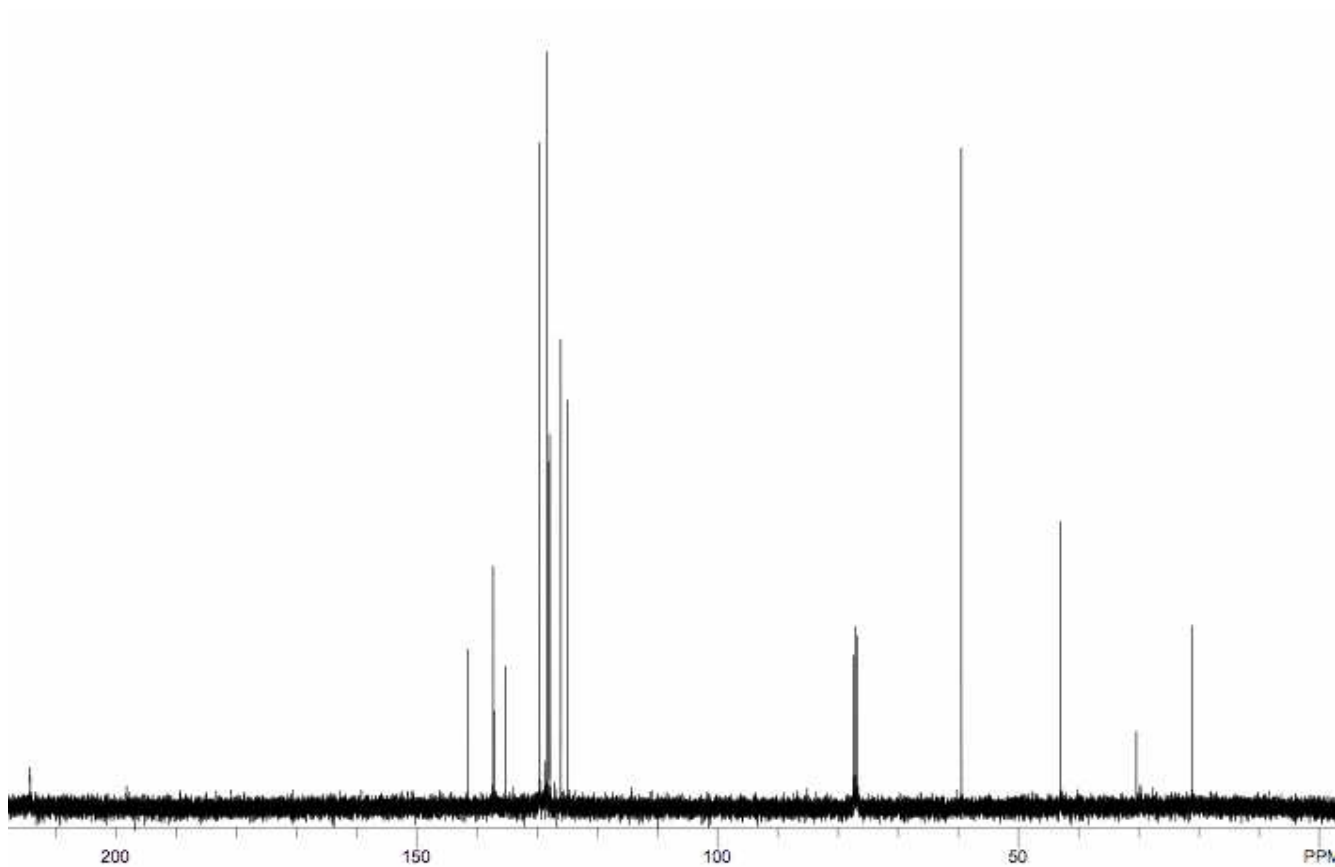

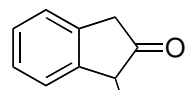

**13g**

OMe  $^1\text{H}$  NMR,  $\text{CDCl}_3$ , 400MHz

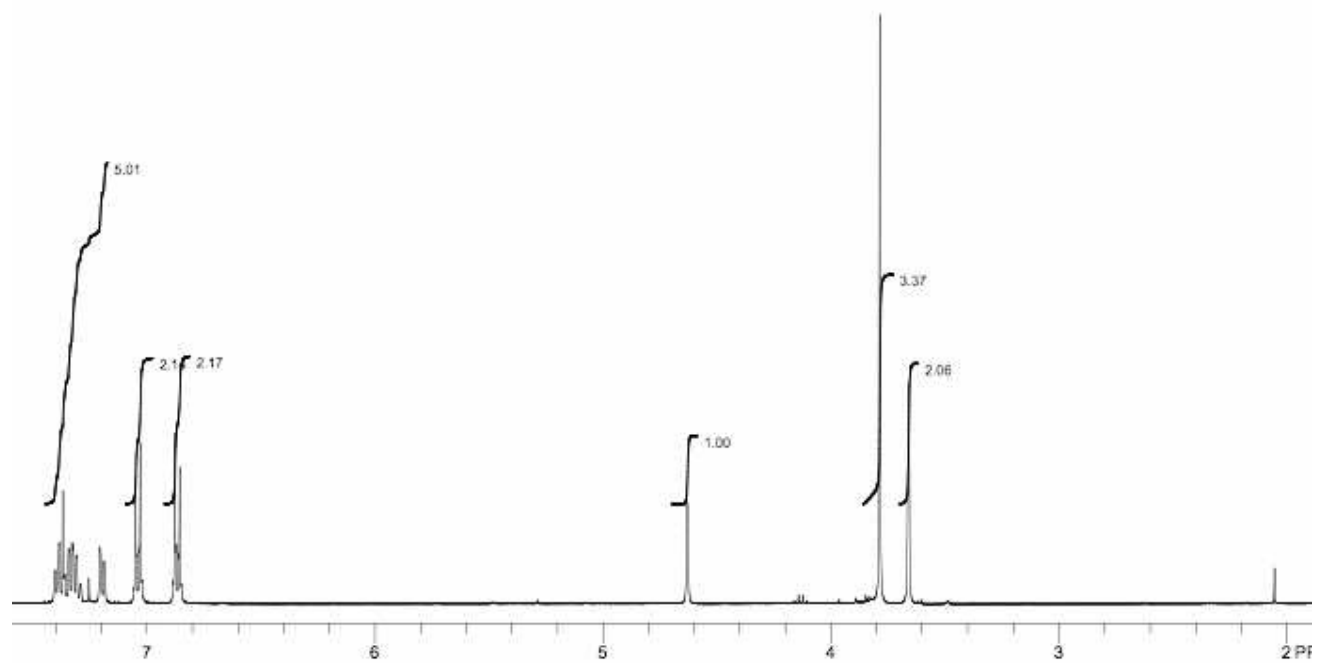

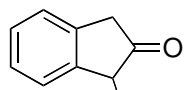

**13g**

OMe  $^{13}\text{C}$  NMR,  $\text{CDCl}_3$ , 100MHz

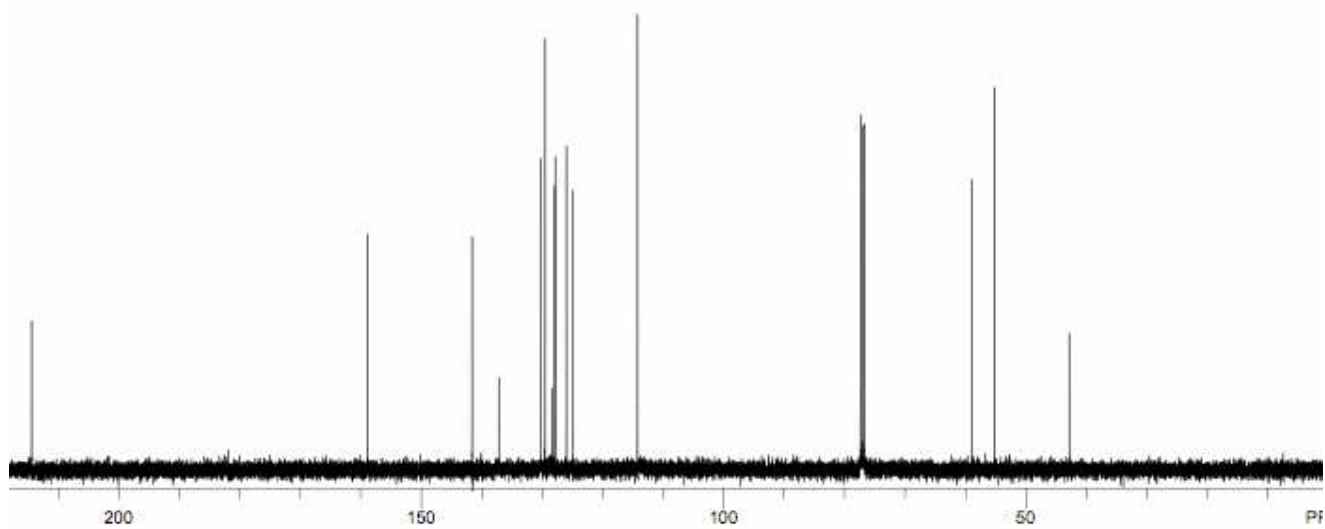

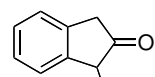

13h

<sup>1</sup>H NMR, CDCl<sub>3</sub>, 400MHz

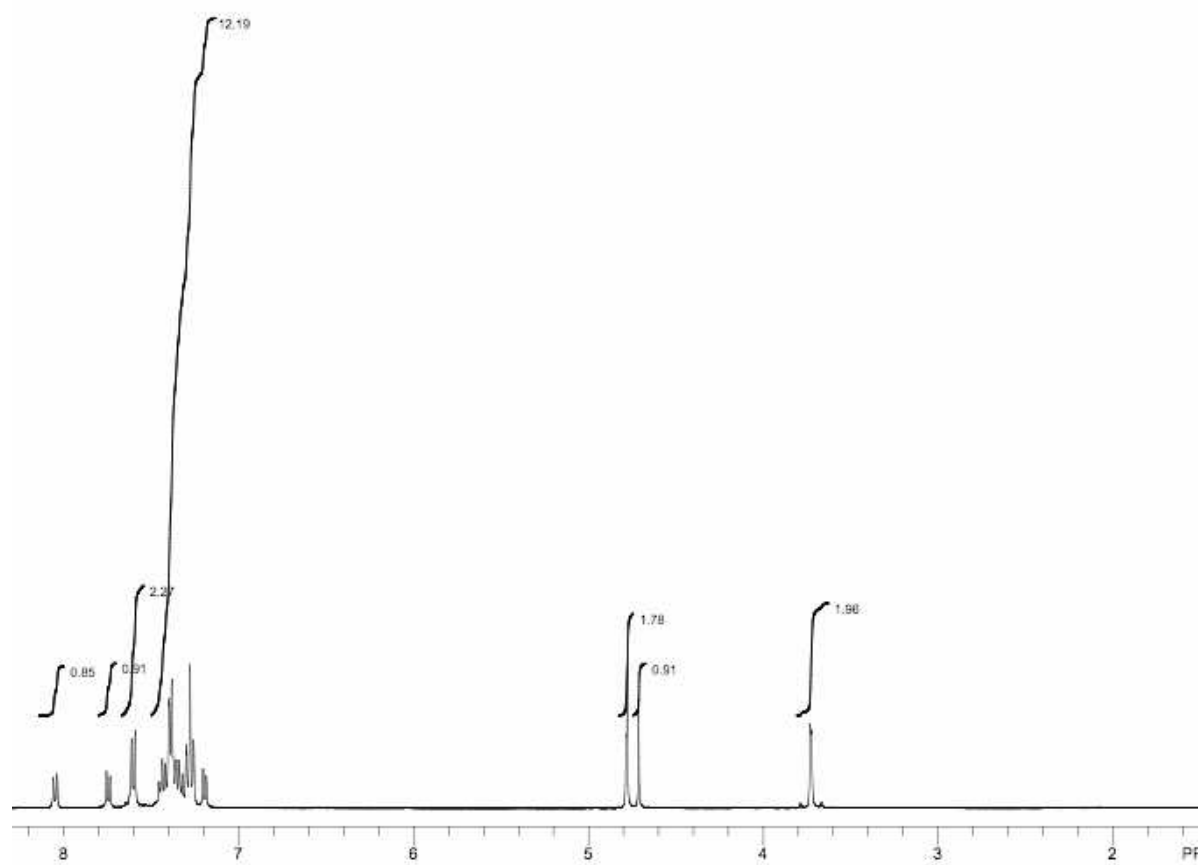



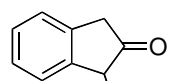

**13h**

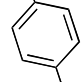

$^{13}\text{C}$  NMR, 1:3  $\text{CDCl}_3/\text{CCl}_4$ , 100MHz

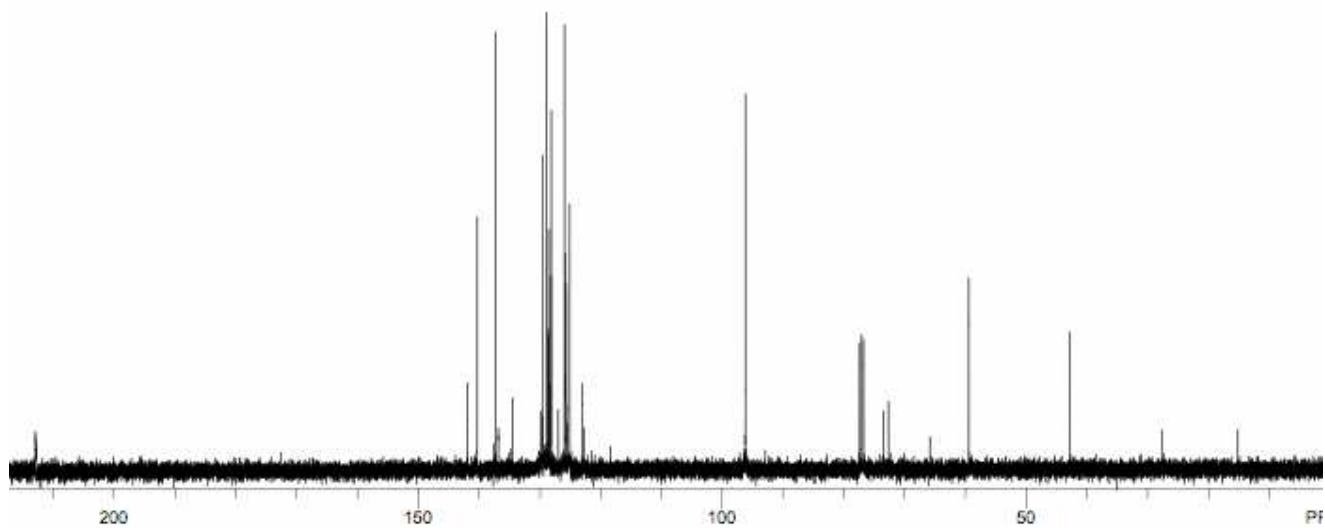

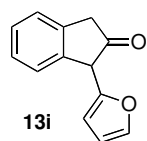

$^1\text{H NMR}$ ,  $\text{CDCl}_3$ , 400MHz

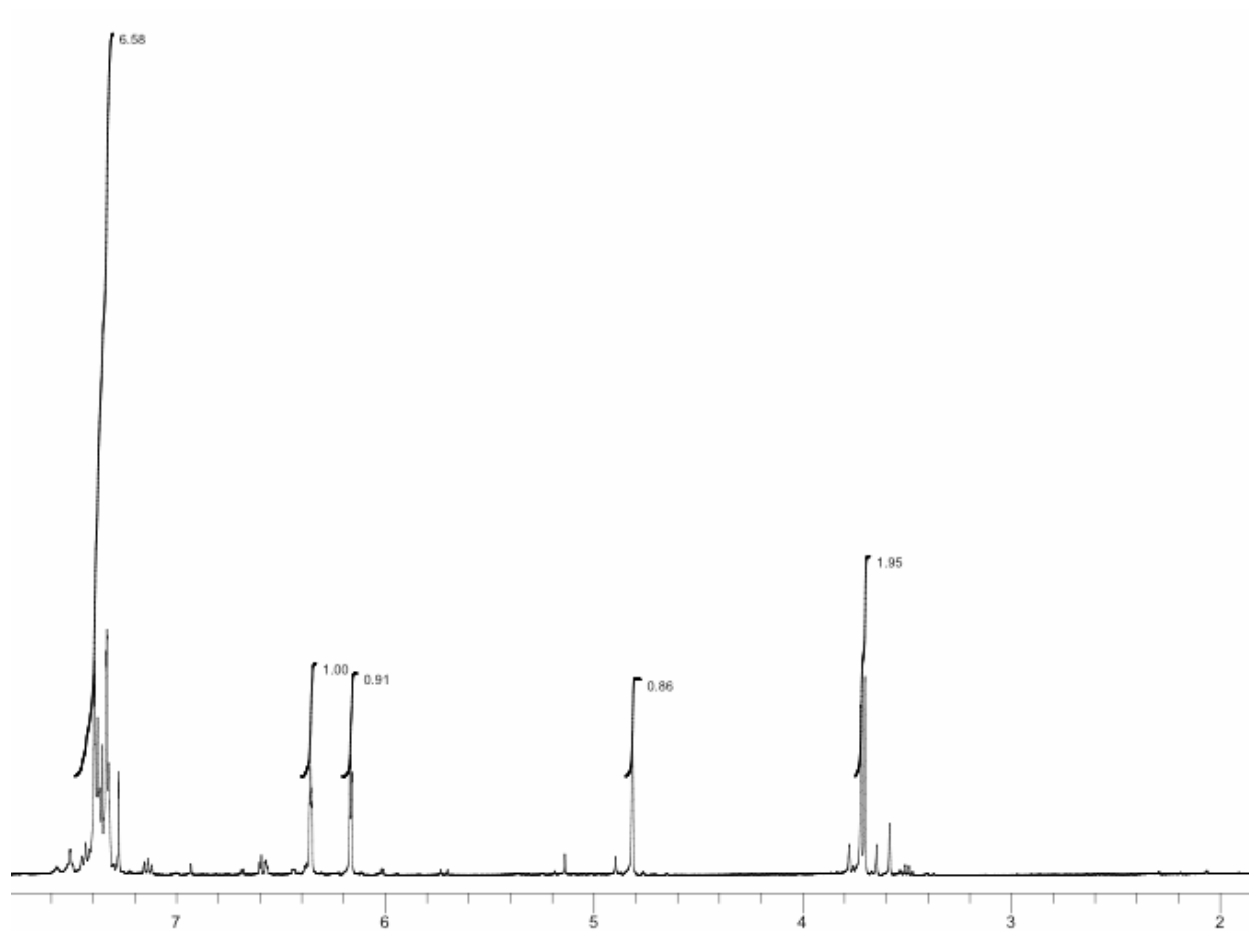

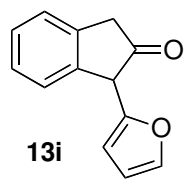

$^{13}\text{C}$  NMR,  $\text{CDCl}_3$ , 100MHz

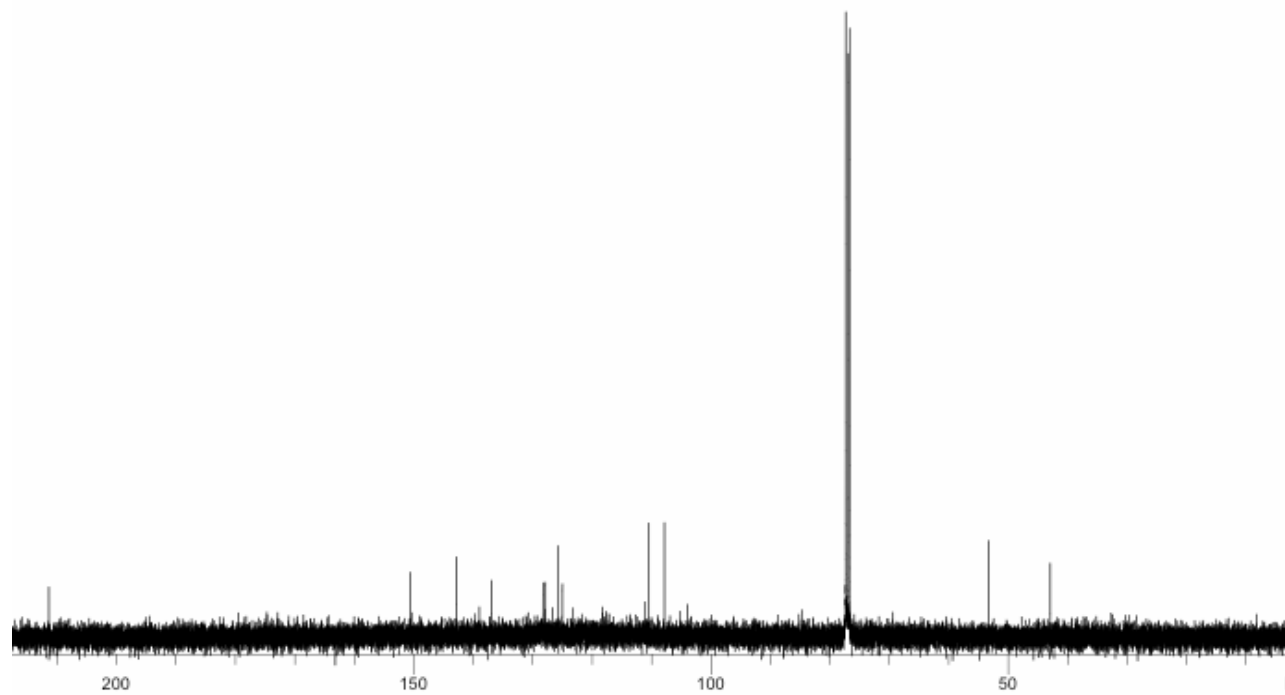

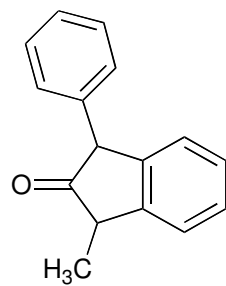

15a

<sup>1</sup>H NMR, CDCl<sub>3</sub>, 400MHz

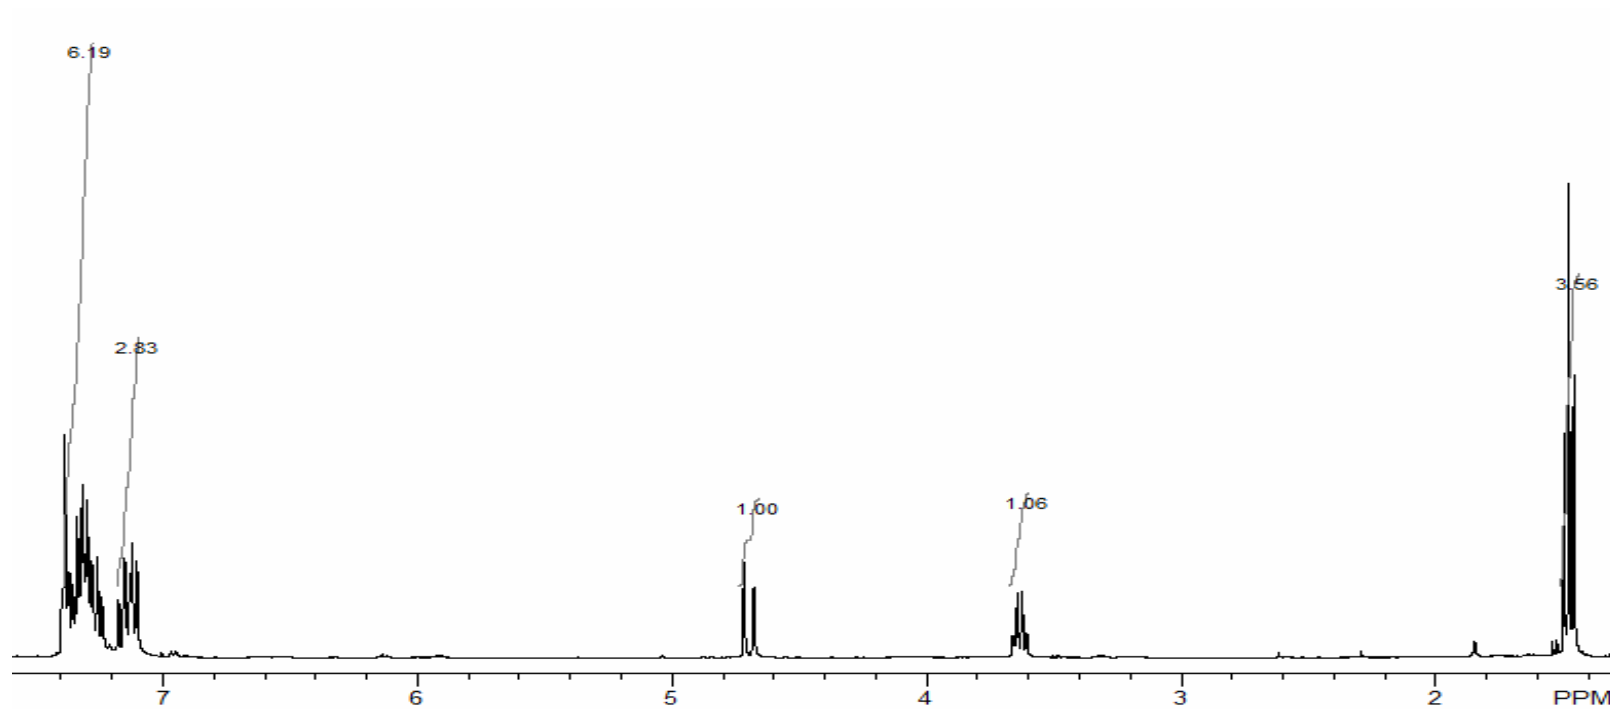

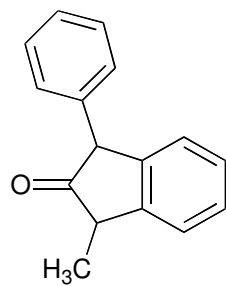

**15a**

$^{13}\text{C}$  NMR,  $\text{CDCl}_3$ , 100MHz

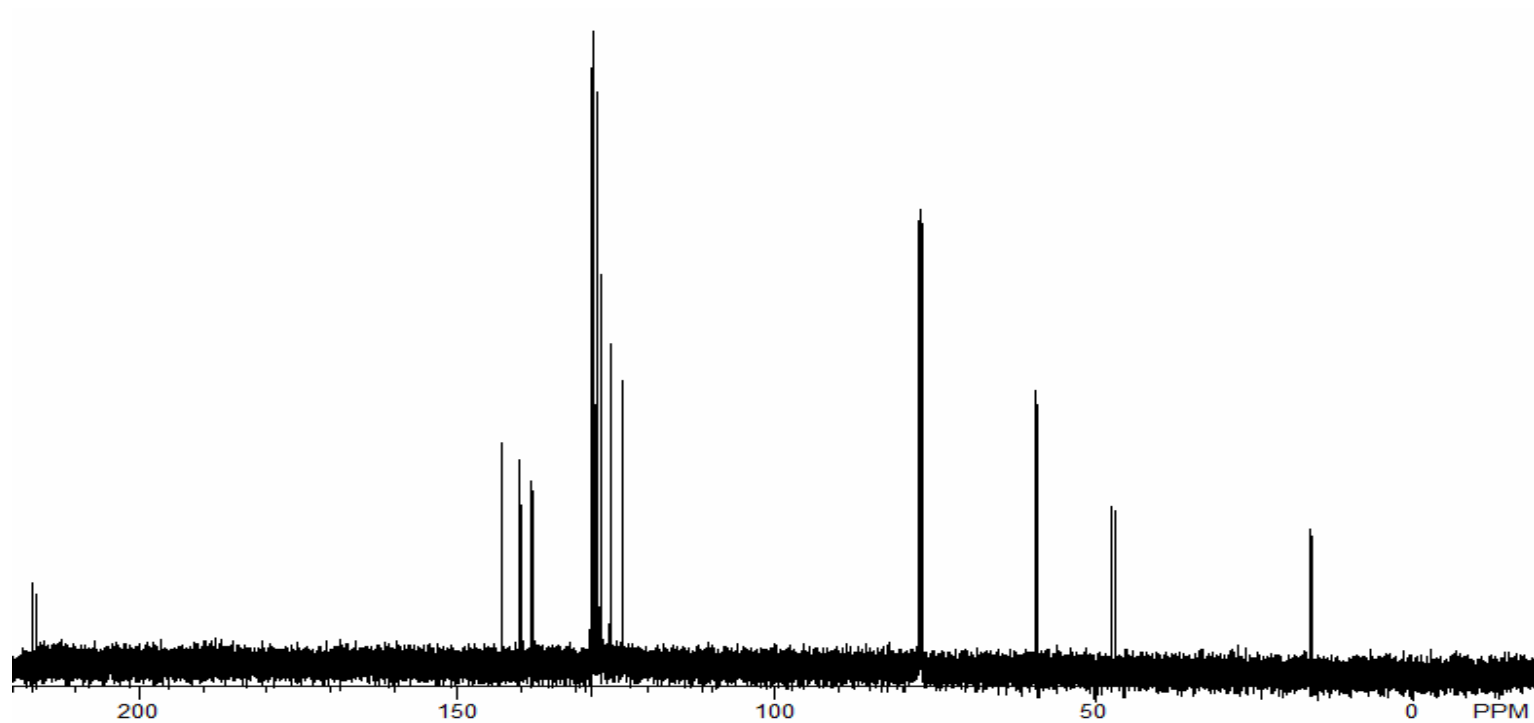

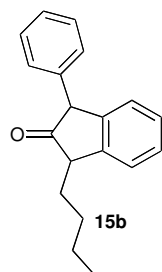

$^1\text{H}$  NMR,  $\text{CDCl}_3$ , 400MHz

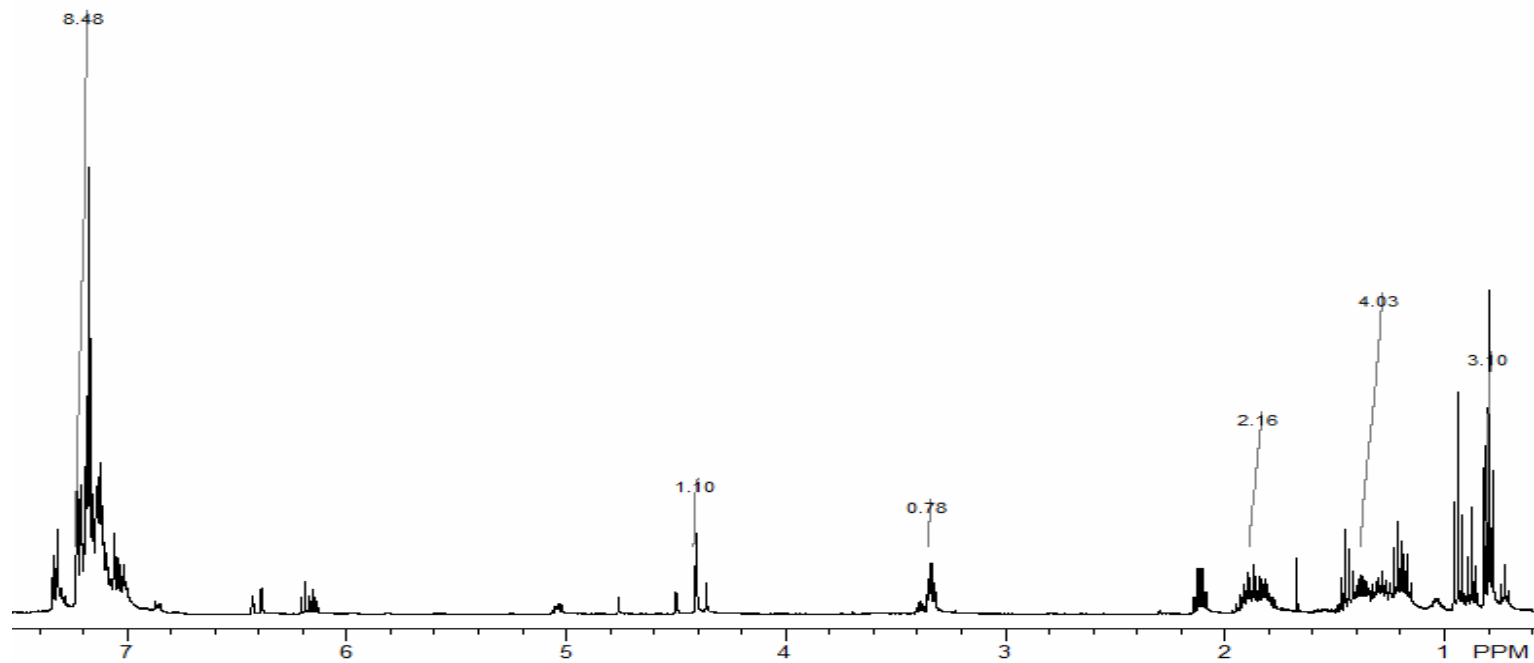

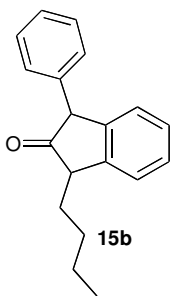

$^{13}\text{C}$  NMR,  $\text{CDCl}_3$ , 100MHz

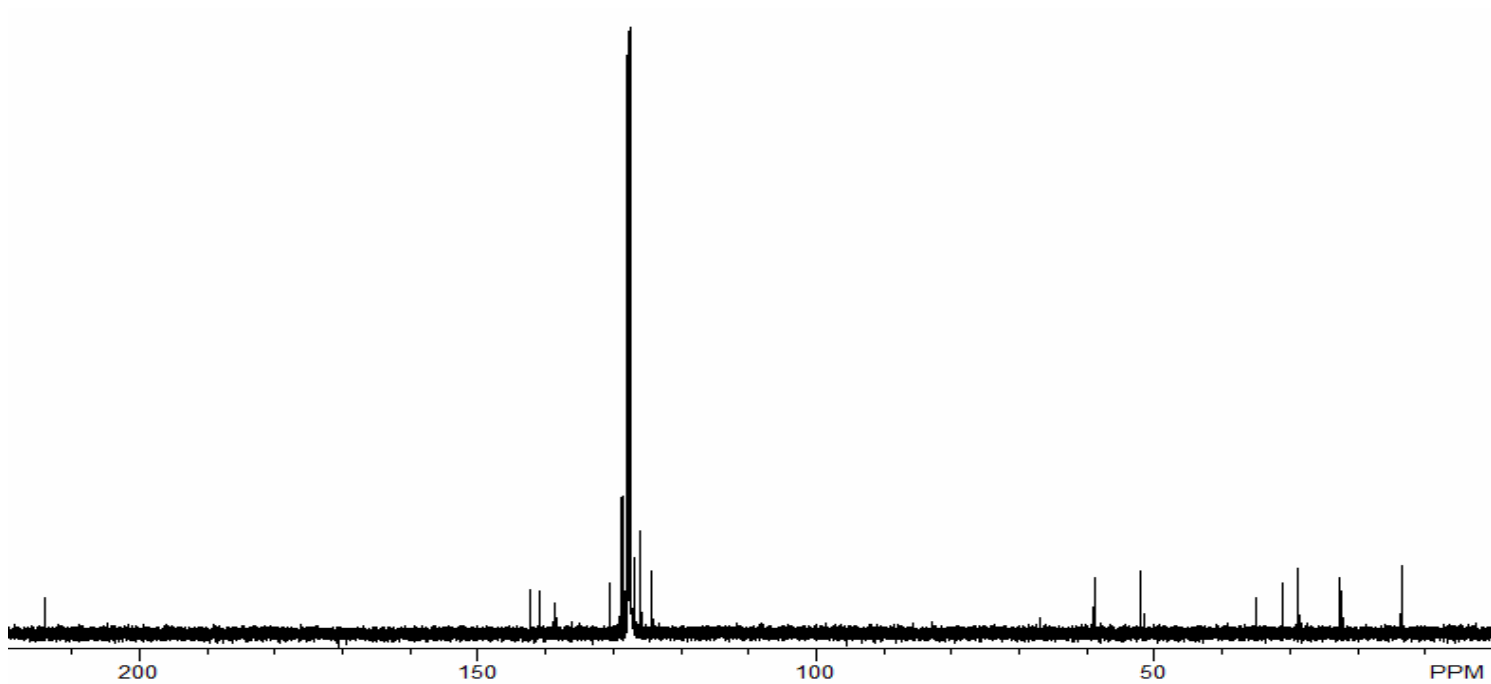

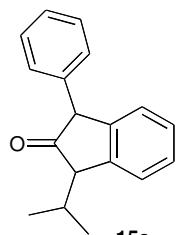

15c  $^1\text{H}$  NMR,  $\text{CDCl}_3$ , 400MHz

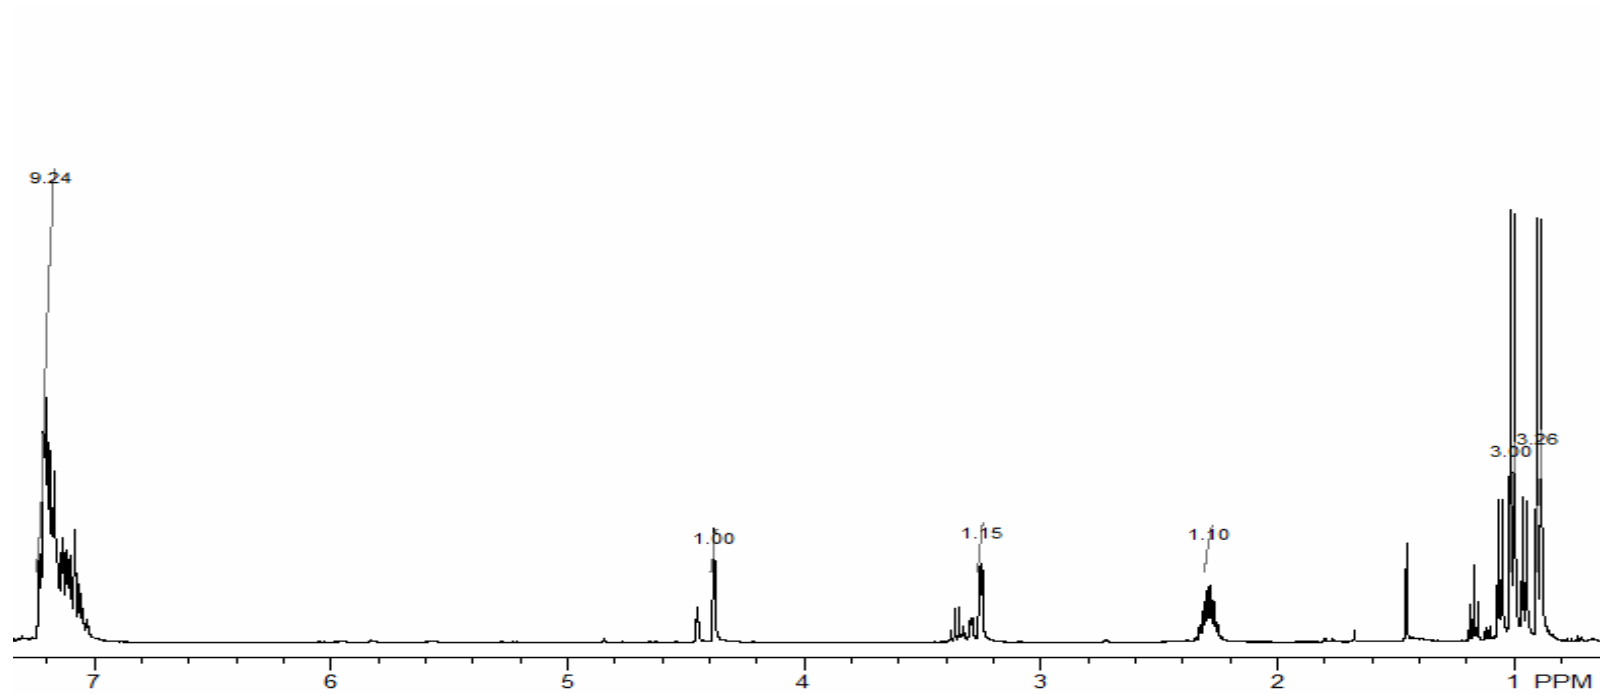



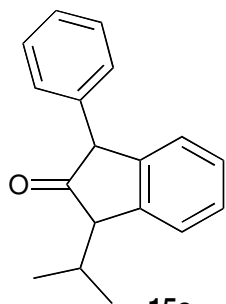

**15c**  $^{13}\text{C}$  NMR,  $\text{CDCl}_3$ , 100MHz

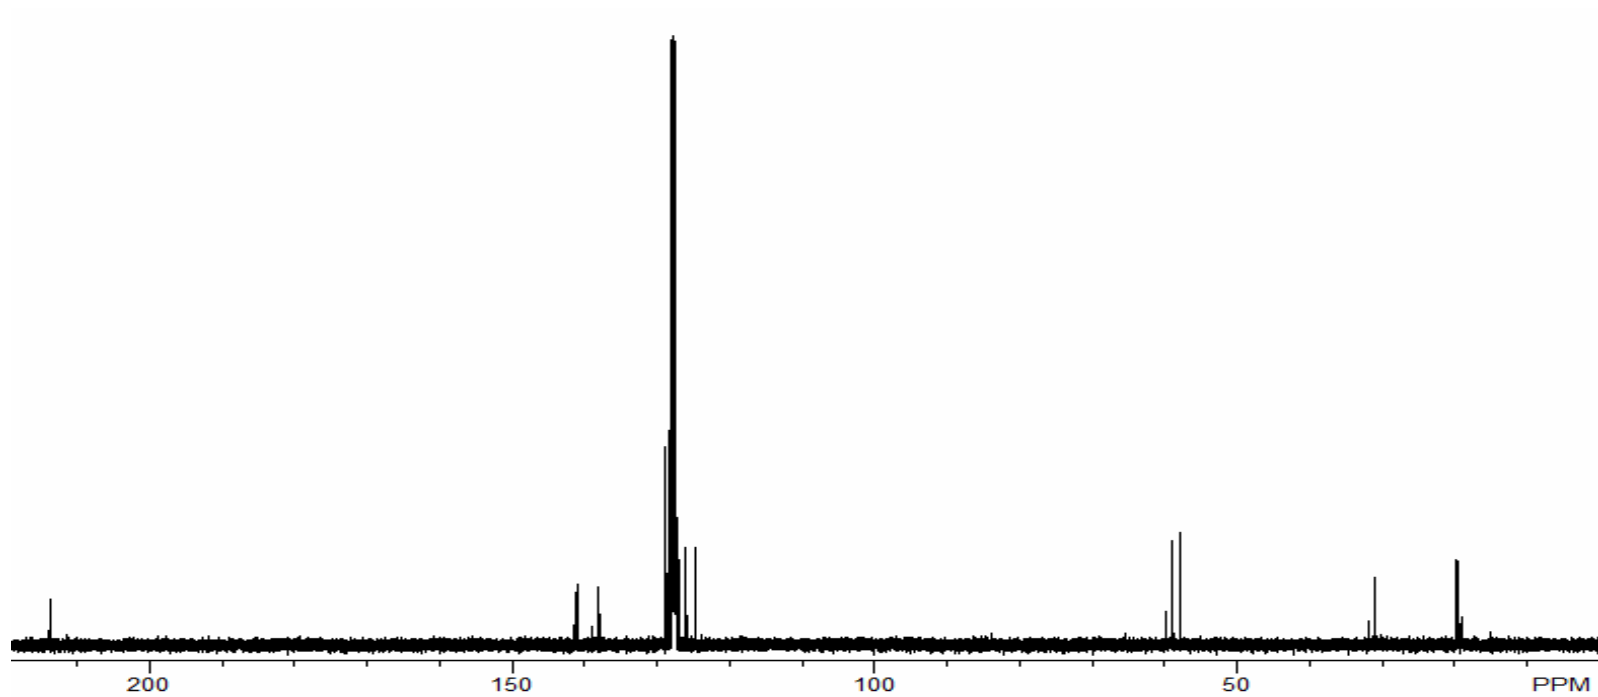

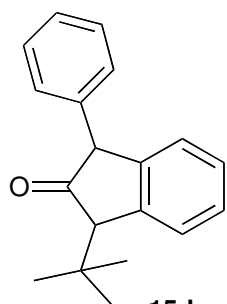

**15d**  $^1\text{H}$  NMR,  $\text{CDCl}_3$ , 400MHz

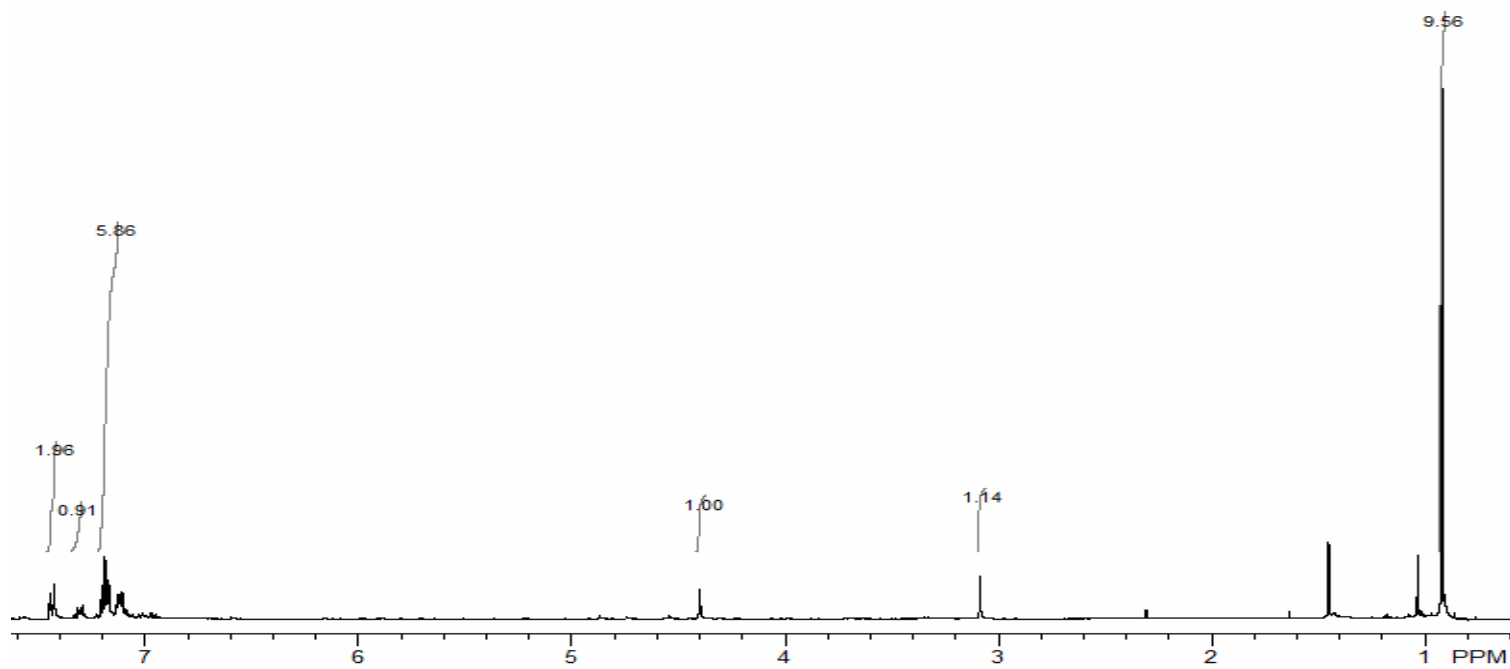

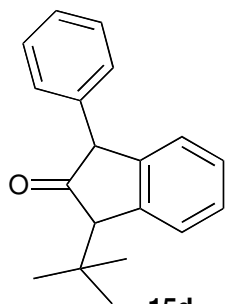

**15d**  $^{13}\text{C}$  NMR,  $\text{CDCl}_3$ , 100MHz

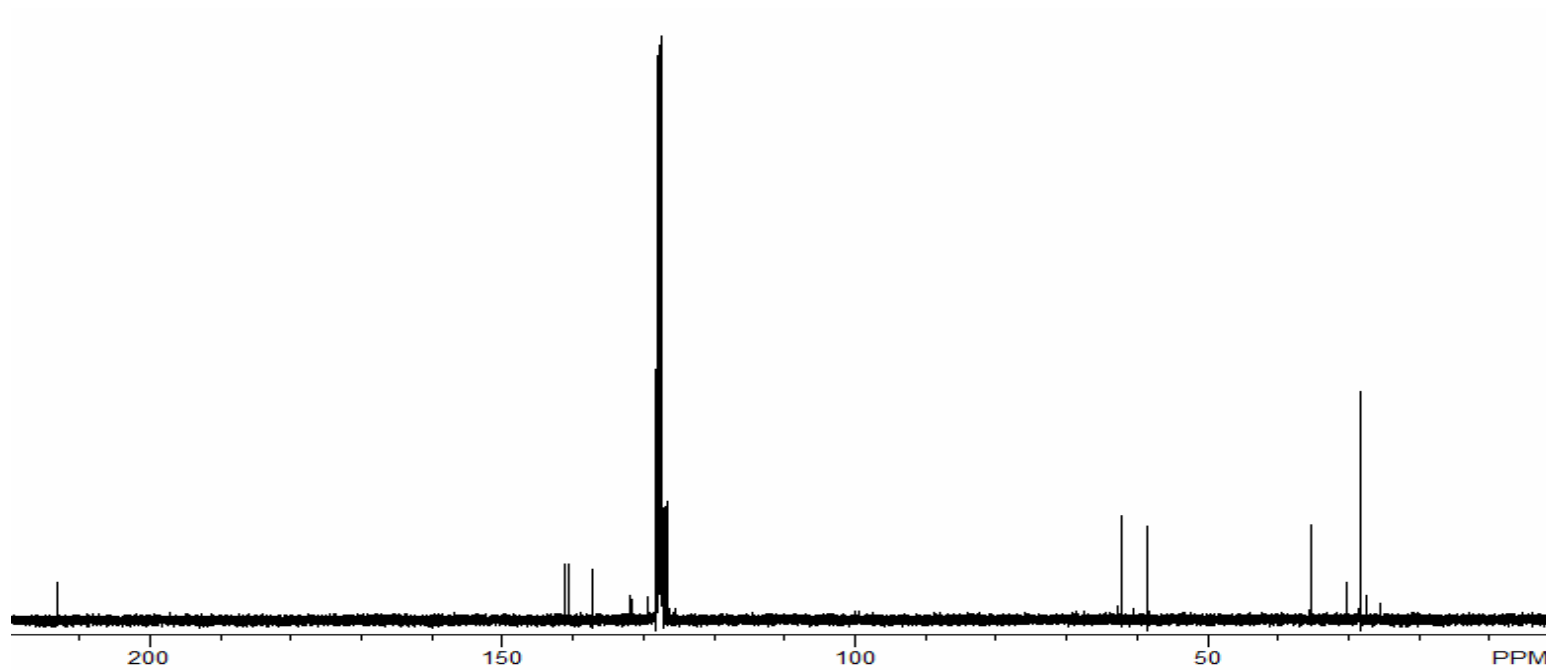

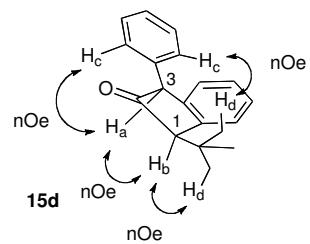

NOESY

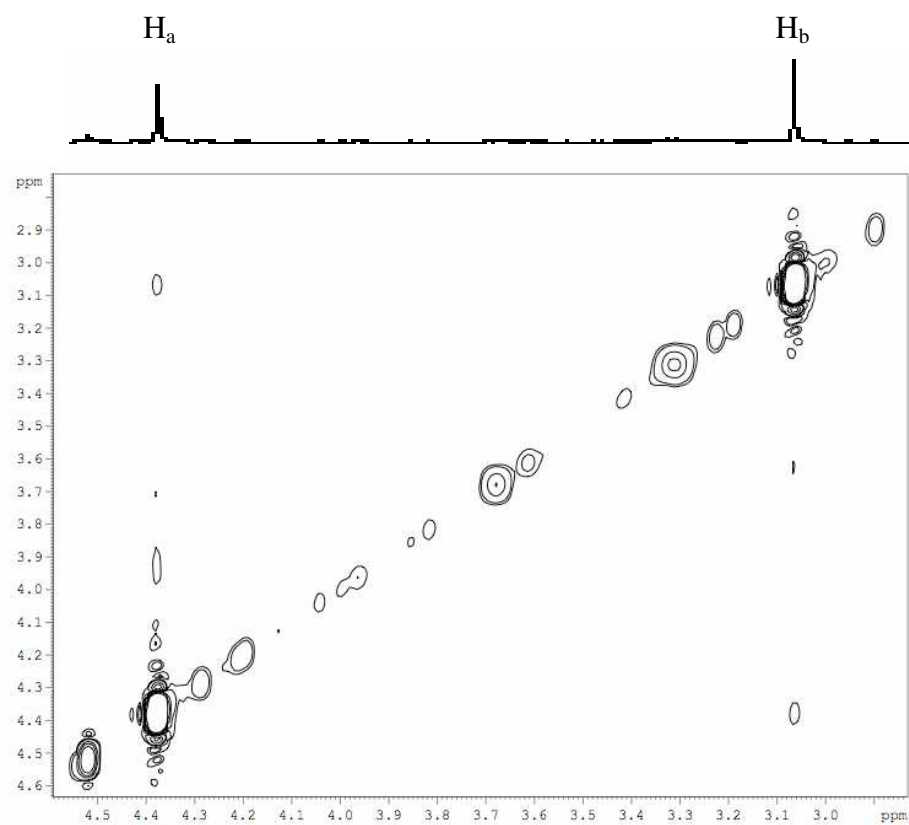

NOESY of **15d** showing the H<sub>a</sub> ↔ H<sub>d</sub> nOe

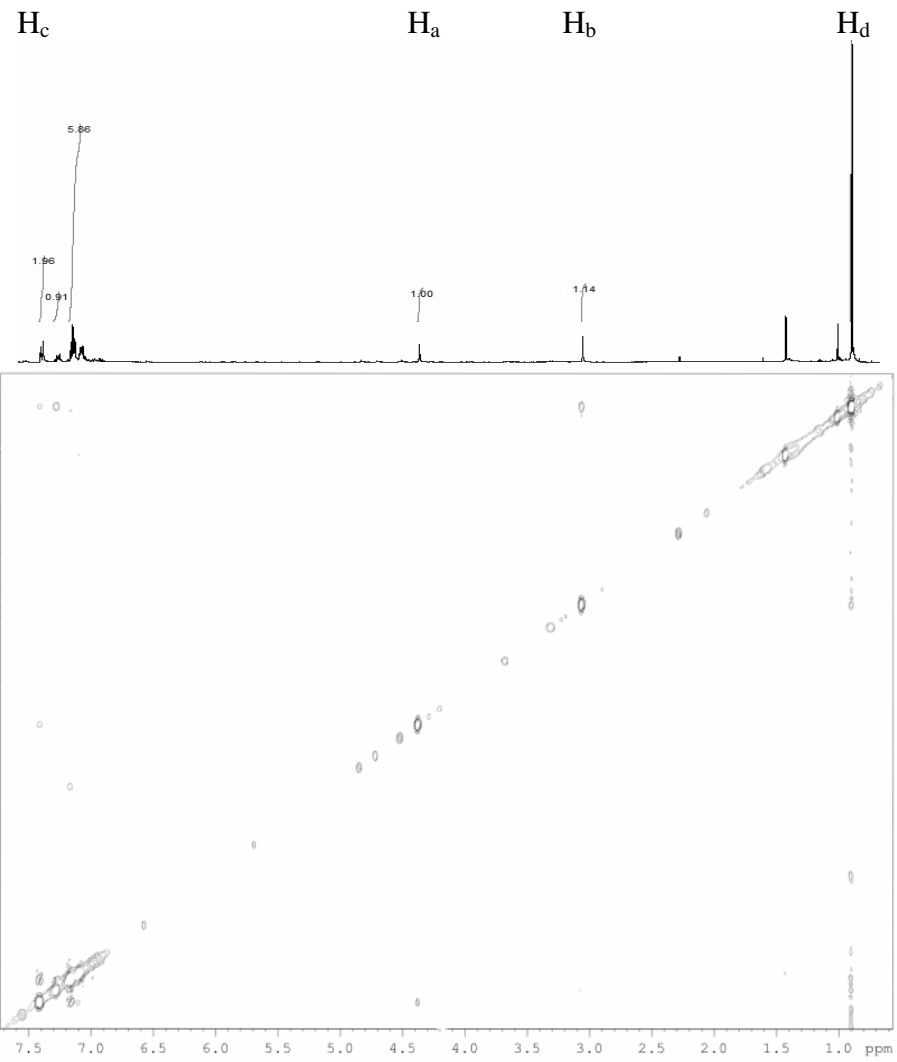

NOESY of **15d** showing the H<sub>c</sub> ↔ H<sub>d</sub>, H<sub>c</sub> ↔ H<sub>a</sub>, and H<sub>b</sub> ↔ H<sub>d</sub> nOes

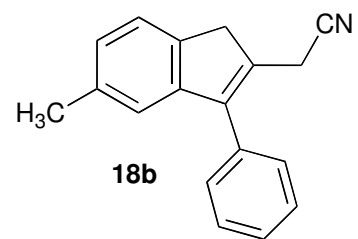

$^1\text{H NMR}$ ,  $\text{CDCl}_3$ , 400MHz

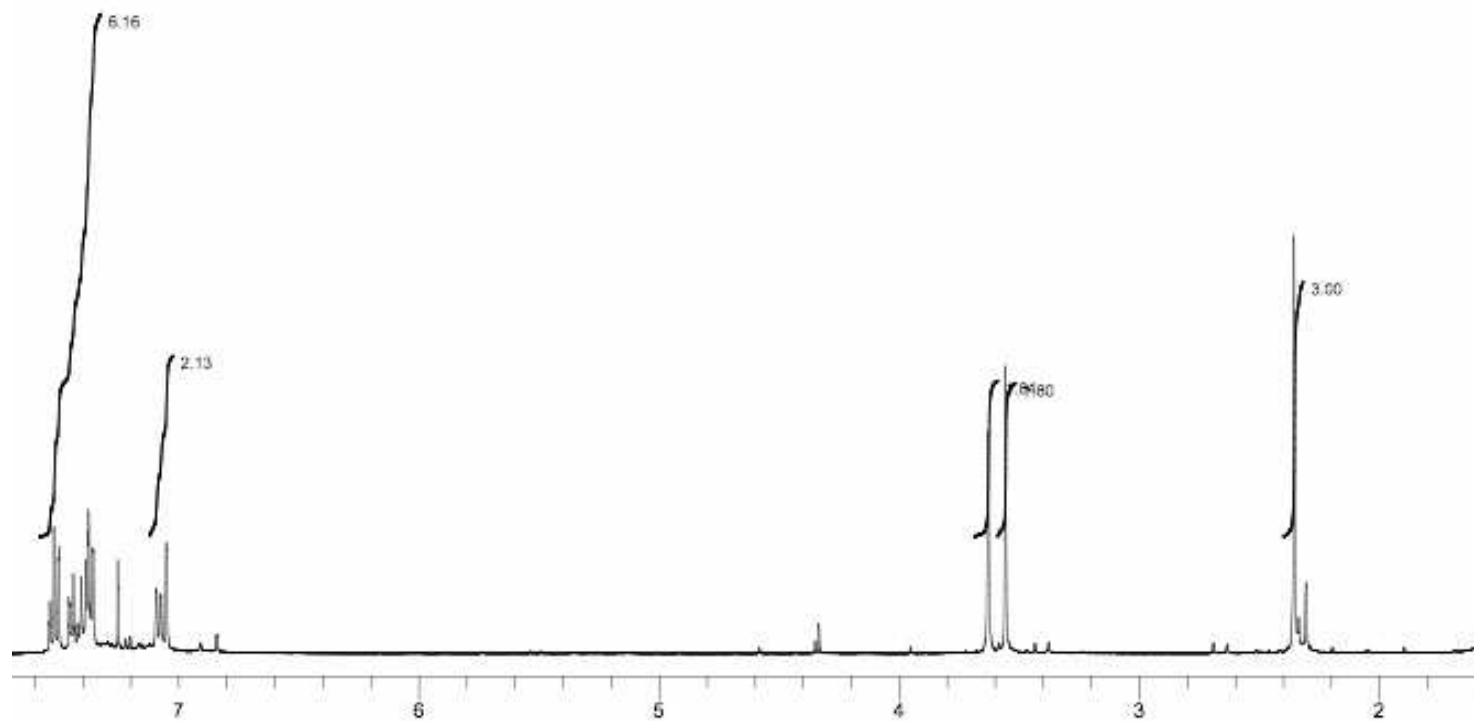

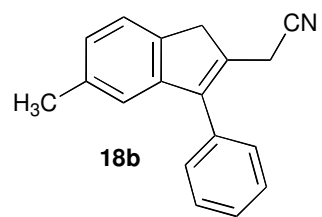

$^{13}\text{C}$  NMR,  $\text{CDCl}_3$ , 100MHz

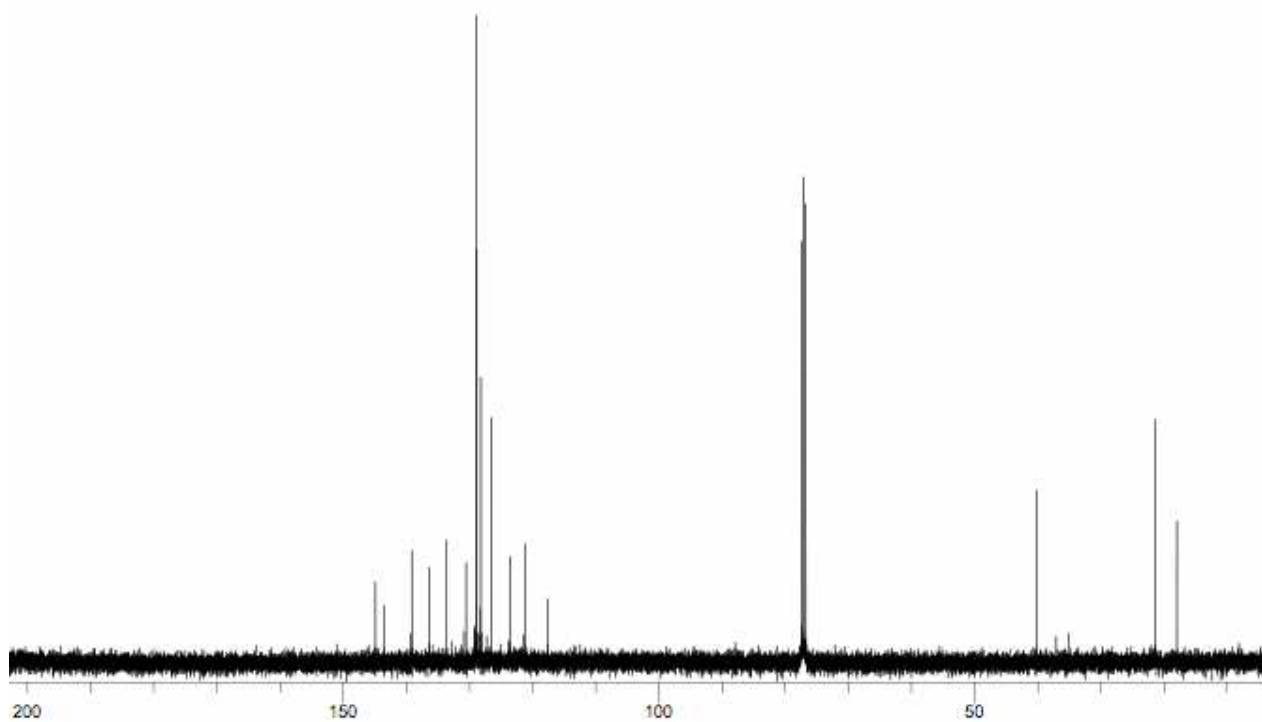

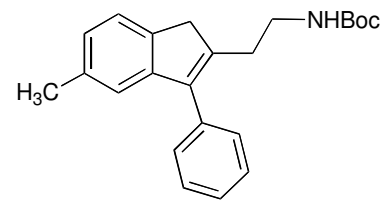

**19b**

$^1\text{H NMR}$ ,  $\text{CDCl}_3$ , 400MHz

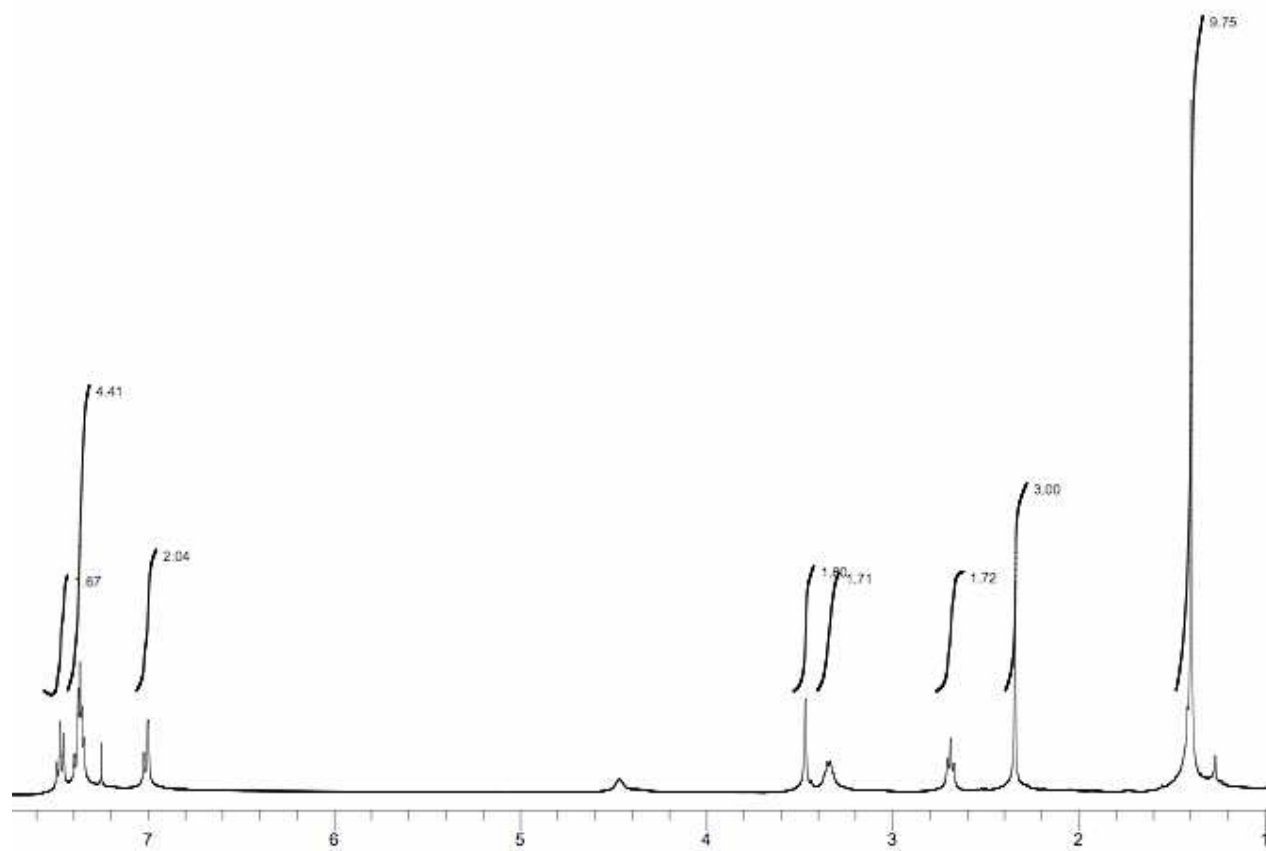



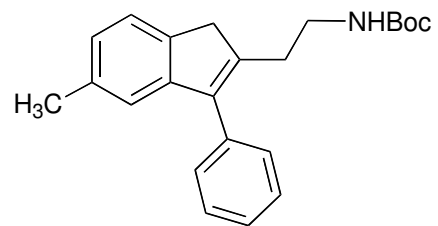

**19b**

$^{13}\text{C}$  NMR,  $\text{CDCl}_3$ , 100MHz

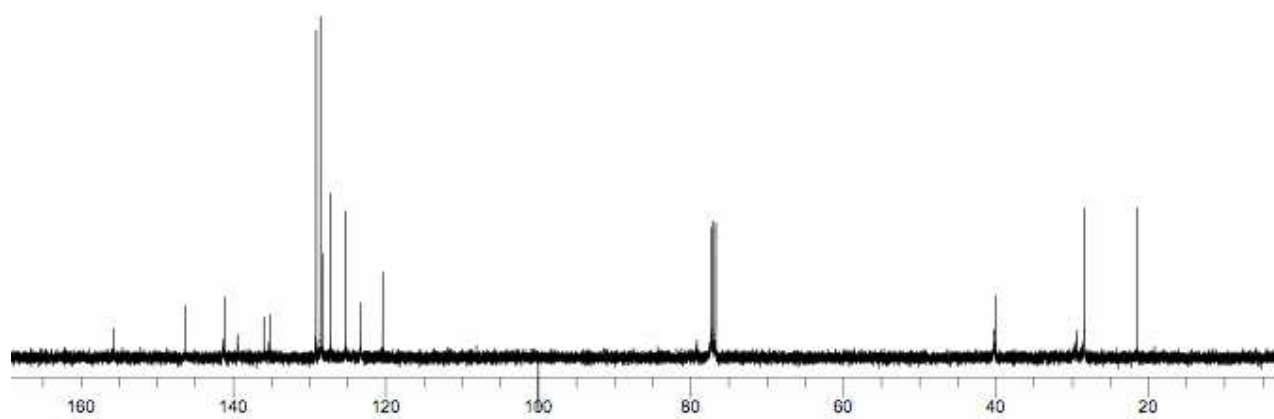

### NMR studies:

A 0.5 M solution of alkynyl ether **12** in  $\text{CDCl}_3$  (0.5 mL) was heated to 330K in the NMR spectrometer and spectra were recorded at 2.5 minute intervals (for  $t=0$  to  $t=15$  minutes), five-minute intervals (for  $t=15$  minutes to  $t=30$  minutes), and 10 minute intervals (for  $t=30$  minutes to  $t=50$  minutes). Integrals of the benzylic protons of **12** and the methylene protons of **13** were measured for each spectrum. The relative concentration or mole fraction of **12** at time  $t$ ,  $[\mathbf{12}]_t$ , was calculated as follows:  $[\mathbf{12}]_t = (\text{area CH}_2 \mathbf{12})_t / [(\text{area CH}_2 \mathbf{12})_t + (\text{area CH}_2 \mathbf{13})_t]$ . The half-life for each reaction was calculated assuming a first-order process for the rearrangement/cyclization reaction, such that  $\ln[\mathbf{12}]_t = -kt + \ln[\mathbf{12}]_0$ .

A plot of  $\ln[\mathbf{12}]_t$  vs.  $t$  gives a straight line with slope  $= -k$ .

and  $\ln 2/k = t_{1/2}$

T=330K, 12a → 13a (t<sub>1/2</sub>=4.8 minutes)

| time | volA    | volB    | total   | [A]=A/A+B  | ln[A]       |
|------|---------|---------|---------|------------|-------------|
| 0    | 6488282 | 1877309 | 8365591 | 0.77559159 | -0.2541292  |
| 2.5  | 1031034 | 1048506 | 2079540 | 0.49579907 | -0.70158453 |
| 5    | 745881  | 1343987 | 2089868 | 0.3569034  | -1.03029012 |
| 7.5  | 529353  | 1542175 | 2071528 | 0.25553746 | -1.36438627 |
| 10   | 379702  | 1703001 | 2082703 | 0.18231212 | -1.70203511 |
| 15   | 182635  | 1872592 | 2055227 | 0.08886366 | -2.42065196 |
| 20   | 82259   | 1996905 | 2079164 | 0.0395635  | -3.22984836 |
| 25   | 21837   | 2048916 | 2070753 | 0.01054544 | -4.55206181 |

$\ln A = -kt + \ln A_0$   
 $k = 0.14528$   
 $t(1/2) = 4.7711122$   
 $t(1/2) = \ln 2 / k$

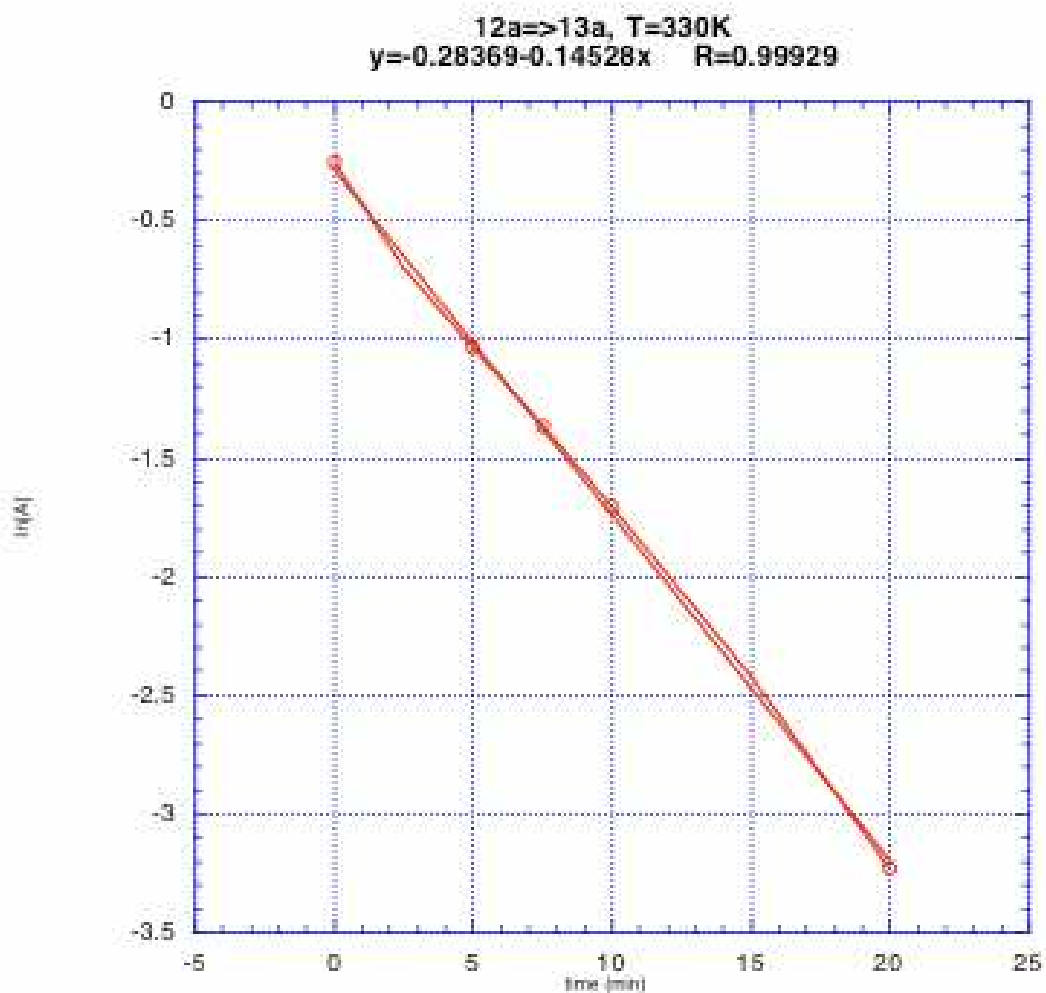

T=330K, 12a → 13a ( $t_{1/2}$ =4.8 minutes)

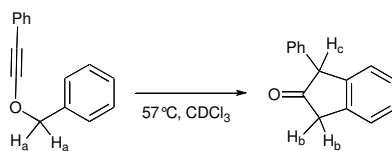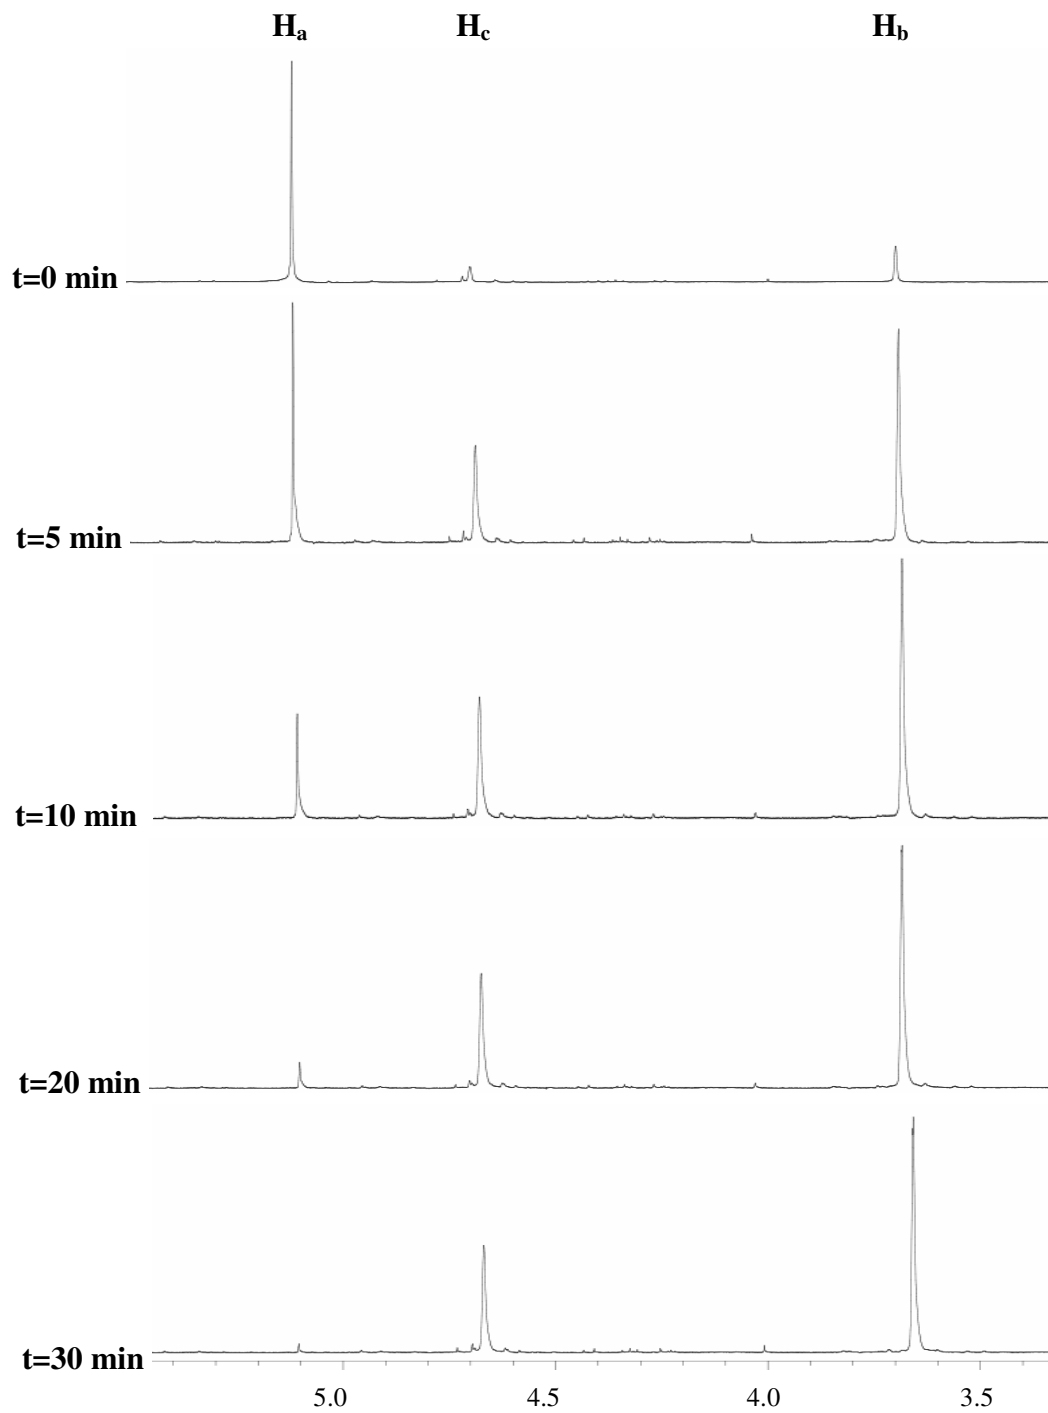

T=330K, 12b → 13d ( $t_{1/2}=0.8$  minutes)

| time(min) | volA    | volB    | total   | [A]=A/A+B  | ln[A]       |
|-----------|---------|---------|---------|------------|-------------|
| 0         | 6188628 | 2873985 | 9062613 | 0.68287457 | -0.38144407 |
| 2.5       | 128772  | 1686230 | 1815002 | 0.07094868 | -2.64579845 |
| 5         | 14393   | 1933669 | 1948062 | 0.00738837 | -4.90784833 |

$\ln A = -kt + \ln A_0$   
 $k = 0.905$   
 $t(1/2) = 0.76590849$   
 $t(1/2) = \ln 2 / k$

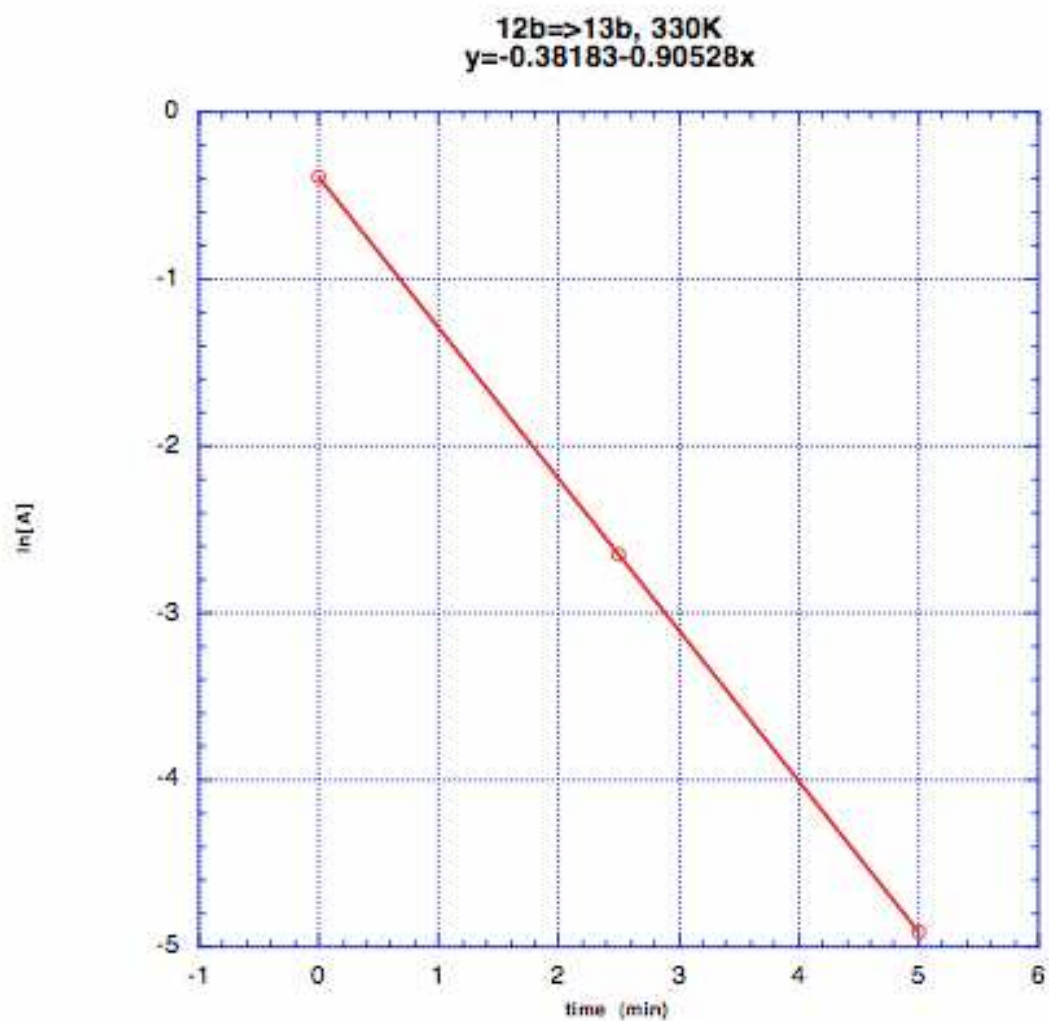

T=330K, 12b → 13d ( $t_{1/2}$ =0.8 minutes)

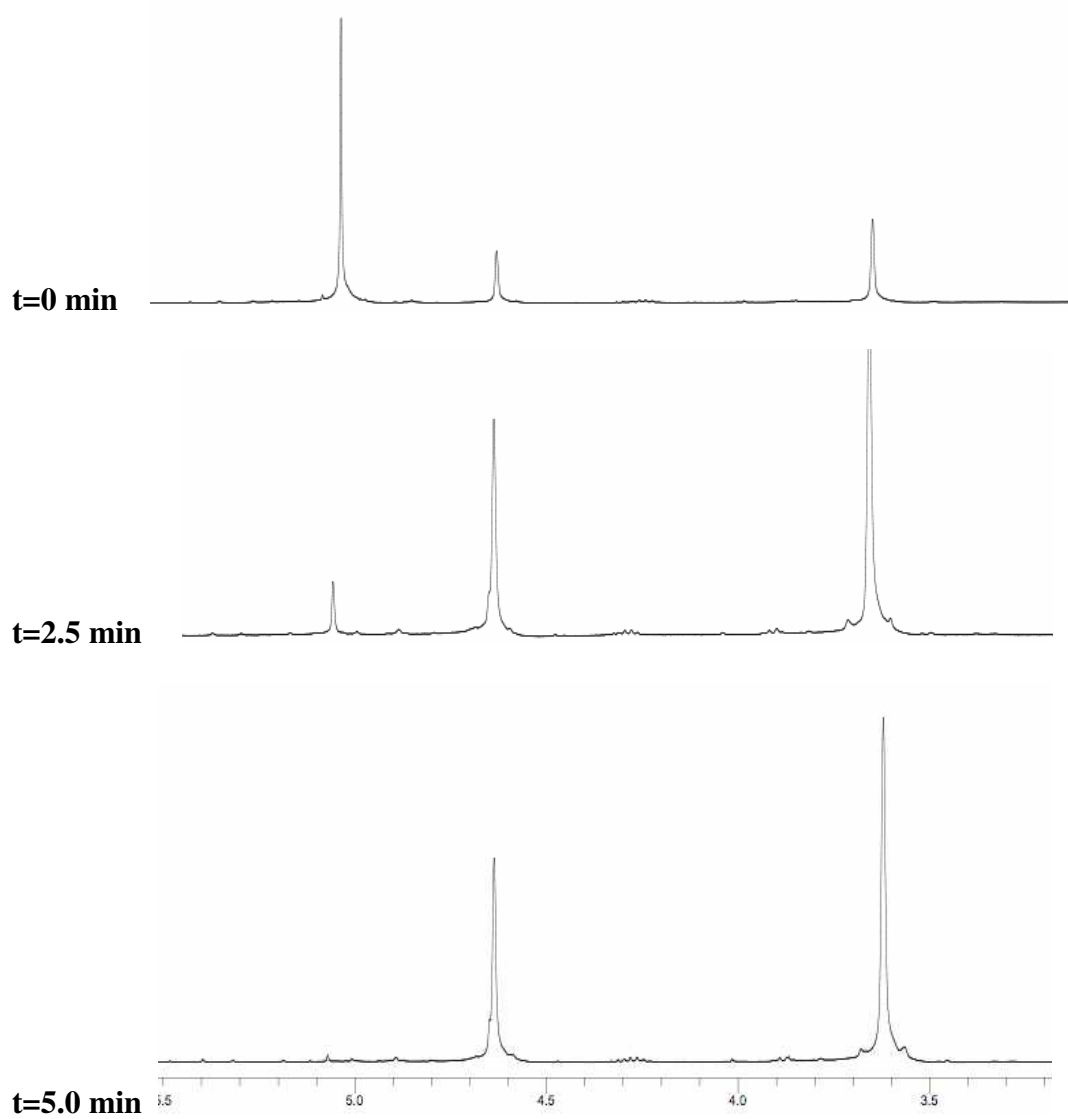

T=330K, 12d→13d ( $t_{1/2}$ =13.3 minutes)

| time(min) | volA    | volB    | total   | [A]=A/A+B  | ln[A]       |
|-----------|---------|---------|---------|------------|-------------|
| 0         | 1072441 | 73617   | 1146058 | 0.93576503 | -0.06639087 |
| 5         | 856174  | 504351  | 1360525 | 0.62929678 | -0.46315231 |
| 10        | 677909  | 709662  | 1387571 | 0.48855806 | -0.71629695 |
| 15        | 523913  | 839648  | 1363561 | 0.3842241  | -0.9565293  |
| 20        | 396210  | 950123  | 1346333 | 0.29428826 | -1.22319551 |
| 25        | 310440  | 1069794 | 1380234 | 0.22491838 | -1.49201768 |
| 30        | 234283  | 1106836 | 1341119 | 0.17469218 | -1.74472983 |
| 40        | 147493  | 1211924 | 1359417 | 0.10849725 | -2.22103049 |
| 50        | 84855   | 1364179 | 1449034 | 0.0585597  | -2.83770849 |

$\ln A = -kt + \ln A_0$   
 $k = 0.052148$   
 $t(1/2) = 13.2919226$   
 $t(1/2) = \ln 2 / k$

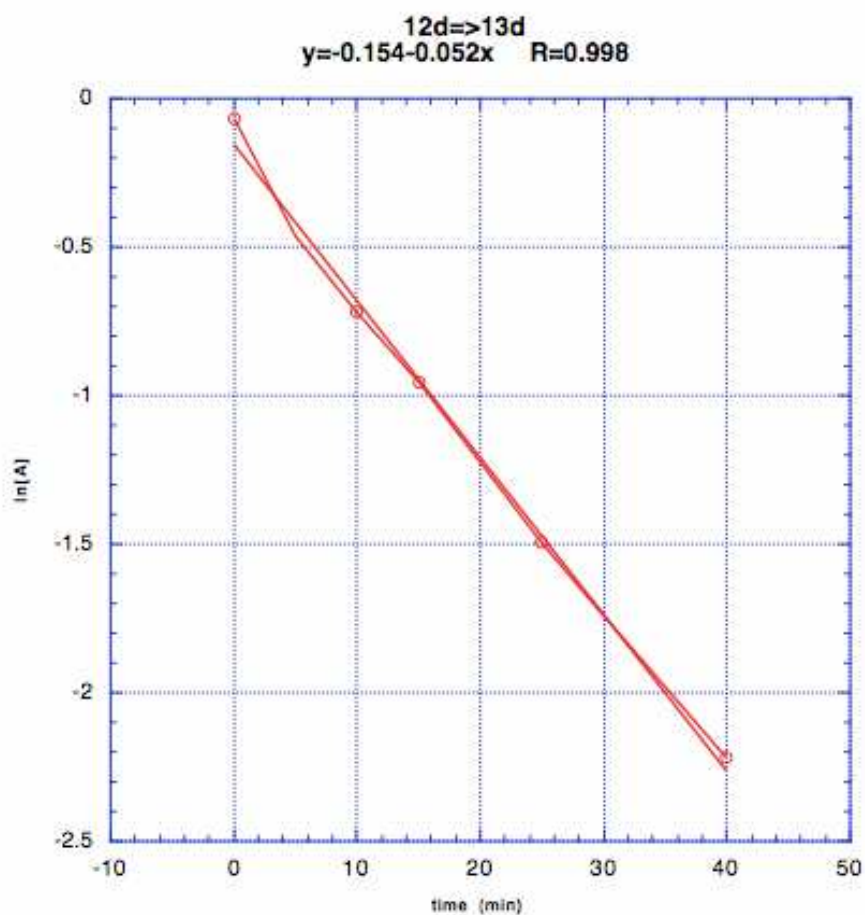

T=330K, 12d → 13d ( $t_{1/2}$ =13.3 minutes)

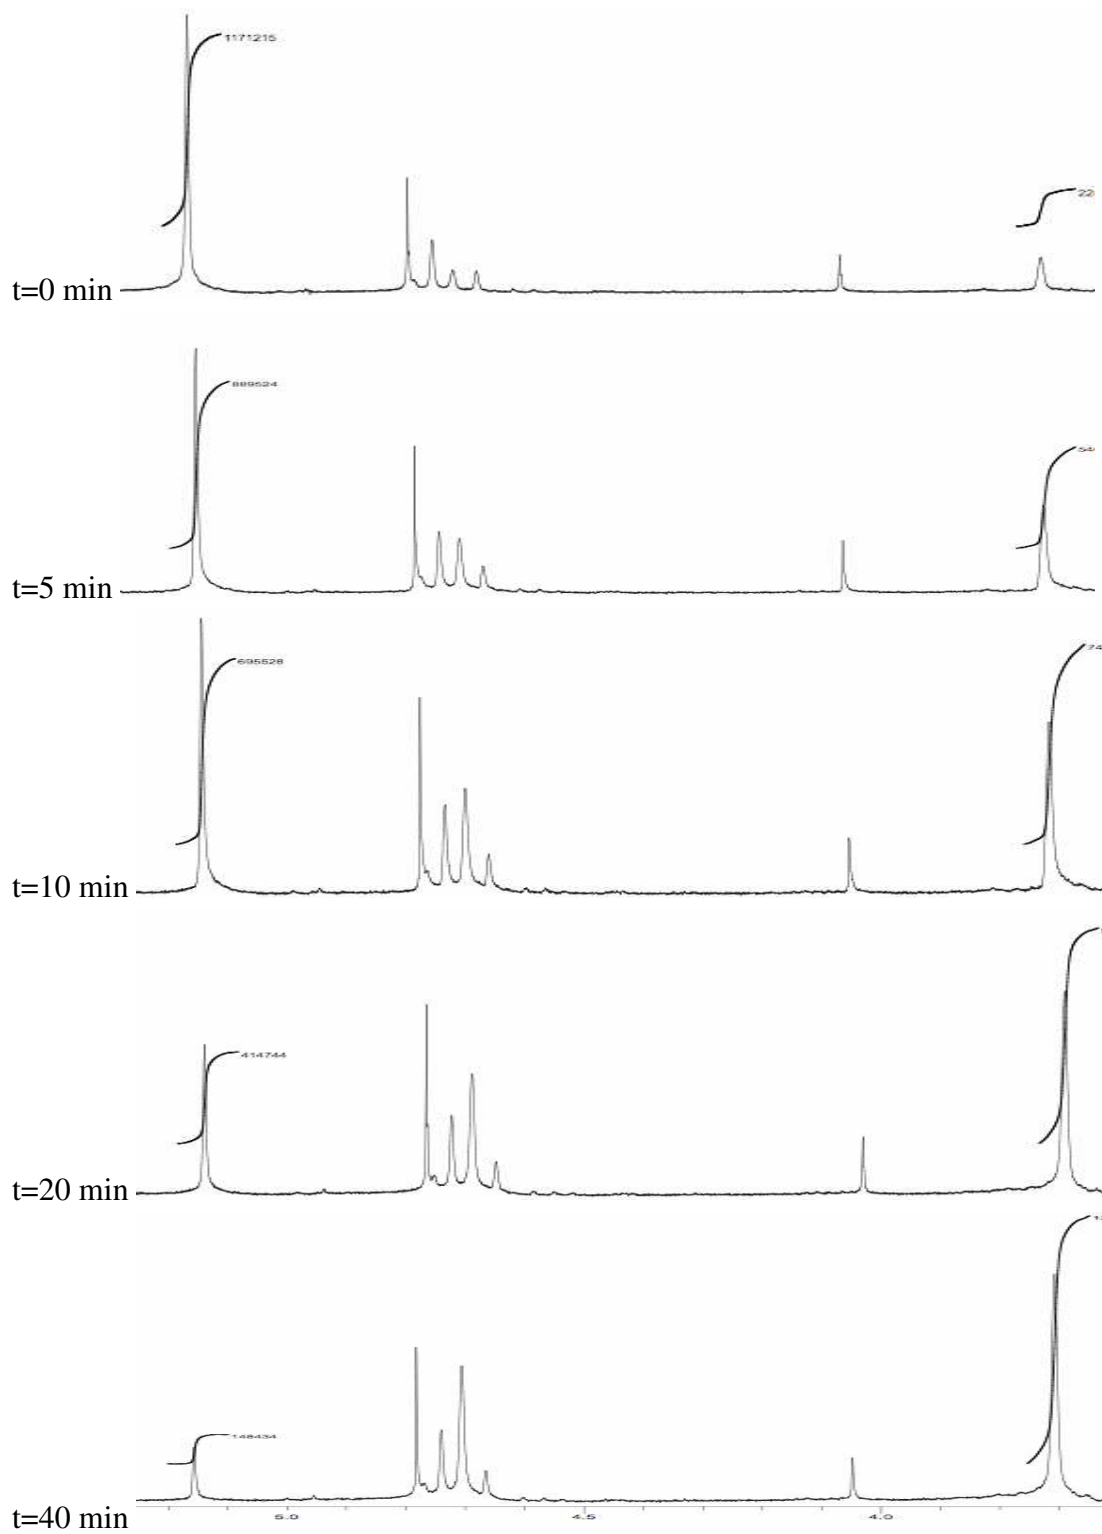



T=330K, 12f → 13f (t<sub>1/2</sub>=3.6 minutes)

| time(min) | volA    | volB    | total    | [A]=A/A+B  | ln[A]       |
|-----------|---------|---------|----------|------------|-------------|
| 0         | 9950172 | 1278905 | 11229077 | 0.88610774 | -0.12091674 |
| 2.5       | 5139848 | 3837368 | 8977216  | 0.57254365 | -0.5576663  |
| 5         | 849015  | 1419294 | 2268309  | 0.37429424 | -0.98271304 |
| 7.5       | 537846  | 1746491 | 2284337  | 0.2354495  | -1.44625883 |
| 10        | 331317  | 1923428 | 2254745  | 0.14694212 | -1.91771654 |
| 12.5      | 202694  | 2096178 | 2298872  | 0.08817107 | -2.42847639 |
| 15        | 110209  | 2163813 | 2274022  | 0.04846435 | -3.02692679 |
| 20        | 13403   | 2274629 | 2288032  | 0.00585787 | -5.13996878 |

lnA=-kt +lnA<sub>0</sub>  
k=0.19135  
t(1/2)= 3.62240492  
t(1/2)=ln2/k

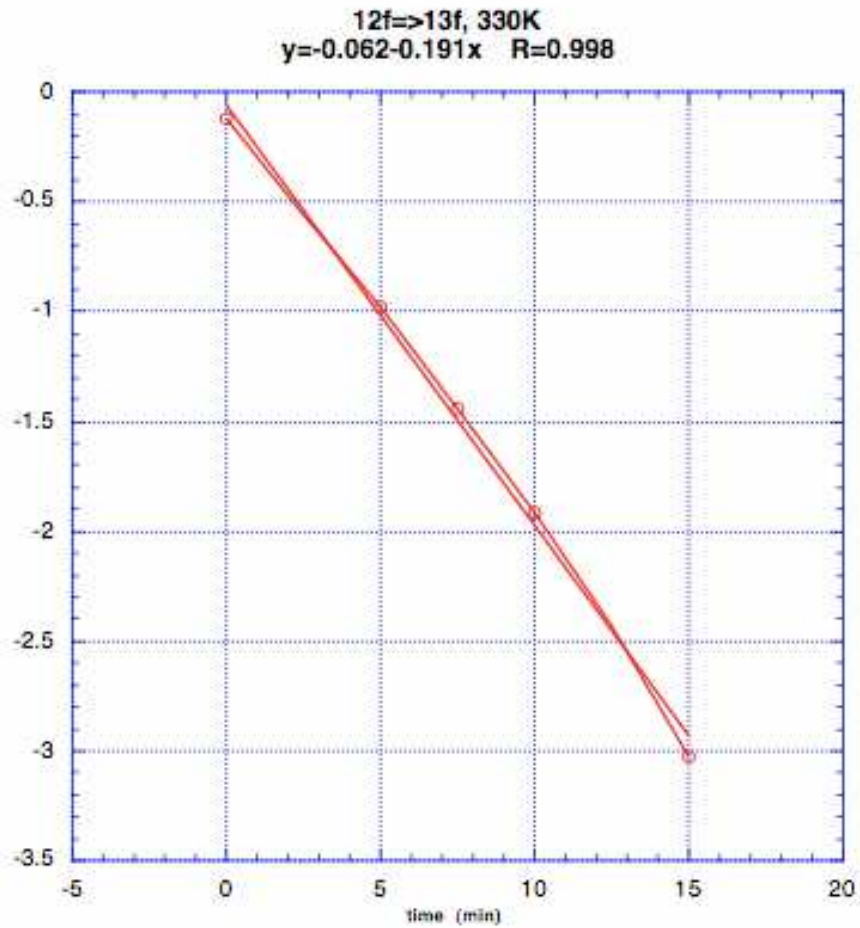

T=330K, 12f → 13f ( $t_{1/2}$ =3.6 minutes)

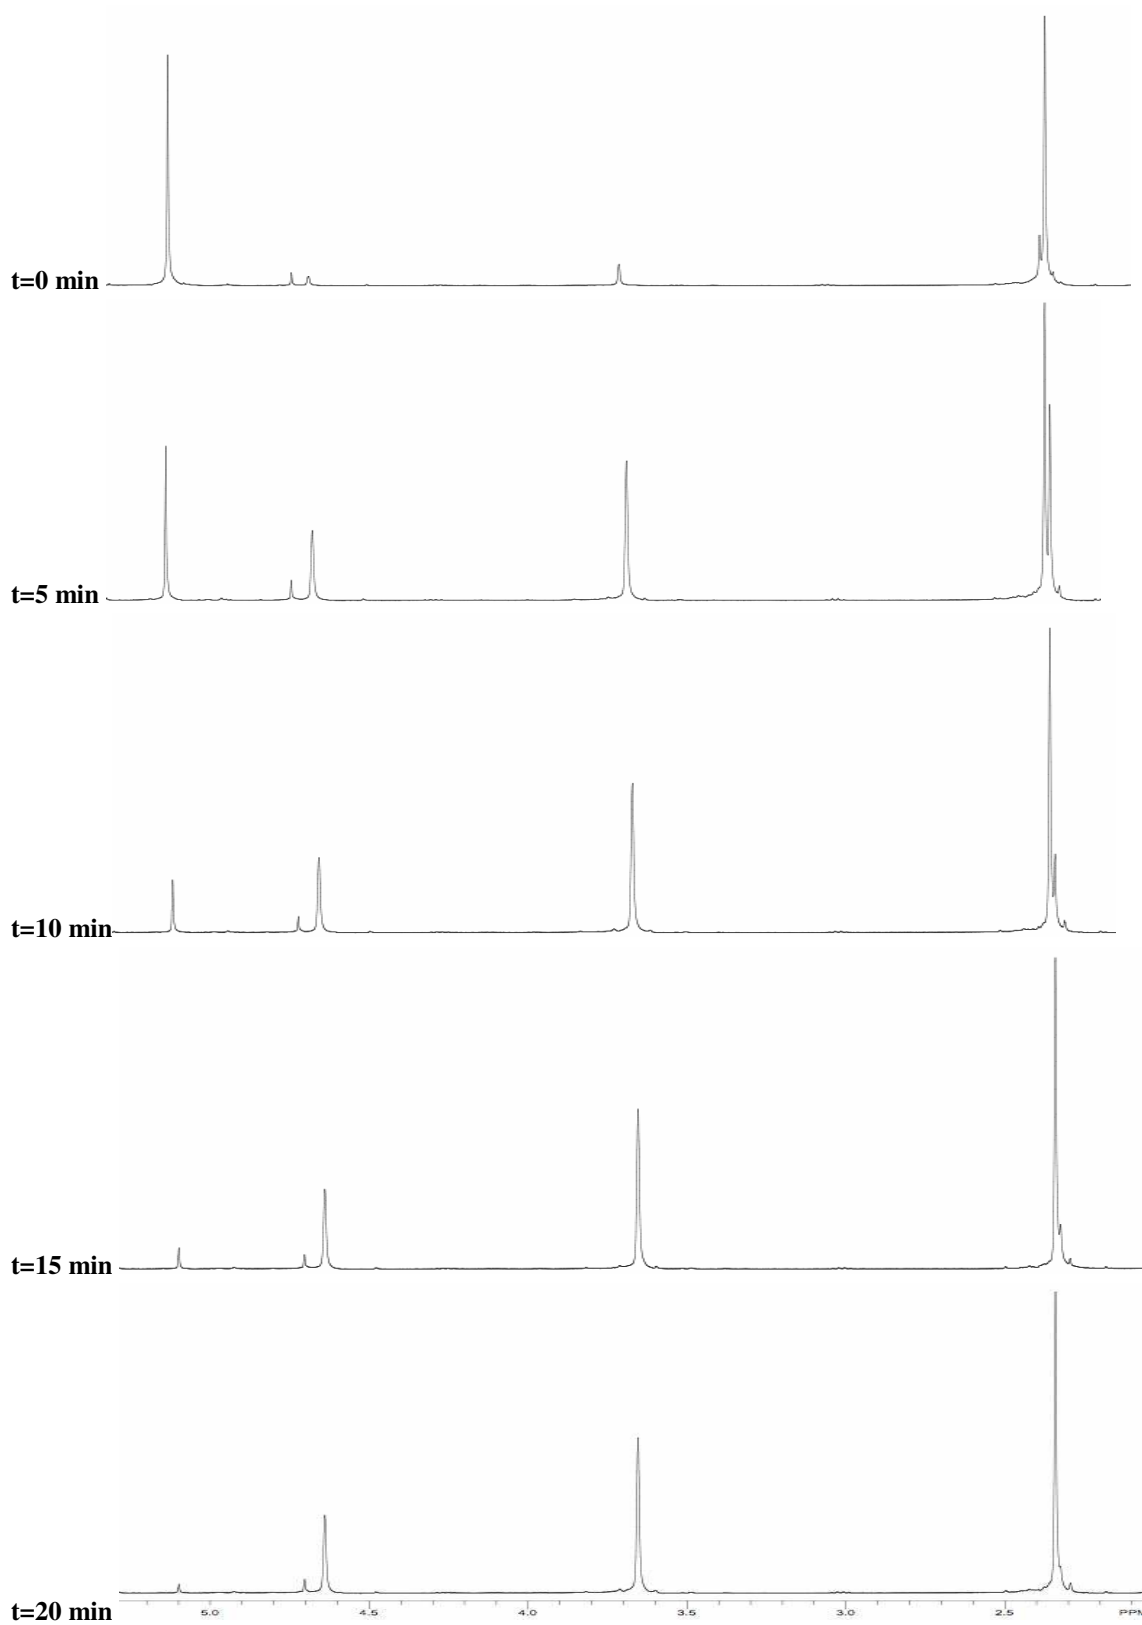

T=330K, 12h → 13h ( $t_{1/2}$ =4.6 minutes)

| time(min) | volA    | volB    | total   | [A]=A/A+B  | ln[A]       |
|-----------|---------|---------|---------|------------|-------------|
| 0         | 7848837 | 582730  | 8431567 | 0.93088711 | -0.07161727 |
| 2.5       | 1217211 | 657172  | 1874383 | 0.64939289 | -0.43171736 |
| 5         | 806067  | 1018579 | 1824646 | 0.44176624 | -0.81697441 |
| 7.5       | 568804  | 1280658 | 1849462 | 0.30755106 | -1.17911415 |
| 10        | 390032  | 1447634 | 1837666 | 0.21224314 | -1.55002278 |
| 12.5      | 269542  | 1589593 | 1859135 | 0.14498248 | -1.93114238 |
| 15        | 188396  | 1683138 | 1871534 | 0.10066395 | -2.29596756 |
| 20        | 89604   | 1744882 | 1834486 | 0.0488442  | -3.01911965 |
| 25        | 40389   | 1843809 | 1884198 | 0.02143565 | -3.84270007 |

$\ln A = -kt + \ln A_0$   
 $k = 0.14984$   
 $t(1/2) = 4.62591551$   
 $t(1/2) = \ln 2 / k$

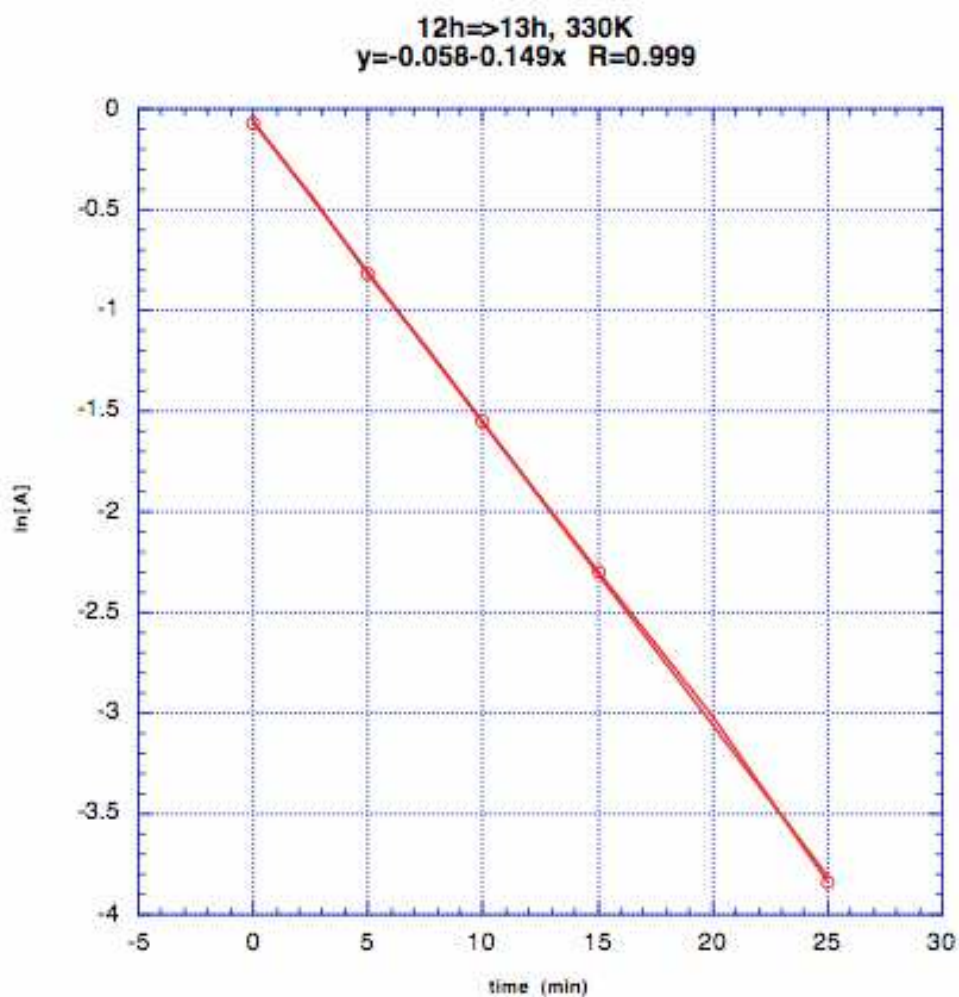

T=330K, 12h → 13h ( $t_{1/2}$ =4.6 minutes)

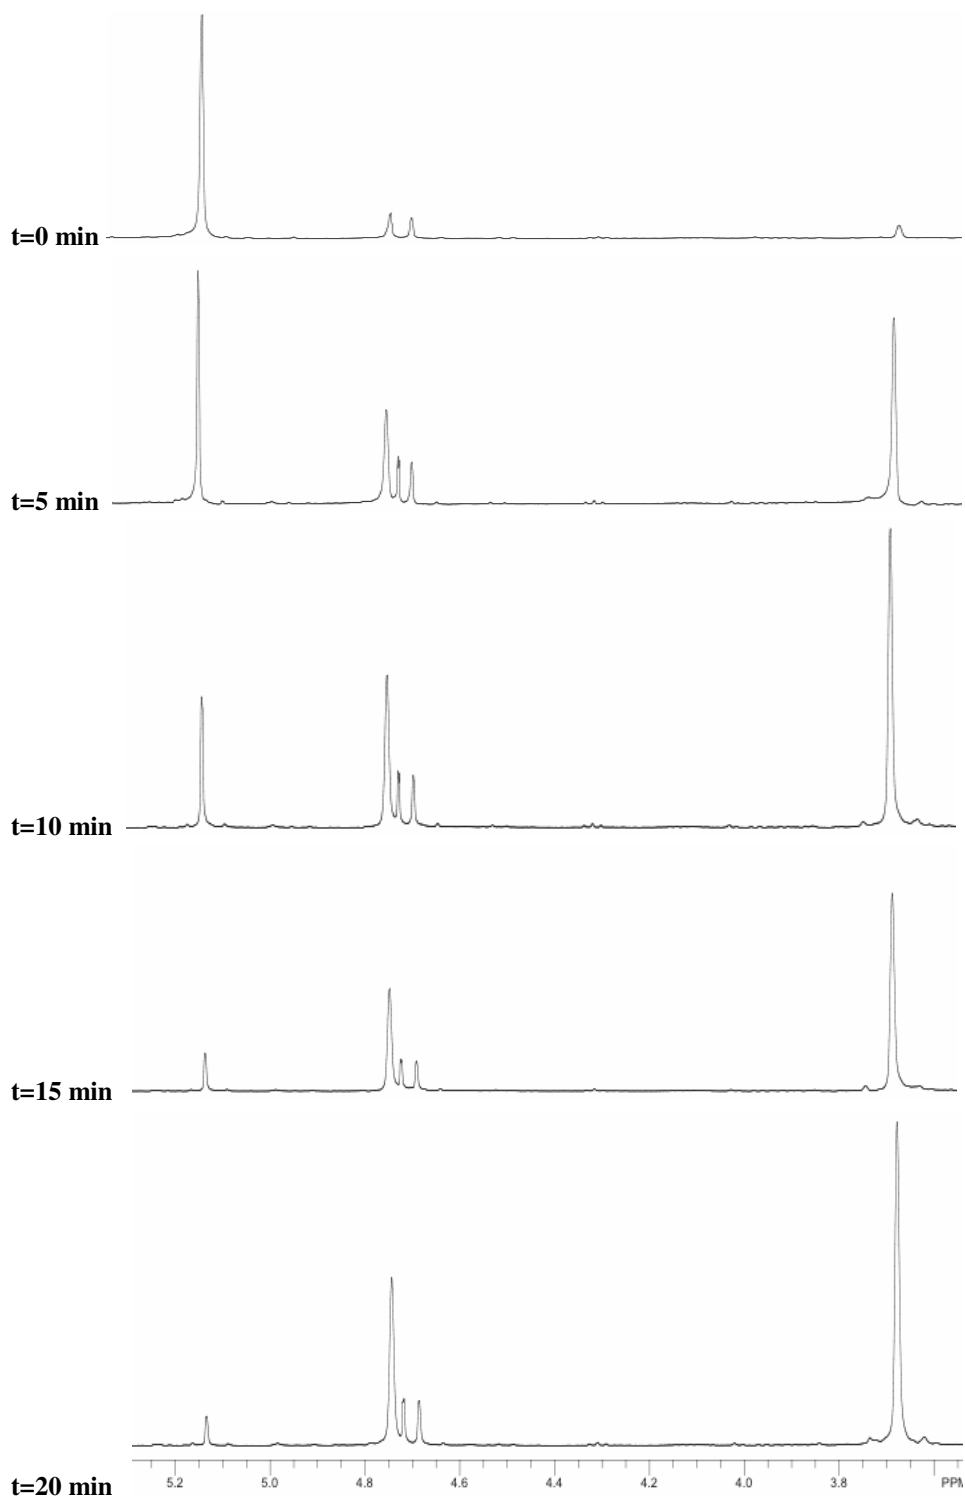

Data for Hammett plot, 12a, 12b, 12d

| Y               | $\ln(k/k_0)$ | $\sigma$ |
|-----------------|--------------|----------|
| CF <sub>3</sub> | -0.9877      | 0.53     |
| H               | 0            | 0        |
| CH <sub>3</sub> | 1.7871       | -0.17    |

( $\sigma$  values obtained from reference 13, main text)

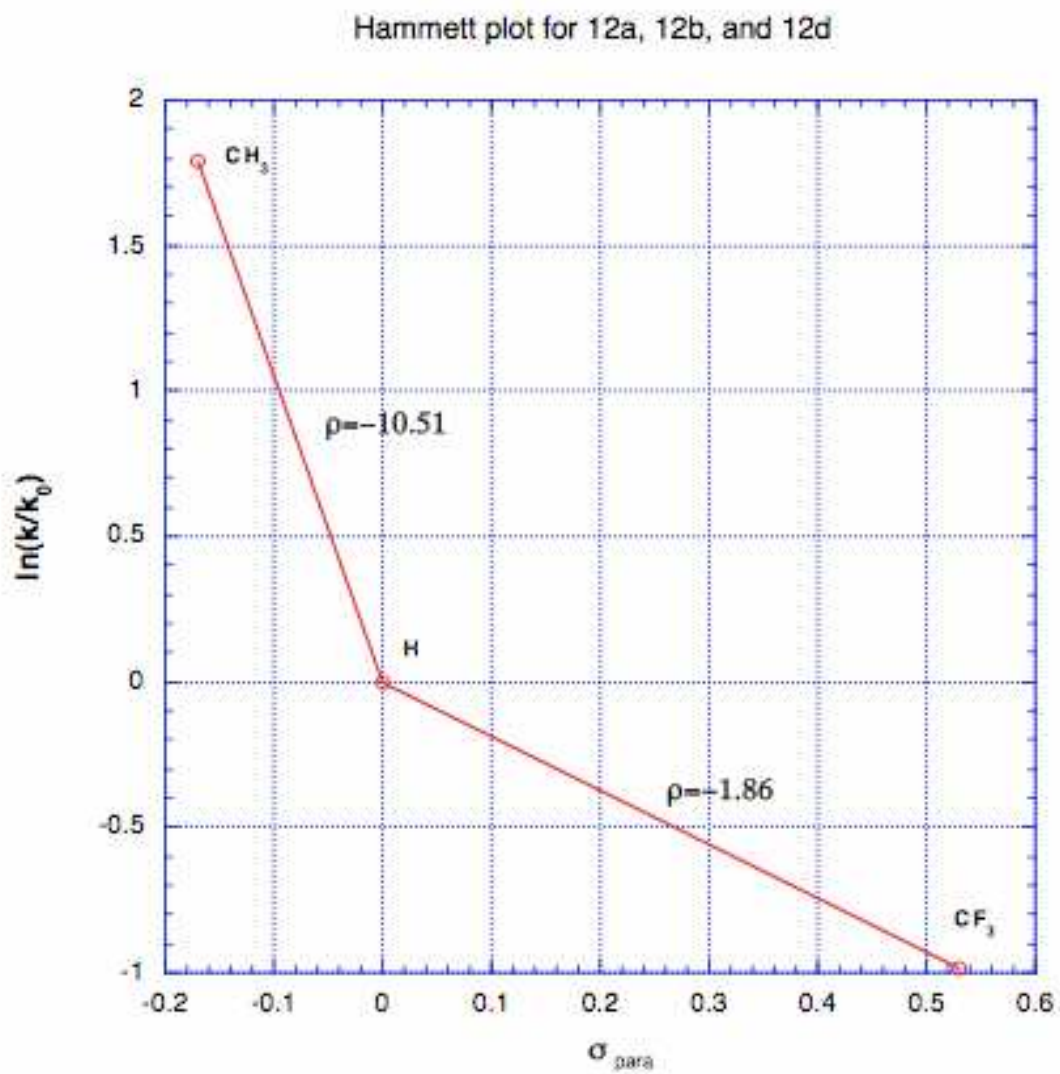

Data for Hammett plot, 12a, 12f, 12h

| X                  | $\ln(k/k_0)$ | $\sigma$ |
|--------------------|--------------|----------|
| Ph-CF <sub>3</sub> | 0.0272       | 0.53     |
| Ph-H               | 0            | 0        |
| Ph-CH <sub>3</sub> | 0.2755       | -0.17    |

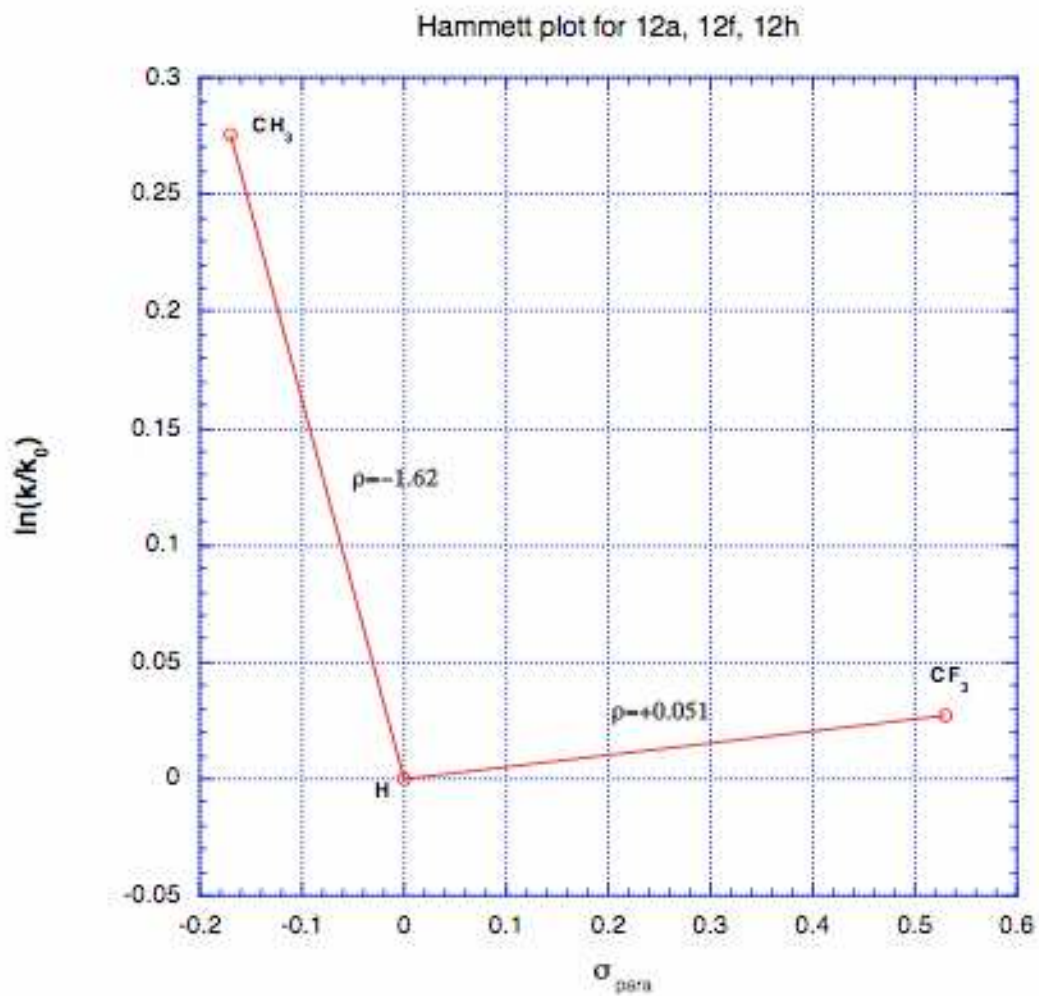

Supplement: NIHMS282391-supplement-1_si_001.pdf [file NIHMS282391-supplement-1_si_001.pdf]
